# Supplementary material for: Convergent evolution of a labile nutritional symbiosis in ants
Source: ISME J. 2022 Jun 14;16(9):2114–22. doi: 10.1038/s41396-022-01256-1 (PMC9381600; doi:10.1038/s41396-022-01256-1)
Supplement: Supplementary file 2 — Supplementary Tables [file 41396_2022_1256_MOESM2_ESM.xlsx]

## Sheet: S1 - DAVID
Functional Annotation Clustering using David
Annotation Cluster 1	Enrichment Score: 45.9099337549194
Category	Term	Count	%	PValue	Genes	List Total	Pop Hits	Pop Total	Fold Enrichment	Bonferroni	Benjamini	FDR
UP_KEYWORDS	Ribosomal protein	52	18.4397	8.17362e-56	RPSU, RPLD, RPLE, RPLB, RPLC, RPLL, RPLM, RPLJ, RPLK, RPLI, RPLF, RPSC, RPSD, RPSA, RPSB, RPSK, RPSL, RPSI, RPSJ, RPSG, RPSH, RPSE, RPSF, RPSS, RPST, RPSQ, RPSR, RPSO, RPSP, RPSM, RPSN, RPLT, RPLU, RPLR, RPLS, RPLP, RPLQ, RPLN, RPLO, RPLX, RPLY, RPLV, RPLW, RPME, RPMF, RPMC, RPMA, RPMB, RPMI, RPMJ, RPMG, RPMH	282	56	4139	13.6289	1.38134e-53	1.38134e-53	1.02988e-53
UP_KEYWORDS	Ribonucleoprotein	52	18.4397	7.32753e-55	RPSU, RPLD, RPLE, RPLB, RPLC, RPLL, RPLM, RPLJ, RPLK, RPLI, RPLF, RPSC, RPSD, RPSA, RPSB, RPSK, RPSL, RPSI, RPSJ, RPSG, RPSH, RPSE, RPSF, RPSS, RPST, RPSQ, RPSR, RPSO, RPSP, RPSM, RPSN, RPLT, RPLU, RPLR, RPLS, RPLP, RPLQ, RPLN, RPLO, RPLX, RPLY, RPLV, RPLW, RPME, RPMF, RPMC, RPMA, RPMB, RPMI, RPMJ, RPMG, RPMH	282	57	4139	13.3898	1.23835e-52	6.19177e-53	4.61635e-53
GOTERM_MF_DIRECT	GO:0003735~structural constituent of ribosome	52	18.4397	1.35536e-49	RPSU, RPLD, RPLE, RPLB, RPLC, RPLL, RPLM, RPLJ, RPLK, RPLI, RPLF, RPSC, RPSD, RPSA, RPSB, RPSK, RPSL, RPSI, RPSJ, RPSG, RPSH, RPSE, RPSF, RPSS, RPST, RPSQ, RPSR, RPSO, RPSP, RPSM, RPSN, RPLT, RPLU, RPLR, RPLS, RPLP, RPLQ, RPLN, RPLO, RPLX, RPLY, RPLV, RPLW, RPME, RPMF, RPMC, RPMA, RPMB, RPMI, RPMJ, RPMG, RPMH	276	57	3186	10.5309	4.21516e-47	4.21516e-47	3.9983e-47
GOTERM_BP_DIRECT	GO:0006412~translation	51	18.0851	3.41328e-43	RPSU, LYSS, RPLD, RPLE, RPLC, RPLL, RPLM, RPLJ, RPLI, RPSC, RPSA, RPSB, RPSK, RPSL, RPSI, RPSJ, RPSG, RPSH, RPSF, RPSS, RPST, RPSQ, RPSR, RPSO, RPSP, RPSM, RPSN, PTH, YBEY, RPLT, RPLU, RPLR, RPLS, DEF, RPLP, RPLQ, RPLN, RPLO, RPLX, RPLY, RPLV, RPLW, RPME, RPMF, RPMC, RPMA, RPMB, RPMI, RPMJ, RPMG, RPMH	276	64	3277	9.46145	1.10249e-40	1.10249e-40	1.05129e-40
KEGG_PATHWAY	eco03010:Ribosome	52	18.4397	1.01797e-29	RPSU, RPLD, RPLE, RPLB, RPLC, RPLL, RPLM, RPLJ, RPLK, RPLI, RPLF, RPSC, RPSD, RPSA, RPSB, RPSK, RPSL, RPSI, RPSJ, RPSG, RPSH, RPSE, RPSF, RPSS, RPST, RPSQ, RPSR, RPSO, RPSP, RPSM, RPSN, RPLT, RPLU, RPLR, RPLS, RPLP, RPLQ, RPLN, RPLO, RPLX, RPLY, RPLV, RPLW, RPME, RPMF, RPMC, RPMA, RPMB, RPMI, RPMJ, RPMG, RPMH	198	78	1564	5.26599	5.70062e-28	5.70062e-28	4.58085e-28
Annotation Cluster 2	Enrichment Score: 9.635902772916394
Category	Term	Count	%	PValue	Genes	List Total	Pop Hits	Pop Total	Fold Enrichment	Bonferroni	Benjamini	FDR
UP_KEYWORDS	Quinone	13	4.60993	9.38607e-14	NUOL, NUOM, NUON, NUOH, NUOI, NUOJ, NUOK, NUOE, NUOF, NUOG, NUOA, NUOB, NUOC	282	13	4139	14.6773	1.58545e-11	1.58625e-12	1.18264e-12
UP_KEYWORDS	Ubiquinone	13	4.60993	6.17107e-13	NUOL, NUOM, NUON, NUOH, NUOI, NUOJ, NUOK, NUOE, NUOF, NUOG, NUOA, NUOB, NUOC	282	14	4139	13.6289	1.04283e-10	9.48101e-12	7.06868e-12
GOTERM_CC_DIRECT	GO:0045272~plasma membrane respiratory chain complex I	13	4.60993	3.7373e-12	NUOL, NUOM, NUON, NUOH, NUOI, NUOJ, NUOK, NUOE, NUOF, NUOG, NUOA, NUOB, NUOC	273	13	2941	10.7729	1.90605e-10	4.76506e-11	3.92416e-11
GOTERM_CC_DIRECT	GO:0030964~NADH dehydrogenase complex	13	4.60993	2.40182e-11	NUOL, NUOM, NUON, NUOH, NUOI, NUOJ, NUOK, NUOE, NUOF, NUOG, NUOA, NUOB, NUOC	273	14	2941	10.0034	1.22492e-09	2.44985e-10	2.01753e-10
GOTERM_MF_DIRECT	GO:0048038~quinone binding	12	4.25532	1.26656e-08	NUOL, NUON, NUOH, NUOI, NUOJ, NUOK, NUOE, NUOF, NUOG, NUOA, NUOB, NUOC	276	17	3186	8.14834	3.939e-06	7.87801e-07	7.47271e-07
GOTERM_MF_DIRECT	GO:0008137~NADH dehydrogenase (ubiquinone) activity	11	3.90071	4.59738e-07	NUOL, NUOM, NUON, NUOJ, NUOK, NUOE, NUOF, NUOG, NUOA, NUOB, NUOC	276	18	3186	7.05435	0.000142968	2.38298e-05	2.26038e-05
GOTERM_MF_DIRECT	GO:0003954~NADH dehydrogenase activity	13	4.60993	1.16843e-06	NUOL, NUOM, NUON, NUOH, NUOI, NUOJ, NUOK, NUOE, NUOF, NUOG, NUOA, NUOB, NUOC	276	28	3186	5.35947	0.000363315	5.19116e-05	4.92409e-05
Annotation Cluster 3	Enrichment Score: 8.326926332251036
Category	Term	Count	%	PValue	Genes	List Total	Pop Hits	Pop Total	Fold Enrichment	Bonferroni	Benjamini	FDR
UP_SEQ_FEATURE	short sequence motif:"HIGH" region	10	3.5461	1.29933e-09	TYRS, ILES, ARGS, LEUS, TRPS, GLTX, CYSS, VALS, GLNS, METG	282	11	4147	13.3688	7.43219e-07	3.72259e-07	3.72259e-07
INTERPRO	IPR001412:Aminoacyl-tRNA synthetase, class I, conserved site	9	3.19149	4.98544e-09	TYRS, ILES, ARGS, LEUS, TRPS, GLTX, VALS, GLNS, METG	282	9	3956	14.0284	4.78103e-06	2.39052e-06	2.38055e-06
UP_SEQ_FEATURE	short sequence motif:"KMSKS" region	9	3.19149	1.6136e-08	TYRS, ILES, LEUS, TRPS, GLTX, CYSS, VALS, GLNS, METG	282	10	4147	13.2351	9.22976e-06	2.31148e-06	2.31148e-06
Annotation Cluster 4	Enrichment Score: 7.817773730364259
Category	Term	Count	%	PValue	Genes	List Total	Pop Hits	Pop Total	Fold Enrichment	Bonferroni	Benjamini	FDR
UP_KEYWORDS	Nucleotide-binding	70	24.8227	3.823e-10	HISS, GYRA, FTSH, PHET, PHES, INFB, GYRB, CLPB, RNC, GLTX, RUVB, LEPA, DNAB, LYSS, THRS, DNAK, SECA, MIAA, TILS, ACCC, GLYQ, ACCD, ACCA, GLYS, CMK, TYRS, GMK, TRPS, HINT, GROL, BIRA, LON, ASPS, CLPX, GUAA, METG, THII, ILES, PGK, SERS, SUFC, PYKA, ARGS, PROS, CYSS, GLNS, MNMA, AROK, OBGE, RHO, TUFB, VALS, PYRH, MNME, CCA, NRDA, ASNS, PFKA, GAPA, DER, RECD, TMK, LEUS, RECB, RECC, ATPA, FUSA, MURC, …	282	486	4139	2.11402	6.46086e-08	5.38405e-09	4.01414e-09
UP_KEYWORDS	ATP-binding	61	21.6312	2.6771e-09	HISS, GYRA, FTSH, PHET, PHES, GYRB, CLPB, RNC, GLTX, RUVB, DNAB, LYSS, THRS, DNAK, SECA, MIAA, TILS, ACCC, GLYQ, ACCD, ACCA, GLYS, CMK, TYRS, GMK, TRPS, GROL, BIRA, LON, ASPS, CLPX, GUAA, METG, THII, ILES, PGK, SERS, SUFC, PYKA, ARGS, PROS, CYSS, GLNS, MNMA, AROK, RHO, VALS, PYRH, CCA, NRDA, ASNS, PFKA, RECD, TMK, LEUS, RECB, RECC, ATPA, MURC, MURD, MURE	282	412	4139	2.1731	4.52429e-07	3.48022e-08	2.59472e-08
GOTERM_MF_DIRECT	GO:0005524~ATP binding	65	23.0496	3.44042e-06	HISS, GYRA, FTSH, PHET, PHES, GYRB, CLPB, RNC, GLTX, RUVB, DNAB, LYSS, THRS, DNAJ, DNAK, SECA, MIAA, TILS, ACCC, GLYQ, ACCD, ACCA, GLYS, CMK, TYRS, GMK, TRPS, GROL, BIRA, LON, ASPS, GROS, CLPX, GUAA, METG, THII, ILES, PGK, SERS, SUFC, PYKA, ARGS, PROS, CYSS, GLNS, MNMA, AROK, RHO, VALS, PYRH, CCA, NRDA, ASNS, PFKA, RECD, TMK, ATPG, LEUS, RECB, RECC, ATPC, ATPA, MURC, MURD, MURE	276	433	3186	1.73285	0.0010694	0.000133746	0.000126865
Annotation Cluster 5	Enrichment Score: 5.6893635327645375
Category	Term	Count	%	PValue	Genes	List Total	Pop Hits	Pop Total	Fold Enrichment	Bonferroni	Benjamini	FDR
UP_KEYWORDS	Glycolysis	12	4.25532	5.41246e-09	LPD, TPIA, PGI, PGK, ENO, PFKA, PYKA, GAPA, GPMA, FBAA, ACEE, ACEF	282	19	4139	9.26988	9.14706e-07	6.09804e-08	4.54647e-08
GOTERM_BP_DIRECT	GO:0006096~glycolytic process	12	4.25532	1.97367e-07	LPD, TPIA, PGI, PGK, ENO, PFKA, PYKA, GAPA, GPMA, FBAA, ACEE, ACEF	276	21	3277	6.78468	6.37476e-05	3.18748e-05	3.03946e-05
KEGG_PATHWAY	eco00010:Glycolysis / Gluconeogenesis	12	4.25532	0.00800275	LPD, TPIA, PGI, PGK, ENO, PFKA, PYKA, GAPA, GPMA, FBAA, ACEE, ACEF	198	40	1564	2.3697	0.362344	0.0494273	0.0397184
Annotation Cluster 6	Enrichment Score: 5.534171454834353
Category	Term	Count	%	PValue	Genes	List Total	Pop Hits	Pop Total	Fold Enrichment	Bonferroni	Benjamini	FDR
UP_KEYWORDS	Fatty acid biosynthesis	10	3.5461	9.42385e-08	FABG, FABI, FABB, ACPS, ACPP, ACCC, ACCD, FABD, ACCA, ACCB	282	15	4139	9.78487	1.59262e-05	9.95394e-07	7.42128e-07
GOTERM_BP_DIRECT	GO:0006633~fatty acid biosynthetic process	10	3.5461	4.48914e-06	FABG, FABZ, FABB, ACPS, ACPP, ACCC, ACCD, FABD, ACCA, ACCB	276	18	3277	6.59622	0.00144895	0.000483331	0.000460885
UP_KEYWORDS	Fatty acid metabolism	10	3.5461	5.90328e-05	FABG, FABI, FABB, ACPS, ACPP, ACCC, ACCD, FABD, ACCA, ACCB	282	28	4139	5.24189	0.00992724	0.00041569	0.000309922
Annotation Cluster 7	Enrichment Score: 5.089677292383941
Category	Term	Count	%	PValue	Genes	List Total	Pop Hits	Pop Total	Fold Enrichment	Bonferroni	Benjamini	FDR
UP_KEYWORDS	ATP synthesis	7	2.48227	6.56081e-06	ATPG, ATPH, ATPE, ATPF, ATPC, ATPA, ATPB	282	9	4139	11.4157	0.00110817	5.54388e-05	4.13331e-05
UP_KEYWORDS	Hydrogen ion transport	8	2.83688	7.43437e-06	ATPG, ATPH, CYOB, ATPE, ATPF, ATPC, ATPA, ATPB	282	13	4139	9.03219	0.00125562	5.9829e-05	4.46062e-05
GOTERM_MF_DIRECT	GO:0046933~proton-transporting ATP synthase activity, rotational mechanism	7	2.48227	9.47425e-06	ATPG, ATPH, ATPE, ATPF, ATPC, ATPA, ATPB	276	8	3186	10.1005	0.00294217	0.000294649	0.00027949
GOTERM_MF_DIRECT	GO:0046961~proton-transporting ATPase activity, rotational mechanism	7	2.48227	9.47425e-06	ATPG, ATPH, ATPE, ATPF, ATPC, ATPA, ATPB	276	8	3186	10.1005	0.00294217	0.000294649	0.00027949
Annotation Cluster 8	Enrichment Score: 2.4084068009168673
Category	Term	Count	%	PValue	Genes	List Total	Pop Hits	Pop Total	Fold Enrichment	Bonferroni	Benjamini	FDR
GOTERM_BP_DIRECT	GO:0009423~chorismate biosynthetic process	6	2.12766	0.00121517	AROK, AROG, AROE, AROB, AROC, AROA	276	11	3277	6.47628	0.324795	0.0327083	0.0311893
GOTERM_BP_DIRECT	GO:0009073~aromatic amino acid family biosynthetic process	6	2.12766	0.00426533	AROK, AROG, AROE, AROB, AROC, AROA	276	14	3277	5.08851	0.748585	0.0810413	0.0772778
UP_KEYWORDS	Aromatic amino acid biosynthesis	6	2.12766	0.0114866	AROK, AROG, AROE, AROB, AROC, AROA	282	21	4139	4.19352	0.858076	0.0485307	0.0361827
Annotation Cluster 9	Enrichment Score: 2.377157259569173
Category	Term	Count	%	PValue	Genes	List Total	Pop Hits	Pop Total	Fold Enrichment	Bonferroni	Benjamini	FDR
INTERPRO	IPR022967:RNA-binding domain, S1	5	1.77305	0.00138788	NUSA, INFA, PNP, RNE, RPSA	282	8	3956	8.76773	0.736026	0.166373	0.165679
SMART	SM00316:SM00316	5	1.77305	0.00350559	NUSA, INFA, PNP, RNE, RPSA	74	8	792	6.68919	0.234245	0.266425	0.266425
INTERPRO	IPR003029:Ribosomal protein S1, RNA-binding domain	4	1.41844	0.0151849	NUSA, PNP, RNE, RPSA	282	8	3956	7.01418	1	0.661926	0.659165
Annotation Cluster 10	Enrichment Score: 2.125486726560838
Category	Term	Count	%	PValue	Genes	List Total	Pop Hits	Pop Total	Fold Enrichment	Bonferroni	Benjamini	FDR
UP_KEYWORDS	Cell shape	12	4.25532	0.000272404	MRED, MURJ, MREB, MRDA, MREC, MRAY, MURG, MURB, ISPU, MURC, MURD, MURE	282	48	4139	3.66933	0.0449986	0.00170505	0.00127122
GOTERM_BP_DIRECT	GO:0008360~regulation of cell shape	12	4.25532	0.00192591	MRED, MURJ, MREB, MRDA, MREC, MRAY, MURG, MURB, ISPU, MURC, MURD, MURE	276	49	3277	2.90772	0.46349	0.0478515	0.0456293
UP_KEYWORDS	Peptidoglycan synthesis	9	3.19149	0.00464738	MURJ, MRDA, MRAY, MURG, MURB, ISPU, MURC, MURD, MURE	282	40	4139	3.30239	0.5449	0.0224402	0.0167306
GOTERM_BP_DIRECT	GO:0009252~peptidoglycan biosynthetic process	9	3.19149	0.0310701	MURJ, MRDA, MRAY, MURG, MURB, ISPU, MURC, MURD, MURE	276	45	3277	2.37464	0.999963	0.326539	0.311375
UP_KEYWORDS	Cell wall biogenesis/degradation	9	3.19149	0.0479471	MURJ, MRDA, MRAY, MURG, MURB, ISPU, MURC, MURD, MURE	282	60	4139	2.2016	0.999752	0.152888	0.113987
KEGG_PATHWAY	eco00550:Peptidoglycan biosynthesis	7	2.48227	0.0486313	MRDA, MRAY, MURG, MURB, MURC, MURD, MURE	198	22	1564	2.51331	0.938689	0.181557	0.145894
Annotation Cluster 11	Enrichment Score: 1.842342935652062
Category	Term	Count	%	PValue	Genes	List Total	Pop Hits	Pop Total	Fold Enrichment	Bonferroni	Benjamini	FDR
INTERPRO	IPR002300:Aminoacyl-tRNA synthetase, class Ia	3	1.06383	0.0143766	ILES, LEUS, VALS	282	3	3956	14.0284	0.999999	0.656533	0.653794
INTERPRO	IPR013155:Valyl/Leucyl/Isoleucyl-tRNA synthetase, class I, anticodon-binding	3	1.06383	0.0143766	ILES, LEUS, VALS	282	3	3956	14.0284	0.999999	0.656533	0.653794
INTERPRO	IPR009008:Valyl/Leucyl/Isoleucyl-tRNA synthetase, class Ia, editing domain	3	1.06383	0.0143766	ILES, LEUS, VALS	282	3	3956	14.0284	0.999999	0.656533	0.653794
Annotation Cluster 12	Enrichment Score: 1.7717193162322835
Category	Term	Count	%	PValue	Genes	List Total	Pop Hits	Pop Total	Fold Enrichment	Bonferroni	Benjamini	FDR
GOTERM_BP_DIRECT	GO:0007049~cell cycle	9	3.19149	0.00841356	MRAY, GROL, MURG, MURB, ISPU, MURC, GROS, MURD, MURE	276	36	3277	2.9683	0.93472	0.14303	0.136388
UP_KEYWORDS	Cell cycle	10	3.5461	0.0205504	NLPD, MRAY, GROL, MURG, MURB, ISPU, MURC, GROS, MURD, MURE	282	61	4139	2.40612	0.970079	0.073894	0.0550925
UP_KEYWORDS	Cell division	10	3.5461	0.0205504	NLPD, MRAY, GROL, MURG, MURB, ISPU, MURC, GROS, MURD, MURE	282	61	4139	2.40612	0.970079	0.073894	0.0550925
GOTERM_BP_DIRECT	GO:0051301~cell division	11	3.90071	0.0230411	MRAY, GROL, MURG, PAL, MURB, ISPU, MURC, GROS, CLPX, MURD, MURE	276	59	3277	2.21365	0.999463	0.265795	0.253452
Annotation Cluster 13	Enrichment Score: 1.7396036545806663
Category	Term	Count	%	PValue	Genes	List Total	Pop Hits	Pop Total	Fold Enrichment	Bonferroni	Benjamini	FDR
INTERPRO	IPR004365:Nucleic acid binding, OB-fold, tRNA/helicase-type	4	1.41844	0.00318455	ASNS, ASPS, LYSS, DNAE	282	5	3956	11.2227	0.953059	0.339332	0.337916
INTERPRO	IPR004364:Aminoacyl-tRNA synthetase, class II (D/K/N)	3	1.06383	0.0435583	ASNS, ASPS, LYSS	282	5	3956	8.41702	1	1	0.996868
INTERPRO	IPR018150:Aminoacyl-tRNA synthetase, class II (D/K/N)-like	3	1.06383	0.0435583	ASNS, ASPS, LYSS	282	5	3956	8.41702	1	1	0.996868
Annotation Cluster 14	Enrichment Score: 1.578207403663476
Category	Term	Count	%	PValue	Genes	List Total	Pop Hits	Pop Total	Fold Enrichment	Bonferroni	Benjamini	FDR
GOTERM_MF_DIRECT	GO:0008854~exodeoxyribonuclease V activity	3	1.06383	0.0210033	RECD, RECB, RECC	276	3	3186	11.5435	0.998642	0.241927	0.22948
GOTERM_CC_DIRECT	GO:0009338~exodeoxyribonuclease V complex	3	1.06383	0.0240087	RECD, RECB, RECC	273	3	2941	10.7729	0.710437	0.111313	0.0916697
GOTERM_MF_DIRECT	GO:0004003~ATP-dependent DNA helicase activity	4	1.41844	0.0256791	RECD, RECB, RECC, RUVB	276	8	3186	5.77174	0.999694	0.275387	0.261219
GOTERM_BP_DIRECT	GO:0000724~double-strand break repair via homologous recombination	3	1.06383	0.037578	RECD, RECB, RECC	276	4	3277	8.90489	0.999996	0.367809	0.350728
Annotation Cluster 15	Enrichment Score: 1.4758874231293209
Category	Term	Count	%	PValue	Genes	List Total	Pop Hits	Pop Total	Fold Enrichment	Bonferroni	Benjamini	FDR
UP_KEYWORDS	DNA-directed RNA polymerase	4	1.41844	0.00530844	DNAG, RPOC, RPOA, RPOB	282	6	4139	9.78487	0.593233	0.0249202	0.0185795
KEGG_PATHWAY	eco03020:RNA polymerase	3	1.06383	0.0797317	RPOC, RPOA, RPOB	198	4	1564	5.92424	0.990467	0.279061	0.224245
GOTERM_MF_DIRECT	GO:0003899~DNA-directed RNA polymerase activity	3	1.06383	0.0882552	RPOC, RPOA, RPOB	276	6	3186	5.77174	1	0.703778	0.667571
Annotation Cluster 16	Enrichment Score: 1.45691041887915
Category	Term	Count	%	PValue	Genes	List Total	Pop Hits	Pop Total	Fold Enrichment	Bonferroni	Benjamini	FDR
GOTERM_MF_DIRECT	GO:0004129~cytochrome-c oxidase activity	3	1.06383	0.0210033	CYOC, CYOB, CYOA	276	3	3186	11.5435	0.998642	0.241927	0.22948
GOTERM_MF_DIRECT	GO:0009486~cytochrome bo3 ubiquinol oxidase activity	3	1.06383	0.0396231	CYOC, CYOB, CYOA	276	4	3186	8.65761	0.999997	0.362434	0.343788
GOTERM_MF_DIRECT	GO:0015453~oxidoreduction-driven active transmembrane transporter activity	3	1.06383	0.0396231	CYOC, CYOB, CYOA	276	4	3186	8.65761	0.999997	0.362434	0.343788
GOTERM_CC_DIRECT	GO:0009319~cytochrome o ubiquinol oxidase complex	3	1.06383	0.0450999	CYOC, CYOB, CYOA	273	4	2941	8.07967	0.904971	0.17693	0.145707

## Sheet: S2 - PATHWAYS
Pathway and Functional Completness Checking
				Blochmannia Genomes				Hugann Genomes			Jungenella Genomes		Westeberhardia Genomes
Pathway	MetaCyc Pathway	Step #	Gene/Genes	GCA_000011745.1_Blochmannia_pennsylvanicus	GCA_000043285.1_Blochmannia_floridanus	GCA_000185985.2_Blochmannia_vafer	GCA_000331065.1_Blochmannia_chromaiodes	Formica fusca bound	Formica lemani bound	Formica selysi bound	Plagiolepis pygmae bound	Plagiolepis sp. bound	Cardiocondyla mauritannica bound	Cardiocondyla minutior bound	Cardiocondyla wroughtonii bound	GCA_001242845.1_Westeberhardia_obscurior
Alanine	Superpathway of L-alanine biosynthesis	1	iscS/sufS/alaA/alaC/ilvE+avtA	nifS	nifS	iscS	iscS	iscS	iscS	iscS	iscS	iscS	iscS	iscS	iscS	iscS
Alanine	Superpathway of L-alanine biosynthesis	1	iscS/sufS/alaA/alaC/ilvE+avtA	sufS	sufS	sufS	sufS	sufS	sufS	sufS	sufS	sufS	sufS	sufS	sufS	sufS
Alanine	Superpathway of L-alanine biosynthesis	1	iscS/sufS/alaA/alaC/ilvE+avtA
Alanine	Superpathway of L-alanine biosynthesis	1	iscS/sufS/alaA/alaC/ilvE+avtA	ilvE	ilvE	ilvE	ilvE	ilvE	ilvE	ilvE	ilvE	ilvE
Arginine	L-arginine biosynthesis I (via L-ornithine)	1	argA					argA	argA	argA
Arginine	L-arginine biosynthesis I (via L-ornithine)	2	argB					argB	argB	argB
Arginine	L-arginine biosynthesis I (via L-ornithine)	3	argC					argC	argC	argC
Arginine	L-arginine biosynthesis I (via L-ornithine)	4	argD					argD	argD	argD
Arginine	L-arginine biosynthesis I (via L-ornithine)	5	argE					argE	argE	argE
Arginine	L-arginine biosynthesis I (via L-ornithine)	5	argE
Arginine	L-arginine biosynthesis I (via L-ornithine)	6	carA+carB	carA	carA	carA	carA	carA	carA	carA	carA	carA
Arginine	L-arginine biosynthesis I (via L-ornithine)	6	carA+carB	carB	carB	carB	carB	carB	carB	carB	carB	carB
Arginine	L-arginine biosynthesis I (via L-ornithine)	7	argI/argF	argI	argI	argI	argI	argI	argI	argI
Arginine	L-arginine biosynthesis I (via L-ornithine)	8	argH					argH	argH	argH
Asparagine	superpathway of L-aspartate and L-asparagine biosynthesis	1	asnB/asnA					asnB	asnB	asnB
Aspartate	superpathway of L-aspartate and L-asparagine biosynthesis	1	aspC/aspA	aspC	aspC	aspC	aspC	aspC	aspC	aspC
B1 (thiamine diphosphate)	thiamine diphosphate biosynthesis I (E. coli)	1	thiE								thiE	thiE
B1 (thiamine diphosphate)	thiamine diphosphate biosynthesis I (E. coli)	2	thiL								thiL	thiL
B2 (Flavin)	flavin biosynthesis I (bacteria and plants)	1	ribA	ribA	ribA	ribA	ribA	ribA	ribA	ribA	ribA	ribA
B2 (Flavin)	flavin biosynthesis I (bacteria and plants)	2	ribD	ribD	ribD	ribD	ribD	ribD	ribD	ribD	ribD	ribD
B2 (Flavin)	flavin biosynthesis I (bacteria and plants)	3	ribD	ribD	ribD	ribD	ribD	ribD	ribD	ribD	ribD	ribD
B2 (Flavin)	flavin biosynthesis I (bacteria and plants)	4	yigB/yigL	yigB	yigB	yigB	yigB
B2 (Flavin)	flavin biosynthesis I (bacteria and plants)	4	yigB/yigL	yigL	yigL	yigL	yigL	yigL	yigL	yigL	yigL	yigL
B2 (Flavin)	flavin biosynthesis I (bacteria and plants)	5	ribB	ribB	ribB	ribB	ribB	ribB	ribB	ribB	ribB	ribB
B2 (Flavin)	flavin biosynthesis I (bacteria and plants)	6	ribE/ribH	ribH	ribH	ribH	ribH	ribE	ribE	ribE	ribE	ribE
B2 (Flavin)	flavin biosynthesis I (bacteria and plants)	7	ribE/ribC	ribE	ribE	ribE	ribE	ribC	ribC	ribC	ribC	ribC
B2 (Flavin)	flavin biosynthesis I (bacteria and plants)	8	ribF	ribF	ribF	ribF	ribF	ribF	ribF	ribF	ribF	ribF
B2 (Flavin)	flavin biosynthesis I (bacteria and plants)	9	ribF	ribF	ribF	ribF	ribF	ribF	ribF	ribF	ribF	ribF
B5 (phosphopantothenate)	phosphopantothenate biosynthesis I	1	panB
B5 (phosphopantothenate)	phosphopantothenate biosynthesis I	2	panE/ilvC	ilvC	ilvC	ilvC	ilvC	ilvC	ilvC	ilvC	ilvC	ilvC
B5 (phosphopantothenate)	phosphopantothenate biosynthesis I	3	panC
B5 (phosphopantothenate)	phosphopantothenate biosynthesis I	4	coaA	coaA			coaA	coaA	coaA	coaA	coaA	coaA
B6 (pyridoxal 5'-phosphate)	pyridoxal 5'-phosphate biosynthesis I	1	epd
B6 (pyridoxal 5'-phosphate)	pyridoxal 5'-phosphate biosynthesis I	2	pdxB	pdxB	pdxB	pdxB	pdxB	pdxB	pdxB	pdxB	pdxB	pdxB
B6 (pyridoxal 5'-phosphate)	pyridoxal 5'-phosphate biosynthesis I	3	serC	serC	serC	serC	serC	serC	serC	serC	serC	serC
B6 (pyridoxal 5'-phosphate)	pyridoxal 5'-phosphate biosynthesis I	3	serC
B6 (pyridoxal 5'-phosphate)	pyridoxal 5'-phosphate biosynthesis I	4	pdxA	pdxA	pdxA	pdxA	pdxA	pdxA	pdxA	pdxA	pdxA	pdxA
B6 (pyridoxal 5'-phosphate)	pyridoxal 5'-phosphate biosynthesis I	5	dxs	dxs	dxs	dxs	dxs	dxs	dxs	dxs	dxs	dxs
B6 (pyridoxal 5'-phosphate)	pyridoxal 5'-phosphate biosynthesis I	6	pdxJ	yfjG	yfjG	yfjG	yfjG	ratA	ratA	ratA	ratA	ratA
B6 (pyridoxal 5'-phosphate)	pyridoxal 5'-phosphate biosynthesis I	6	pdxJ	pdxJ	pdxJ	pdxJ	pdxJ	pdxJ	pdxJ	pdxJ	pdxJ	pdxJ
B6 (pyridoxal 5'-phosphate)	pyridoxal 5'-phosphate biosynthesis I	7	pdxH	pdxH	pdxH	pdxH	pdxH	pdxH	pdxH	pdxH	pdxH	pdxH
B7 (biotin)	Biotin biosynthesis I	1	bioC
B7 (biotin)	Biotin biosynthesis I	2	fabG	fabG	fabG	fabG	fabG	fabG	fabG	fabG	fabG	fabG	fabG	fabG	fabG	fabG
B7 (biotin)	Biotin biosynthesis I	2	fabG
B7 (biotin)	Biotin biosynthesis I	3	fabZ	fabZ	fabZ	fabZ	fabZ	fabZ	fabZ	fabZ	fabZ	fabZ	fabZ	fabZ	fabZ	fabZ
B7 (biotin)	Biotin biosynthesis I	4	fabI	fabI	fabI	fabI	fabI	fabI	fabI	fabI	fabI	fabI	fabI	fabI	fabI	fabI
B7 (biotin)	Biotin biosynthesis I	5	fabB	fabB	fabB	fabB	fabB	fabB	fabB	fabB	fabB	fabB	fabB	fabB	fabB	fabB
B7 (biotin)	Biotin biosynthesis I	6	fabG	fabG	fabG	fabG	fabG	fabG	fabG	fabG	fabG	fabG	fabG	fabG	fabG	fabG
B7 (biotin)	Biotin biosynthesis I	6	fabG
B7 (biotin)	Biotin biosynthesis I	7	fabZ	fabZ	fabZ	fabZ	fabZ	fabZ	fabZ	fabZ	fabZ	fabZ	fabZ	fabZ	fabZ	fabZ
B7 (biotin)	Biotin biosynthesis I	8	fabI	fabI	fabI	fabI	fabI	fabI	fabI	fabI	fabI	fabI	fabI	fabI	fabI	fabI
B7 (biotin)	Biotin biosynthesis I	9	bioH					bioH	bioH	bioH
B7 (biotin)	Biotin biosynthesis I	10	bioF
B7 (biotin)	Biotin biosynthesis I	11	bioA
B7 (biotin)	Biotin biosynthesis I	12	bioD
B7 (biotin)	Biotin biosynthesis I	13	bioB
B7 (biotin)	Biotin biosynthesis I	14	bioB
B9 (Tetrahydrofolate)	tetrahydrofolate biosynthesis	1	folP	folP	folP	folP	folP	folP	folP	folP	folP	folP			folP	folP
B9 (Tetrahydrofolate)	tetrahydrofolate biosynthesis	2	folC	folC	folC	folC	folC	folC	folC	folC	folC	folC			folC	folC
B9 (Tetrahydrofolate)	tetrahydrofolate biosynthesis	3	folA/folM	folA	folA	folA	folA	folA	folA	folA	folA	folA			folA	folA
Chorismate	chorismate biosynthesis I	1	aroG/aroH/aroF	aroF	aroF	aroF	aroF	aroG	aroG	aroG	aroG	aroG	aroF	aroF	aroF	aroF
Chorismate	chorismate biosynthesis I	2	aroB	aroB	aroB	aroB	aroB	aroB	aroB	aroB	aroB	aroB	aroB	aroB	aroB	aroB
Chorismate	chorismate biosynthesis I	3	aroD/aroQ	aroQ	aroQ	aroQ	aroQ	aroQ	aroQ	aroQ	aroQ	aroQ	aroQ	aroQ1	aroQ	aroQ
Chorismate	chorismate biosynthesis I	4	aroE	aroE	aroE	aroE	aroE	aroE	aroE	aroE	aroE	aroE	aroE	aroE	aroE	aroE
Chorismate	chorismate biosynthesis I	5	aroL/aroK								aroL	aroL
Chorismate	chorismate biosynthesis I	5	aroL/aroK	aroK	aroK	aroK	aroK	aroK	aroK	aroK	aroK	aroK	aroK	aroK	aroK	aroK
Chorismate	chorismate biosynthesis I	6	aroA	aroA	aroA	aroA	aroA	aroA	aroA	aroA	aroA	aroA	aroA	aroA	aroA	aroA
Chorismate	chorismate biosynthesis I	7	aroC	aroC	aroC	aroC	aroC	aroC	aroC	aroC	aroC	aroC	aroC	aroC	aroC	aroC
Cysteine	L-cysteine biosynthesis I	1	cysE	cysE	cysE	cysE	cysE	cysE	cysE	cysE	cysE	cysE
Cysteine	L-cysteine biosynthesis I	2	cysK/cysM	cysK	cysK	cysK	cysK	cysK	cysK	cysK	cysK	cysK
Glutamate	L-glutamate and L-glutamine biosynthesis	1	gdhA/gltB+gltD								gdhA	gdhA
Glutamine	L-glutamate and L-glutamine biosynthesis	1	glnA	glnA	glnA		glnA	glnA	glnA	glnA	glnA	glnA
Glycine	glycine biosynthesis I	1	glyA	glyA	glyA	glyA	glyA	glyA	glyA	glyA	glyA	glyA	glyA	glyA	glyA	glyA
Histidine	L-histidine biosynthesis	1	hisG	hisG	hisG	hisG	hisG	hisG	hisG	hisG	hisG	hisG
Histidine	L-histidine biosynthesis	2	hisI	hisI	hisI	hisI	hisI	hisI	hisI	hisI	hisI	hisI
Histidine	L-histidine biosynthesis	3	hisI	hisI	hisI	hisI	hisI	hisI	hisI	hisI	hisI	hisI
Histidine	L-histidine biosynthesis	4	hisA	hisA	hisA	hisA	hisA	hisA	hisA	hisA	hisA	hisA
Histidine	L-histidine biosynthesis	5	hisH+hisF	hisH	hisH	hisH	hisH	hisH	hisH	hisH	hisH	hisH
Histidine	L-histidine biosynthesis	5	hisH+hisF	hisF	hisF	hisF	hisF	hisF	hisF	hisF	hisF	hisF
Histidine	L-histidine biosynthesis	6	hisB	hisB	hisB	hisB	hisB	hisB	hisB	hisB	hisB	hisB
Histidine	L-histidine biosynthesis	7	hisD	hisD,hisC	hisD,hisC	hisD,hisC	hisD,hisC	hisD	hisD	hisD	hisC,hisD	hisC,hisD
Histidine	L-histidine biosynthesis	8	hisD	hisD,hisC	hisD,hisC	hisD,hisC	hisD,hisC	hisD	hisD	hisD	hisC,hisD	hisC,hisD
Isoleucine	L-isoleucine biosynthesis I (from threonine)	1	ilvA	ilvA	ilvA	ilvA	ilvA	ilvA	ilvA	ilvA
Isoleucine	L-isoleucine biosynthesis I (from threonine)	2	ilvI+ilvH/ilvM+ilvG/ilvB+ilvN	ilvG	ilvG	ilvG	ilvG	ilvI	ilvI	ilvI	ilvB	ilvB
Isoleucine	L-isoleucine biosynthesis I (from threonine)	2	ilvI+ilvH/ilvM+ilvG/ilvB+ilvN					ilvH	ilvH	ilvH
Isoleucine	L-isoleucine biosynthesis I (from threonine)	2	ilvI+ilvH/ilvM+ilvG/ilvB+ilvN	ilvM	ilvM	ilvM	ilvM				ilvM	ilvM
Isoleucine	L-isoleucine biosynthesis I (from threonine)	3	ilvC	ilvC	ilvC	ilvC	ilvC	ilvC	ilvC	ilvC	ilvC	ilvC
Isoleucine	L-isoleucine biosynthesis I (from threonine)	4	ilvD	ilvD	ilvD	ilvD	ilvD	ilvD	ilvD	ilvD	ilvD	ilvD
Isoleucine	L-isoleucine biosynthesis I (from threonine)	5	ilvE	ilvE	ilvE	ilvE	ilvE	ilvE	ilvE	ilvE	ilvE	ilvE
Leucine	L-leucine biosynthesis	1	leuA	leuA	leuA	leuA	leuA	leuA	leuA	leuA	leuA	leuA
Leucine	L-leucine biosynthesis	2	leuC+leuD	leuC	leuC	leuC	leuC	leuC	leuC	leuC	leuC	leuC
Leucine	L-leucine biosynthesis	2	leuC+leuD	leuD	leuD	leuD	leuD	leuD	leuD	leuD	leuD	leuD
Leucine	L-leucine biosynthesis	4	leuB/dmlA	leuB	leuB	leuB	leuB	leuB	leuB	leuB	leuB	leuB
Leucine	L-leucine biosynthesis	4	leuB/dmlA
Leucine	L-leucine biosynthesis	5	ilvE/tyrB	ilvE	ilvE	ilvE	ilvE	ilvE	ilvE	ilvE	ilvE	ilvE
Leucine	L-leucine biosynthesis	5	ilvE/tyrB								tyrB	tyrB
Lysine	L-lysine biosynthesis I	1	lysC/thrA/metL	thrA	thrA	thrA	thrA	thrA	thrA	thrA	thrA	thrA
Lysine	L-lysine biosynthesis I	2	asd	asd	asd	asd	asd	asd	asd	asd	asd	asd
Lysine	L-lysine biosynthesis I	3	dapA	dapA	dapA	dapA	dapA	dapA	dapA	dapA	dapA	dapA
Lysine	L-lysine biosynthesis I	4	dapB	dapB	dapB	dapB	dapB	dapB	dapB	dapB	dapB	dapB
Lysine	L-lysine biosynthesis I	5	dapD	dapD	dapD	dapD	dapD	dapD	dapD	dapD	dapD	dapD
Lysine	L-lysine biosynthesis I	6	serC/argD	serC	serC	serC	serC	serC	serC	serC	serC	serC
Lysine	L-lysine biosynthesis I	6	serC/argD					argD	argD	argD
Lysine	L-lysine biosynthesis I	7	dapE	dapE	dapE	dapE	dapE	dapE	dapE	dapE	dapE	dapE
Lysine	L-lysine biosynthesis I	8	dapF	dapF	dapF	dapF	dapF				dapF	dapF			dapF	dapF
Lysine	L-lysine biosynthesis I	9	lysA	lysA	lysA	lysA	lysA				lysA	lysA
Methionine	L-methionine biosynthesis I	1	metA	metA	metA	metA	metA				metA	metA
Methionine	L-methionine biosynthesis I	2	metB	metC,metB	metB,metC	metC,metB	metC,metB	metC	metC	metC	metB	metB
Methionine	L-methionine biosynthesis I	3	metC/malY	metC,metB	metB,metC	metC,metB	metC,metB	metC	metC	metC	metB	metB
Methionine	L-methionine biosynthesis I	3	metC/malY								malY	malY
Methionine	L-methionine biosynthesis I	4	metE/metH	metE	metE	metE	metE	metE	metE		metE	metE
Phenylalanine	L-phenylalanine biosynthesis I	1	tyrA/pheA	tyrA	tyrA	tyrA	tyrA	tyrA	tyrA	tyrA			tyrA	tyrA	tyrA	tyrA
Phenylalanine	L-phenylalanine biosynthesis I	1	tyrA/pheA	pheA	pheA	pheA	pheA	pheA	pheA	pheA	pheA	pheA
Phenylalanine	L-phenylalanine biosynthesis I	2	pheA	pheA	pheA	pheA	pheA	pheA	pheA	pheA	pheA	pheA
Phenylalanine	L-phenylalanine biosynthesis I	3	ilvE/aspC/tyrB	ilvE	ilvE	ilvE	ilvE	ilvE	ilvE	ilvE	ilvE	ilvE
Phenylalanine	L-phenylalanine biosynthesis I	3	ilvE/aspC/tyrB	aspC	aspC	aspC	aspC	aspC	aspC	aspC	tyrB	tyrB
Phenylalanine	L-phenylalanine biosynthesis I	3	ilvE/aspC/tyrB	aspC	aspC	aspC	aspC	aspC	aspC	aspC	tyrB	tyrB
Proline	L-proline biosynthesis I (from L-glutamate)	1	proB
Proline	L-proline biosynthesis I (from L-glutamate)	2	proA
Proline	L-proline biosynthesis I (from L-glutamate)	3	proC
Serine	L-serine biosynthesis I	1	serA	pdxB	pdxB	pdxB	pdxB	pdxB	pdxB	pdxB	pdxB	pdxB
Serine	L-serine biosynthesis I	2	serC	serC	serC	serC	serC	serC	serC	serC	serC	serC
Serine	L-serine biosynthesis I	2	serC
Serine	L-serine biosynthesis I	3	serB
Threonine	L-threonine biosynthesis	1	thrB	thrB	thrB	thrB	thrB	thrB	thrB	thrB	thrB	thrB
Threonine	L-threonine biosynthesis	1	thrB
Threonine	L-threonine biosynthesis	2	thrC	thrC	thrC	thrC	thrC	thrC	thrC	thrC	thrC	thrC
Tryptophan	L-tryptophan biosynthesis	1	trpE/trpD+pabA/pabB	trpG,pabA	pabA,trpG	trpG,pabA	trpG,pabA	pabA	pabA	pabA	pabA	pabA
Tryptophan	L-tryptophan biosynthesis	1	trpE/trpD+pabA/pabB	trpE,pabB	trpE,pabB	trpE,pabB	trpE,pabB	pabB	pabB	pabB	pabB	pabB
Tryptophan	L-tryptophan biosynthesis	1	trpE/trpD+pabA/pabB	trpG,pabA	pabA,trpG	trpG,pabA	trpG,pabA	pabA	pabA	pabA	pabA	pabA
Tryptophan	L-tryptophan biosynthesis	1	trpE/trpD+pabA/pabB	trpD	trpD	trpD	trpD
Tryptophan	L-tryptophan biosynthesis	1	trpE/trpD+pabA/pabB	trpG,pabA	pabA,trpG	trpG,pabA	trpG,pabA	pabA	pabA	pabA	pabA	pabA
Tryptophan	L-tryptophan biosynthesis	1	trpE/trpD+pabA/pabB	trpE,pabB	trpE,pabB	trpE,pabB	trpE,pabB	pabB	pabB	pabB	pabB	pabB
Tryptophan	L-tryptophan biosynthesis	2	trpD/pabA	trpG,pabA	pabA,trpG	trpG,pabA	trpG,pabA	pabA	pabA	pabA	pabA	pabA
Tryptophan	L-tryptophan biosynthesis	2	trpD/pabA	trpD	trpD	trpD	trpD
Tryptophan	L-tryptophan biosynthesis	3	trpC	trpC	trpC	trpC	trpC
Tryptophan	L-tryptophan biosynthesis	4	trpC	trpC	trpC	trpC	trpC
Tryptophan	L-tryptophan biosynthesis	5	trpA	trpA	trpA	trpA	trpA
Tryptophan	L-tryptophan biosynthesis	6	trpB	trpB	trpB	trpB	trpB
Tyrosine	L-tyrosine biosynthesis I	1	tyrA/pheA	tyrA	tyrA	tyrA	tyrA	tyrA	tyrA	tyrA			tyrA	tyrA	tyrA	tyrA
Tyrosine	L-tyrosine biosynthesis I	1	tyrA/pheA	pheA	pheA	pheA	pheA	pheA	pheA	pheA	pheA	pheA
Tyrosine	L-tyrosine biosynthesis I	2	tyrA	tyrA	tyrA	tyrA	tyrA	tyrA	tyrA	tyrA			tyrA	tyrA	tyrA	tyrA
Tyrosine	L-tyrosine biosynthesis I	3	aspC/tyrB	aspC	aspC	aspC	aspC	aspC	aspC	aspC	tyrB	tyrB
Valine	L-valine biosynthesis	1	ilvI+ilvH/ilvM+ilvG/ilvB+ilvN	ilvG	ilvG	ilvG	ilvG	ilvI	ilvI	ilvI	ilvB	ilvB
Valine	L-valine biosynthesis	1	ilvI+ilvH/ilvM+ilvG/ilvB+ilvN					ilvH	ilvH	ilvH
Valine	L-valine biosynthesis	1	ilvI+ilvH/ilvM+ilvG/ilvB+ilvN	ilvM	ilvM	ilvM	ilvM				ilvM	ilvM
Valine	L-valine biosynthesis	2	ilvC	ilvC	ilvC	ilvC	ilvC	ilvC	ilvC	ilvC	ilvC	ilvC
Valine	L-valine biosynthesis	3	ilvD	ilvD	ilvD	ilvD	ilvD	ilvD	ilvD	ilvD	ilvD	ilvD
Valine	L-valine biosynthesis	4	ilvE	ilvE	ilvE	ilvE	ilvE	ilvE	ilvE	ilvE	ilvE	ilvE
Urease Operon	-	0	ureA	ureA	ureA	ureA	ureA	ureA	ureA	ureA
Urease Operon	-	0	ureB	ureB	ureB	ureB	ureB
Urease Operon	-	0	ureC	ureC	ureC	ureC	ureC
Urease Operon	-	0	ureD	ureD	ureD	ureD	ureD
Urease Operon	-	0	ureE
Urease Operon	-	0	ureF	ureF	ureF	ureF	ureF
Urease Operon	-	0	ureG	ureG	ureG	ureG	ureG
Urease Operon	-	0	ureJ
Peptidoglycan	peptidoglycan biosynthesis I (meso-diaminopimelate containing)	A1	murA	murA	murA	murA	murA	murA	murA	murA	murA	murA
Peptidoglycan	peptidoglycan biosynthesis I (meso-diaminopimelate containing)	A2	murB	murB	murB	murB	murB	murB	murB	murB	murB	murB	murB	murB	murB	murB
Peptidoglycan	peptidoglycan biosynthesis I (meso-diaminopimelate containing)	A3	murC	murC	murC	murC	murC	murC	murC	murC	murC	murC	murC	murC	murC	murC
Peptidoglycan	peptidoglycan biosynthesis I (meso-diaminopimelate containing)	B1	murI	murI		murI	murI								murI	murI
Peptidoglycan	peptidoglycan biosynthesis I (meso-diaminopimelate containing)	4	murD	murD	murD	murD	murD	murD	murD	murD	murD	murD	murD	murD	murD	murD
Peptidoglycan	peptidoglycan biosynthesis I (meso-diaminopimelate containing)	C1	ddlA/ddlB	ddlA	ddlA	ddl	ddlA	ddlA	ddlA	ddlA	ddlA	ddlA			ddlA	ddlA
Peptidoglycan	peptidoglycan biosynthesis I (meso-diaminopimelate containing)	C1	ddlA/ddlB
Peptidoglycan	peptidoglycan biosynthesis I (meso-diaminopimelate containing)	5	murE	murE	murE	murE	murE	murE	murE	murE	murE	murE	murE	murE	murE	murE
Peptidoglycan	peptidoglycan biosynthesis I (meso-diaminopimelate containing)	6	murF	murF	murF	murF	murF	murF	murF	murF	murF	murF		murF	murF	murF
Peptidoglycan	peptidoglycan biosynthesis I (meso-diaminopimelate containing)	7	mraY	mraY	mraY	mraY	mraY	mraY	mraY	mraY	mraY	mraY	mraY	mraY	mraY	mraY
Peptidoglycan	peptidoglycan biosynthesis I (meso-diaminopimelate containing)	8	murG	murG	murG	murG	murG	murG	murG	murG	murG	murG	murG	murG	murG	murG
Type III secretion system	-	0	invA
Type III secretion system	-	0	invB
Type III secretion system	-	0	invC
Type III secretion system	-	0	spaM
Type III secretion system	-	0	spaP
Type III secretion system	-	0	spaQ
Type III secretion system	-	0	spaR
Quorum Sensing	-	0	yenR/ypeR
Quorum Sensing	-	0	yenR/ypeR
Quorum Sensing	-	0	ypeI
Transcription Factors	23S rRNA 2'-O-ribose G2251 methyltransferase	0	rlmB	rlmB	yjfH	rlmB	rlmB	rlmB	rlmB	rlmB	rlmB	rlmB	rlmB	rlmB	rlmB	rlmB
Transcription Factors	Dual-specificity RNA methyltransferase RlmN	0	rlmN	yfgB		rlmN	rlmN	rlmN	rlmN	rlmN	rlmN	rlmN		rlmN	rlmN	rlmN
Transcription Factors	Elongation factor G	0	fusA	fusA	fusA	fusA	fusA	fusA	fusA	fusA	fusA	fusA	fusA	fusA	fusA	fusA
Transcription Factors	Elongation factor Ts	0	tsf	tsf	tsf	tsf	tsf	tsf	tsf	tsf	tsf	tsf	tsf	tsf	tsf	tsf
Transcription Factors	Elongation factor Tu	0	tufA
Transcription Factors	GTPase Der	0	der	engA	engA	engA	engA	der	der	der	der	der	der	der	der	der
Transcription Factors	Peptide chain release factor 1	0	prfA	prfA	prfA	prfA	prfA	prfA	prfA	prfA	prfA	prfA	prfA	prfA	prfA	prfA
Transcription Factors	Peptide chain release factor 1	0	prfB	prfB	prfB	prfB	prfB	prfB	prfB	prfB	prfB	prfB	prfB	prfB	prfB	prfB
Transcription Factors	putative 50S ribosomal subunit protein L23	0	rplW	rplW	rplW	rplW	rplW	rplW	rplW	rplW	rplW	rplW	rplW	rplW	rplW	rplW
Transcription Factors	putative 50S ribosomal subunit protein L29	0	rpmC	rpmC	rpmC	rpmC	rpmC	rpmC	rpmC	rpmC	rpmC	rpmC	rpmC	rpmC	rpmC	rpmC
Transcription Factors	Release factor glutamine methyltransferase	0	prmC	hemK	hemK	hemK	hemK	prmC	prmC	prmC	prmC	prmC	prmC	prmC	prmC	prmC
Transcription Factors	ribosomal large subunit pseudouridine synthase C	0	rluC	rluC	rluC		rluC	rluC	rluC	rluC	rluC	rluC	rluC	rluC	rluC	ft
Transcription Factors	Ribosomal RNA large subunit methyltransferase E	0	rlmE	rrmJ	ftsJ	rlmE	rlmE	rlmE	rlmE	rlmE			rlmE	rlmE	rlmE	rlmE
Transcription Factors	Ribosomal silencing factor RsfS	0	rsfS	ybeB	ybeB	ybeB	ybeB
Transcription Factors	ribosome recycling factor	0	frr	frr	frr	frr	frr	frr	frr	frr	frr	frr	frr	frr	frr	frr
Transcription Factors	Translation initiation factor IF-1	0	infA	infA	infA	infA	infA	infA	infA	infA	infA	infA	infA	infA	infA	infA
Transcription Factors	Translation initiation factor IF-2	0	infB	infB	infB	infB	infB	infB	infB	infB	infB	infB	infB	infB	infB	infB
Transcription Factors	Translation initiation factor IF-3	0	infC	infC	infC	infC	infC	infC	infC	infC	infC	infC	infC	infC	infC	infC
Transcription Factors	tRNA delta(2)-isopentenylpyrophosphatetransferase	0	miaA	miaA	miaA	miaA	miaA	miaA	miaA	miaA	miaA	miaA	miaA	miaA	miaA	miaA
Transcription Factors	tRNA N6-adenosine threonylcarbamoyltransferase	0	tsaD	gcp	gcp	gcp	gcp	tsaD	tsaD	tsaD	tsaD	tsaD	tsaD	tsaD	tsaD	tsaD
Transcription Factors	tRNA-specific 2-thiouridylase MnmA	0	mnmA	trmU	trmU	mnmA	mnmA	mnmA	mnmA	mnmA	mnmA	mnmA	mnmA	mnmA	mnmA	mnmA
Transcription Factors	tRNA(Ile)-lysidine synthetase	0	tilS	tilS	mesJ	tilS	tilS	tilS	tilS	tilS	tilS	tilS	tilS	tilS	tilS	tilS
Transcription Factors-tRNA	alanyl-tRNA aminoacylation	0	alaS	alaS	alaS	alaS	alaS	alaS	alaS	alaS	alaS	alaS		alaS	alaS	alaS
Transcription Factors-tRNA	arginyl-tRNA synthetase	0	argS	argS	argS	argS	argS	argS	argS	argS	argS	argS	argS	argS	argS	argS
Transcription Factors-tRNA	asparaginyl-tRNA aminoacylation	0	asnS	asnS	asnS	asnS	asnS	asnS	asnS	asnS	asnS	asnS	asnS	asnS	asnS	asnS
Transcription Factors-tRNA	aspartyl-tRNA aminoacylation	0	aspS	aspS	aspS	aspS	aspS	aspS	aspS	aspS	aspS	aspS	aspS	aspS	aspS	aspS
Transcription Factors-tRNA	Cysteine--tRNA ligase	0	cysS	cysS	cysS	cysS	cysS	cysS	cysS	cysS	cysS	cysS		cysS	cysS	cysS
Transcription Factors-tRNA	lysyl-tRNA aminoacylation	0	epmA					epmA	epmA	epmA	epmA	epmA
Transcription Factors-tRNA	glutaminyl-tRNA synthetase	0	glnS	glnS	glnS	glnS	glnS	glnS	glnS	glnS	glnS	glnS	glnS	glnS	glnS	glnS
Transcription Factors-tRNA	glutamyl-tRNA synthetase	0	gltX	gltX	gltX	gltX	gltX	gltX	gltX	gltX	gltX	gltX	gltX	gltX	gltX	gltX
Transcription Factors-tRNA	glycyl-tRNA aminoacylation (subunit a)	0	glyQ	glyQ	glyQ	glyQ	glyQ	glyQ	glyQ	glyQ	glyQ	glyQ	glyQ	glyQ	glyQ	glyQ
Transcription Factors-tRNA	glycyl-tRNA aminoacylation (subunit B)	0	glyS	glyS	glyS	glyS	glyS	glyS	glyS	glyS	glyS	glyS	glyS	glyS	glyS	glyS
Transcription Factors-tRNA	histidyl-tRNA synthetase	0	hisS	hisS	hisS	hisS	hisS	hisS	hisS	hisS	hisS	hisS	hisS	hisS	hisS	hisS
Transcription Factors-tRNA	isoleucyl-tRNA synthetase	0	ileS	ileS	ileS	ileS	ileS	ileS	ileS	ileS	ileS	ileS	ileS	ileS	ileS	ileS
Transcription Factors-tRNA	leucyl-tRNA aminoacylation	0	leuS	leuS	leuS	leuS	leuS	leuS	leuS	leuS	leuS	leuS	leuS	leuS	leuS	leuS
Transcription Factors-tRNA	lysyl-tRNA aminoacylation	0	lysS/lysU	lysS	lysS	lysS	lysS	lysS	lysS	lysS	lysS	lysS	lysU	lysS	lysU	lysS
Transcription Factors-tRNA	methionyl-tRNA aminoacylation	0	metG	metG	metG	metG	metG	metG	metG	metG	metG	metG	metG	metG	metG	metG
Transcription Factors-tRNA	phenylalanyl-tRNA synthetase subunit alpha	0	pheS	pheS	pheS	pheS	pheS	pheS	pheS	pheS	pheS	pheS	pheS	pheS	pheS	pheS
Transcription Factors-tRNA	phenylalanyl-tRNA synthetase, beta subunit	0	pheT	pheT	pheT	pheT	pheT	pheT	pheT	pheT	pheT	pheT	pheT	pheT	pheT	pheT
Transcription Factors-tRNA	prolyl-tRNA synthetase	0	proS	proS	proS	proS	proS	proS	proS	proS	proS	proS	proS	proS	proS	proS
Transcription Factors-tRNA	seryl-tRNA synthetase	0	serS	serS	serS	serS	serS	serS	serS	serS	serS	serS	serS	serS	serS	serS
Transcription Factors-tRNA	threonyl-tRNA synthetase	0	thrS	thrS	thrS	thrS	thrS	thrS	thrS	thrS	thrS	thrS	thrS	thrS	thrS	thrS
Transcription Factors-tRNA	tryptophanyl-tRNA aminoacylation	0	trpS	trpS	trpS	trpS	trpS	trpS	trpS	trpS	trpS	trpS	trpS	trpS	trpS	trpS
Transcription Factors-tRNA	tyrosyl-tRNA aminoacylation	0	tyrS	tyrS	tyrS	tyrS	tyrS	tyrS	tyrS	tyrS	tyrS	tyrS	tyrS	tyrS	tyrS	tyrS
Transcription Factors-tRNA	valyl-tRNA synthetase	0	valS	valS	valS	valS	valS	valS	valS	valS	valS	valS	valS	valS	valS	valS
Transcription Factors-ribosome	30S ribosomal protein S1	0	rpsA	rpsA	rpsA	rpsA	rpsA	rpsA	rpsA	rpsA	rpsA	rpsA	rpsA	rpsA	rpsA	rpsA
Transcription Factors-ribosome	30S ribosomal protein S10	0	rpsJ	rpsJ	rpsJ	rpsJ	rpsJ	rpsJ	rpsJ	rpsJ	rpsJ	rpsJ	rpsJ	rpsJ	rpsJ	rpsJ
Transcription Factors-ribosome	30S ribosomal protein S11	0	rpsK	rpsK	rpsK	rpsK	rpsK	rpsK	rpsK	rpsK	rpsK	rpsK	rpsK	rpsK	rpsK	rpsK
Transcription Factors-ribosome	30S ribosomal protein S12	0	rpsL	rpsL	rpsL	rpsL	rpsL	rpsL	rpsL	rpsL	rpsL	rpsL	rpsL	rpsL	rpsL	rpsL
Transcription Factors-ribosome	30S ribosomal protein S13	0	rpsM	rpsM	rpsM	rpsM	rpsM	rpsM	rpsM	rpsM	rpsM	rpsM	rpsM	rpsM	rpsM	rpsM
Transcription Factors-ribosome	30S ribosomal protein S14	0	rpsN	rpsN	rpsN	rpsN	rpsN	rpsN	rpsN	rpsN	rpsN	rpsN	rpsN	rpsN	rpsN	rpsN
Transcription Factors-ribosome	30S ribosomal protein S15	0	rpsO	rpsO	rpsO	rpsO	rpsO	rpsO	rpsO	rpsO	rpsO	rpsO	rpsO	rpsO	rpsO	rpsO
Transcription Factors-ribosome	30S ribosomal protein S16	0	rpsP	rpsP	rpsP	rpsP	rpsP	rpsP	rpsP	rpsP	rpsP	rpsP	rpsP	rpsP	rpsP	rpsP
Transcription Factors-ribosome	30S ribosomal protein S17	0	rpsQ	rpsQ	rpsQ	rpsQ	rpsQ	rpsQ	rpsQ	rpsQ	rpsQ	rpsQ	rpsQ	rpsQ	rpsQ	rpsQ
Transcription Factors-ribosome	30S ribosomal protein S18	0	rpsR	rpsR	rpsR	rpsR	rpsR	rpsR	rpsR	rpsR	rpsR	rpsR	rpsR	rpsR	rpsR	rpsR
Transcription Factors-ribosome	30S ribosomal protein S19	0	rpsS	rpsS	rpsS	rpsS	rpsS	rpsS	rpsS	rpsS	rpsS	rpsS	rpsS	rpsS	rpsS	rpsS
Transcription Factors-ribosome	30S ribosomal protein S2	0	rpsB	rpsB	rpsB	rpsB	rpsB	rpsB	rpsB	rpsB	rpsB	rpsB	rpsB	rpsB	rpsB	rpsB
Transcription Factors-ribosome	30S ribosomal protein S20	0	rpsT	rpsT	rpsT	rpsT	rpsT	rpsT	rpsT	rpsT	rpsT	rpsT	rpsT	rpsT	rpsT	rpsT
Transcription Factors-ribosome	30S ribosomal protein S21	0	rpsU	rpsU	rpsU	rpsU	rpsU	rpsU	rpsU	rpsU	rpsU	rpsU	rpsU	rpsU	rpsU	rpsU
Transcription Factors-ribosome	30S ribosomal protein S3	0	rpsC	rpsC	rpsC	rpsC	rpsC	rpsC	rpsC	rpsC	rpsC	rpsC	rpsC	rpsC	rpsC	rpsC
Transcription Factors-ribosome	30S ribosomal protein S4	0	rpsD	rpsD	rpsD	rpsD	rpsD	rpsD	rpsD	rpsD	rpsD	rpsD	rpsD	rpsD	rpsD	rpsD
Transcription Factors-ribosome	30S ribosomal protein S5	0	rpsE	rpsE	rpsE	rpsE	rpsE	rpsE	rpsE	rpsE	rpsE	rpsE	rpsE	rpsE	rpsE	rpsE
Transcription Factors-ribosome	30S ribosomal protein S6	0	rpsF	rpsF	rpsF	rpsF	rpsF	rpsF	rpsF	rpsF	rpsF	rpsF	rpsF	rpsF	rpsF	rpsF
Transcription Factors-ribosome	30S ribosomal protein S7	0	rpsG	rpsG	rpsG	rpsG	rpsG	rpsG	rpsG	rpsG	rpsG	rpsG	rpsG	rpsG	rpsG	rpsG
Transcription Factors-ribosome	30S ribosomal protein S8	0	rpsH	rpsH	rpsH	rpsH	rpsH	rpsH	rpsH	rpsH	rpsH	rpsH	rpsH	rpsH	rpsH	rpsH
Transcription Factors-ribosome	30S ribosomal protein S9	0	rpsI	rpsI	rpsI	rpsI	rpsI	rpsI	rpsI	rpsI	rpsI	rpsI	rpsI	rpsI	rpsI	rpsI
Transcription Factors-ribosome	50S ribosomal protein L10	0	rplJ	rplJ	rplJ	rplJ	rplJ	rplJ	rplJ	rplJ	rplJ	rplJ	rplJ	rplJ	rplJ	rplJ
Transcription Factors-ribosome	50S ribosomal protein L11	0	rplK	rplK	rplK	rplK	rplK	rplK	rplK	rplK	rplK	rplK	rplK	rplK	rplK	rplK
Transcription Factors-ribosome	50S ribosomal protein L13	0	rplM	rplM	rplM	rplM	rplM	rplM	rplM	rplM	rplM	rplM	rplM	rplM	rplM	rplM
Transcription Factors-ribosome	50S ribosomal protein L14	0	rplN	rplN	rplN	rplN	rplN	rplN	rplN	rplN	rplN	rplN	rplN	rplN	rplN	rplN
Transcription Factors-ribosome	50S ribosomal protein L15	0	rplO	rplO	rplO	rplO	rplO	rplO	rplO	rplO	rplO	rplO	rplO	rplO	rplO	rplO
Transcription Factors-ribosome	50S ribosomal protein L16	0	rplP	rplP	rplP	rplP	rplP	rplP	rplP	rplP	rplP	rplP	rplP	rplP	rplP	rplP
Transcription Factors-ribosome	50S ribosomal protein L17	0	rplQ	rplQ	rplQ	rplQ	rplQ	rplQ	rplQ	rplQ	rplQ	rplQ	rplQ	rplQ	rplQ	rplQ
Transcription Factors-ribosome	50S ribosomal protein L18	0	rplR	rplR	rplR	rplR	rplR	rplR	rplR	rplR	rplR	rplR	rplR	rplR	rplR	rplR
Transcription Factors-ribosome	50S ribosomal protein L19	0	rplS	rplS	rplS	rplS	rplS	rplS	rplS	rplS	rplS	rplS	rplS	rplS	rplS	rplS
Transcription Factors-ribosome	50S ribosomal protein L2	0	rplB	rplB	rplB	rplB	rplB	rplB	rplB	rplB	rplB	rplB	rplB	rplB	rplB	rplB
Transcription Factors-ribosome	50S ribosomal protein L20	0	rplT	rplT	rplT	rplT	rplT	rplT	rplT	rplT	rplT	rplT	rplT	rplT	rplT	rplT
Transcription Factors-ribosome	50S ribosomal protein L21	0	rplU	rplU	rplU	rplU	rplU	rplU	rplU	rplU	rplU	rplU	rplU	rplU	rplU	rplU
Transcription Factors-ribosome	50S ribosomal protein L22	0	rplV	rplV	rplV	rplV	rplV	rplV	rplV	rplV	rplV	rplV	rplV	rplV	rplV	rplV
Transcription Factors-ribosome	50S ribosomal protein L27	0	rpmA	rpmA	rpmA	rpmA	rpmA	rpmA	rpmA	rpmA	rpmA	rpmA	rpmA	rpmA	rpmA	rpmA
Transcription Factors-ribosome	50S ribosomal protein L28	0	rpmB	rpmB	rpmB	rpmB	rpmB	rpmB	rpmB	rpmB	rpmB	rpmB	rpmB	rpmB	rpmB	rpmB
Transcription Factors-ribosome	50S ribosomal protein L3	0	rplC	rplC	rplC	rplC	rplC	rplC	rplC	rplC	rplC	rplC	rplC	rplC	rplC	rplC
Transcription Factors-ribosome	50S ribosomal protein L30	0	rpmD		rpmD	rpmD		rpmD	rpmD	rpmD	rpmD	rpmD	rpmD		rpmD	rpmD
Transcription Factors-ribosome	50S ribosomal protein L31 type B	0	rpmE	rpmE	rpmE	rpmE	rpmE	rpmE	rpmE	rpmE	rpmE	rpmE	rpmE	rpmE	rpmE	rpmE
Transcription Factors-ribosome	50S ribosomal protein L32	0	rpmF	rpmF	rpmF	rpmF	rpmF	rpmF	rpmF	rpmF	rpmF	rpmF	rpmF	rpmF	rpmF	rpmF
Transcription Factors-ribosome	50S ribosomal protein L33	0	rpmG	rpmG	rpmG	rpmG	rpmG	rpmG	rpmG	rpmG	rpmG	rpmG	rpmG	rpmG	rpmG	rpmG
Transcription Factors-ribosome	50S ribosomal protein L35	0	rpmI	rpmI	rpmI	rpmI	rpmI	rpmI	rpmI	rpmI	rpmI	rpmI	rpmI	rpmI	rpmI	rpmI
Transcription Factors-ribosome	50S ribosomal protein L4	0	rplD	rplD	rplD	rplD	rplD	rplD	rplD	rplD	rplD	rplD	rplD	rplD	rplD	rplD
Transcription Factors-ribosome	50S ribosomal protein L5	0	rplE	rplE	rplE	rplE	rplE	rplE	rplE	rplE	rplE	rplE	rplE	rplE	rplE	rplE
Transcription Factors-ribosome	50S ribosomal protein L6	0	rplF	rplF	rplF	rplF	rplF	rplF	rplF	rplF	rplF	rplF	rplF	rplF	rplF	rplF
Transcription Factors-ribosome	50S ribosomal protein L7/L12	0	rplL	rplL	rplL	rplL	rplL	rplL	rplL	rplL	rplL	rplL	rplL	rplL	rplL	rplL
Transcription Factors-ribosome	50S ribosomal protein L9	0	rplI	rplI	rplI	rplI	rplI	rplI	rplI	rplI	rplI	rplI	rplI	rplI	rplI	rplI
Transcription Factors-ribosome	50S ribosomal subunit protein L1	0	rplA	rplA	rplA	rplA	rplA	rplA	rplA	rplA	rplA	rplA	rplA	rplA
Transcription Factors-ribosome	50S ribosomal subunit protein L36	0	rpmJ	rmpJ	rpmJ	rpmJ	rpmJ	rpmJ	rpmJ	rpmJ	rpmJ	rpmJ	rpmJ	rpmJ	rpmJ	rpmJ
Homoserine	L-homoserine biosynthesis	1	lysC/thrA/metL	thrA	thrA	thrA	thrA	thrA	thrA	thrA	thrA	thrA
Homoserine	L-homoserine biosynthesis	2	asd	asd	asd	asd	asd	asd	asd	asd	asd	asd
Homoserine	L-homoserine biosynthesis	3	thrA/metL	thrA	thrA	thrA	thrA	thrA	thrA	thrA	thrA	thrA
Glycolysis	superpathway of glycolysis, pyruvate dehydrogenase, TCA, and glyoxylate bypass	1	pgi	pgi	pgi	pgi	pgi	pgi	pgi	pgi	pgi	pgi	pgi	pgi	pgi	pgi
Glycolysis	superpathway of glycolysis, pyruvate dehydrogenase, TCA, and glyoxylate bypass	2	pfkB/pfkA	pfkA	pfkA	pfkA	pfkA	pfkA	pfkA	pfkA	pfkA	pfkA	pfkA	pfkA	pfkA	pfkA
Glycolysis	superpathway of glycolysis, pyruvate dehydrogenase, TCA, and glyoxylate bypass	2 (Reverse)	fbp/glpX/yggF/ybhA
Glycolysis	superpathway of glycolysis, pyruvate dehydrogenase, TCA, and glyoxylate bypass	3	fbaB/fbaA	fbaA	fba	fbaA	fbaA	fbaA	fbaA	fbaA	fbaA	fbaA	fbaA	fbaA	fbaA	fbaA
Glycolysis	superpathway of glycolysis, pyruvate dehydrogenase, TCA, and glyoxylate bypass	3B	tpiA	tpiA	tpiA	tpiA	tpiA	tpiA	tpiA	tpiA	tpiA	tpiA	tpiA	tpiA	tpiA	tpiA
Glycolysis	superpathway of glycolysis, pyruvate dehydrogenase, TCA, and glyoxylate bypass	4	gapA	gapA	gapA	gap	gapA	gapA	gapA	gapA	gapA	gapA	gapA	gapA	gapA	gapA
Glycolysis	superpathway of glycolysis, pyruvate dehydrogenase, TCA, and glyoxylate bypass	5	pgk	pgk	pgk	pgk	pgk	pgk	pgk	pgk	pgk	pgk	pgk	pgk	pgk	pgk
Glycolysis	superpathway of glycolysis, pyruvate dehydrogenase, TCA, and glyoxylate bypass	6	gpmA/gpmM	gpmA	gpmA	gpmA	gpmA	gpmA	gpmA	gpmA	gpmA	gpmA	gpmA	gpmA	gpmA	gpmA
Glycolysis	superpathway of glycolysis, pyruvate dehydrogenase, TCA, and glyoxylate bypass	7	eno	eno	eno	eno	eno	eno	eno	eno	eno	eno	eno	eno	eno	eno
Glycolysis	superpathway of glycolysis, pyruvate dehydrogenase, TCA, and glyoxylate bypass	8	pykA/pykF	pykA	pykA	pykA	pykA	pykA	pykA	pykA	pykA	pykA	pykF	pykF	pykF	pykF
Glycolysis	superpathway of glycolysis, pyruvate dehydrogenase, TCA, and glyoxylate bypass	8 (Reverse)	ppsA
Pyruvate Dehydrogenase	superpathway of glycolysis, pyruvate dehydrogenase, TCA, and glyoxylate bypass	9	lpd/aceE/aceF	lpdA	lpdA	lpdA	lpdA	lpd	lpd	lpd	lpd	lpd	lpd	lpd	lpd	lpd
Pyruvate Dehydrogenase	superpathway of glycolysis, pyruvate dehydrogenase, TCA, and glyoxylate bypass	9	lpd/aceE/aceF	aceE	aceE	aceE	aceE	aceE	aceE	aceE	aceE	aceE	aceE	aceE	aceE	aceE
Pyruvate Dehydrogenase	superpathway of glycolysis, pyruvate dehydrogenase, TCA, and glyoxylate bypass	9	lpd/aceE/aceF	aceF	aceF	sucB	aceF	aceF	aceF	aceF	aceF	aceF	aceF	aceF	aceF	aceF
TCA cycle	superpathway of glycolysis, pyruvate dehydrogenase, TCA, and glyoxylate bypass	1	gltA					gltA	gltA	gltA
TCA cycle	superpathway of glycolysis, pyruvate dehydrogenase, TCA, and glyoxylate bypass	2	acnA/acnB					acnA	acnA	acnA
TCA cycle	superpathway of glycolysis, pyruvate dehydrogenase, TCA, and glyoxylate bypass	3	acnA/acnB					acnA	acnA	acnA
TCA cycle	superpathway of glycolysis, pyruvate dehydrogenase, TCA, and glyoxylate bypass	4	icd					icd	icd	icd
TCA cycle	superpathway of glycolysis, pyruvate dehydrogenase, TCA, and glyoxylate bypass	5	lpd+sucA+sucB	lpdA	lpdA	lpdA	lpdA	lpd	lpd	lpd	lpd	lpd	lpd	lpd	lpd	lpd
TCA cycle	superpathway of glycolysis, pyruvate dehydrogenase, TCA, and glyoxylate bypass	5	lpd+sucA+sucB	sucA	sucA	sucA	sucA	sucA	sucA	sucA	sucA	sucA
TCA cycle	superpathway of glycolysis, pyruvate dehydrogenase, TCA, and glyoxylate bypass	5	lpd+sucA+sucB	sucB	sucB	sucB	sucB	sucB	sucB	sucB	sucB	sucB
TCA cycle	superpathway of glycolysis, pyruvate dehydrogenase, TCA, and glyoxylate bypass	6	sucD/sucC	sucD	sucD	sucD	sucD	sucD	sucD	sucD	sucD	sucD
TCA cycle	superpathway of glycolysis, pyruvate dehydrogenase, TCA, and glyoxylate bypass	6	sucD/sucC	sucC	sucC	sucC	sucC	sucC	sucC	sucC	sucC	sucC
TCA cycle	superpathway of glycolysis, pyruvate dehydrogenase, TCA, and glyoxylate bypass	7	sdhB+sdhA+sdhC	sdhB	sdhB	sdhB	sdhB	sdhB	sdhB	sdhB	sdhB	sdhB
TCA cycle	superpathway of glycolysis, pyruvate dehydrogenase, TCA, and glyoxylate bypass	7	sdhB+sdhA+sdhC	sdhA	sdhA	sdhA	sdhA	sdhA	sdhA	sdhA	sdhA	sdhA
TCA cycle	superpathway of glycolysis, pyruvate dehydrogenase, TCA, and glyoxylate bypass	7	sdhB+sdhA+sdhC	sdhC	sdhC	sdhC	sdhC	sdhC	sdhC	sdhC	sdhC	sdhC
TCA cycle	superpathway of glycolysis, pyruvate dehydrogenase, TCA, and glyoxylate bypass	8	fumC/fumD/fumE/fumA/fumB	fumC	fumC	fumC	fumC	fumC	fumC	fumC
TCA cycle	superpathway of glycolysis, pyruvate dehydrogenase, TCA, and glyoxylate bypass	8	fumC/fumD/fumE/fumA/fumB								fumB	fumB
TCA cycle	superpathway of glycolysis, pyruvate dehydrogenase, TCA, and glyoxylate bypass	9	mdh/mqo	mqo	mqo	mqo	mqo	mqo	mqo	mqo	mqo	mqo
TCA cycle	superpathway of glycolysis, pyruvate dehydrogenase, TCA, and glyoxylate bypass	4~6	aceA
Pentose Phosphate Pathway	Pentose Phosphate Pathway	1	zwf	zwf	zwf	zwf	zwf	zwf	zwf	zwf	zwf	zwf	zwf	zwf	zwf	zwf
Pentose Phosphate Pathway	Pentose Phosphate Pathway	2	pgl	ybhE	ybhE	pgl	pgl	pgl	pgl	pgl	pgl	pgl	pgl	pgl	pgl	pgl
Pentose Phosphate Pathway	Pentose Phosphate Pathway	3	gnd	gnd	gnd	gnd	gnd	gnd	gnd	gnd	gnd	gnd	gnd	gnd	gnd	gnd
Pentose Phosphate Pathway	Pentose Phosphate Pathway	4	rpiB+rpe/rpiA+rpe	rpe	rpe	rpe	rpe	rpe	rpe	rpe	rpe	rpe	rpe	rpe	rpe	rpe
Pentose Phosphate Pathway	Pentose Phosphate Pathway	4	rpiB+rpe/rpiA+rpe	rpiA	rpiA	rpiA	rpiA	rpiA	rpiA	rpiA	rpiA	rpiA	rpiA	rpiA	rpiA	rpiA
Pentose Phosphate Pathway	Pentose Phosphate Pathway	4	rpiB+rpe/rpiA+rpe	rpe	rpe	rpe	rpe	rpe	rpe	rpe	rpe	rpe	rpe	rpe	rpe	rpe
Pentose Phosphate Pathway	Pentose Phosphate Pathway	5	tktA/tktB	tktA	tktA	tktA	tktA	tktA	tktA	tktA	tktA	tktA	tktA	tktA	tktA	tktA
Pentose Phosphate Pathway	Pentose Phosphate Pathway	6	tal/talA/talB	talA	talA	tal	tal	talA	talA	talA	talA	talA	talB	talB	talB	talB
Pentose Phosphate Pathway	Pentose Phosphate Pathway	7	tktA/tktB	tktA	tktA	tktA	tktA	tktA	tktA	tktA	tktA	tktA	tktA	tktA	tktA	tktA

## Sheet: S3 - SAMPLE OVERVIEW
Symbiont	Symbiont Present	Diagnostic PCR Tested	Illumina 16S Tested	ITS Tested	Illumina Sequenced	Species	Label	Caste	Colony_ID	Individual_ID	Country	Within Country Location	Date	Collector	Run_ID	Reads_Generated2	Total OTUs	Extraction_Method
Westeberhardia	NO				YES	Cardiocondyla argryrotricha	CARG-1-2	Queen			Malaysia		06/2006	Sabine Frohschammer				Phenol		Column Explanations
Westeberhardia	NO	YES				Cardiocondyla argyrotricha*	2.1_a_17	Queen	2	a_17	Malaysia		06/2006	Sabine Frohschammer				Phenol		Symbiont	The name of the symbiont whose presence/absence is being evaluated
Westeberhardia	NO	YES				Cardiocondyla argyrotricha*	2.1_a_18	Queen	2	a_18	Malaysia		06/2006	Sabine Frohschammer				Qiagen		Symbiont Present	Whether the symbiont of interest was found to be present in the sample (results agree across all tests)
Westeberhardia	NO	YES	YES			Cardiocondyla argyrotricha*	2.1_b_17	Queen	2	b_17	Malaysia		06/2006	Sabine Frohschammer	1_16S	75274	27107	Phenol		Diagnostic PCR Tested	Whether the presence of the symbiont was tested using Diagnostic PCR: YES* indicates sanger sequencing confirmation of results
Westeberhardia	NO	YES				Cardiocondyla argyrotricha*	2.1_b_18	Queen	2	b_18	Malaysia		06/2006	Sabine Frohschammer				Qiagen		Illumina 16S Tested	Whether the presence of the symbiont was tested using Illumina 16S sequencing data
Westeberhardia	NO	YES				Cardiocondyla argyrotricha*	2.2_a_18	Queen	2	a_18	Malaysia		06/2006	Sabine Frohschammer				Qiagen		ITS_Tested	ITS indicates this sample underwent ITS sequencing
Westeberhardia	NO	YES				Cardiocondyla argyrotricha*	2.2_b_18	Queen	2	b_18	Malaysia		06/2006	Sabine Frohschammer				Qiagen		Species	What species did the sample belong to, * indicates provisional name of a recognized morphospecies to be described by B. Seifert
Westeberhardia	NO	YES	YES	YES		Cardiocondyla argyrotricha*	CARGYROMAL123 Q1	Queen	CARGYROMAL123	Q1	Malaysia	Tioman	06/2006	Sabine Frohschammer	2_16S	601202	115816	Qiagen		Label	Sample ID Code
Westeberhardia	NO		YES			Cardiocondyla argyrotricha*	CARGYROMAL123 Q2	Queen	CARGYROMAL123	Q2	Malaysia	Tioman	06/2006	Sabine Frohschammer	2_16S	543886	110813	Qiagen		Caste	Indicates the caste of the sample
Westeberhardia	NO	YES	YES	YES		Cardiocondyla argyrotricha*	CARGYROMAL18 Q1	Queen	CARGYROMAL18	Q1	Malaysia	Baku	06/2006	Sabine Frohschammer	2_16S	581212	110211	Qiagen		Colony ID	Colony ID for the sample
Westeberhardia	NO	YES				Cardiocondyla argyrotricha*	CARGYROMAL18 Q2	Queen	CARGYROMAL18	Q2	Malaysia	Baku	06/2006	Sabine Frohschammer				Qiagen		Individual ID	Individual sample ID number
Westeberhardia	NO		YES			Cardiocondyla argyrotricha*	CARGYROMAL18 Q3	Queen	CARGYROMAL18	Q3	Malaysia	Baku	06/2006	Sabine Frohschammer	2_16S	573704	96103	Qiagen		Country	Country in which the sample was collected
Westeberhardia	NO		YES			Cardiocondyla argyrotricha*	CARGYROMAL18 Q4	Queen	CARGYROMAL18	Q4	Malaysia	Baku	06/2006	Sabine Frohschammer	2_16S	641212	91946	Qiagen		Collector	Name of sample collector
Westeberhardia	NO	YES				Cardiocondyla elegans	3.1_a_17	Queen	3	a_17	France	Loire		Jürgen Heinze				Phenol		Run_ID	Which 16S run the sample was sequenced in: 1_16S indicates the first run, 2_16S indicates the second run
Westeberhardia	NO	YES				Cardiocondyla elegans	3.1_a_18	Queen	3	a_18	France	Loire		Jürgen Heinze				Qiagen		Reads_Generated	Total Reads Generated from Amplicon Sequencing (Both Forward and Reverse)
Westeberhardia	NO	YES				Cardiocondyla elegans	3.1-b_17	Queen	3	b_17	France	Loire		Jürgen Heinze				Phenol		Total OTUs	Count of Total OTUs in each sample
Westeberhardia	NO	YES	YES			Cardiocondyla elegans	3.2_a_17	Queen	3	a_17	France	Loire		Jürgen Heinze	1_16S	24498	8727	Qiagen		Extraction	Indicates the extraction method used for the sample
Westeberhardia	NO				YES	Cardiocondyla elegans	CEL-1-3	Queen			France	Loire		Jürgen Heinze				Phenol
Westeberhardia	YES	YES	YES			Cardiocondyla emeryi	CEMERYIMAL54 Q1	Queen	CEMERYIMAL54	Q1	Malaysia	Lundu	06/2006	Sabine Frohschammer	2_16S	356101	101428	Qiagen
Westeberhardia	YES	YES	YES			Cardiocondyla emeryi	CEMERYIMAL54 Q2	Queen	CEMERYIMAL54	Q2	Malaysia	Lundu	06/2006	Sabine Frohschammer	2_16S	511625	144128	Qiagen
Westeberhardia	YES	YES*				Cardiocondyla emeryi	CEMERYIMAL54 Q4	Queen	CEMERYIMAL54	Q4	Malaysia	Lundu	06/2006	Sabine Frohschammer				Qiagen
Westeberhardia	YES	YES	YES			Cardiocondyla emeryi	CEMERYIMAL71 Q1	Queen	CEMERYIMAL71	Q1	Malaysia	Tioman	06/2006	Sabine Frohschammer	2_16S	614968	158482	Qiagen
Westeberhardia	YES	YES	YES			Cardiocondyla emeryi	CEMERYIMAL71 Q2	Queen	CEMERYIMAL71	Q2	Malaysia	Tioman	06/2006	Sabine Frohschammer	2_16S	479466	135007	Qiagen
Westeberhardia	YES	YES*				Cardiocondyla emeryi	CEMERYIMAL71 Q3	Queen	CEMERYIMAL71	Q3	Malaysia	Tioman	06/2006	Sabine Frohschammer				Qiagen
Westeberhardia	YES	YES	YES			Cardiocondyla itsukii	CITSUKIIHI34 Q1	Queen	CITSUKIIHI34	Q1	Hawaii	Koke'e State Park	29/08/2006	Jürgen Heinze	2_16S	384282	106747	Qiagen
Westeberhardia	YES	YES	YES			Cardiocondyla itsukii	CITSUKIIHI36 Q1	Queen	CITSUKIIHI36	Q1	Hawaii	Koke'e State Park	29/08/2006	Jürgen Heinze	2_16S	441556	125193	Qiagen
Westeberhardia	YES	YES*				Cardiocondyla itsukii	CITSUKIIHI36 Q2	Queen	CITSUKIIHI36	Q2	Hawaii	Koke'e State Park	29/08/2006	Jürgen Heinze				Qiagen
Westeberhardia	YES	YES*				Cardiocondyla itsukii	CITSUKIIHI36 Q3	Queen	CITSUKIIHI36	Q3	Hawaii	Koke'e State Park	29/08/2006	Jürgen Heinze				Qiagen
Westeberhardia	YES	YES*				Cardiocondyla itsukii	CITSUKIIHI36 Q4	Queen	CITSUKIIHI36	Q4	Hawaii	Koke'e State Park	29/08/2006	Jürgen Heinze				Qiagen
Westeberhardia	YES	YES	YES			Cardiocondyla itsukii	CITSUKIIHI37 Q1	Queen	CITSUKIIHI37	Q1	Hawaii	Koke'e State Park	29/08/2006	Jürgen Heinze	2_16S	256261	77186	Qiagen
Westeberhardia	NO	YES	YES	YES		Cardiocondyla itsukii	CITSUKIIHI37 Q2	Queen	CITSUKIIHI37	Q2	Hawaii	Koke'e State Park	29/08/2006	Jürgen Heinze	2_16S	327079	53824	Qiagen
Westeberhardia	YES	YES*				Cardiocondyla itsukii	CITSUKIIHI37 Q3	Queen	CITSUKIIHI37	Q3	Hawaii	Koke'e State Park	29/08/2006	Jürgen Heinze				Qiagen
Westeberhardia	YES	YES*				Cardiocondyla itsukii	CITSUKIIHI37 Q4	Queen	CITSUKIIHI37	Q4	Hawaii	Koke'e State Park	29/08/2006	Jürgen Heinze				Qiagen
Westeberhardia	YES	YES	YES			Cardiocondyla itsukii	CITSUKII1B1 Q1	Queen	CITSUKII1B1	Q1	Japan	Okinawa		Masaki Suefuji	2_16S	504748	137431	Qiagen
Westeberhardia	YES	YES*				Cardiocondyla itsukii	CITSUKII1B1 Q3	Queen	CITSUKII1B1	Q3	Japan	Okinawa		Masaki Suefuji				Qiagen
Westeberhardia	YES	YES	YES			Cardiocondyla itsukii	CITSUKII4A Q1	Queen	CITSUKII4A	Q1	Japan	Okinawa		Masaki Suefuji	2_16S	371542	100382	Qiagen
Westeberhardia	YES	YES*				Cardiocondyla itsukii	CITSUKII4A Q2	Queen	CITSUKII4A	Q2	Japan	Okinawa		Masaki Suefuji				Qiagen
Westeberhardia	YES	YES*				Cardiocondyla itsukii	CITSUKII4A Q3	Queen	CITSUKII4A	Q3	Japan	Okinawa		Masaki Suefuji				Qiagen
Westeberhardia	YES	YES*				Cardiocondyla itsukii	CITSUKII4A Q4	Queen	CITSUKII4A	Q4	Japan	Okinawa		Masaki Suefuji				Qiagen
Westeberhardia	NO	YES	YES	YES		Cardiocondyla koshewnikovi/sahlbergi	CKOSHGEOII28	Queen	CKOSHGEOII28		Georgia	Potshkovi	16/09/2006	Jürgen Heinze	2_16S	588492	163470	Qiagen
Westeberhardia	NO	YES*	YES			Cardiocondyla koshewnikovi/sahlbergi	CKOSHGEOII38	Queen	CKOSHGEOII38		Georgia	Potshkovi	16/09/2006	Jürgen Heinze	2_16S	289666	67924	Qiagen
Westeberhardia	NO	YES*	YES			Cardiocondyla koshewnikovi/sahlbergi	CKOSHGEOII39	Queen	CKOSHGEOII39		Georgia	Potshkovi	16/09/2006	Jürgen Heinze	2_16S	451185	120506	Qiagen
Westeberhardia	NO	YES*	YES			Cardiocondyla latifrons*	CLATIFRONSMAL8 Q1	Queen	CLATIFRONSMAL8	Q1	Malaysia	Santobonog	06/2006	Sabine Frohschammer	2_16S	427555	105400	Qiagen
Westeberhardia	NO		YES			Cardiocondyla latifrons*	CLATIFRONSMAL8 Q2	Queen	CLATIFRONSMAL8	Q2	Malaysia	Santobonog	06/2006	Sabine Frohschammer	2_16S	497006	111302	Qiagen
Westeberhardia	YES				YES	Cardiocondyla mauritanica	CMAUR-2-8	Queen			Spain	Motril	1999	Jürgen Heinze/D. Ortius				QIagen
Westeberhardia	YES	YES	YES			Cardiocondyla mauritanica	CMAURIT#1 Q1	Queen	CMAURIT#1	Q1	Spain	Motril	29/06/2002	Jürgen Heinze/D. Ortius	2_16S	443370	135772	Qiagen
Westeberhardia	YES	YES	YES			Cardiocondyla mauritanica	CMAURIT#1 Q2	Queen	CMAURIT#1	Q2	Spain	Motril	1999	Jürgen Heinze/D. Ortius	2_16S	292537	80135	Qiagen
Westeberhardia	NO	YES	YES	YES		Cardiocondyla mauritanica	CMAURITCN14 Q1	Queen	CMAURITCN14	Q1	Spain	Motril	1999	Jürgen Heinze/D. Ortius	2_16S	360637	93103	Qiagen
Westeberhardia	YES	YES	YES			Cardiocondyla mauritanica	CMAURITCN4 Q1	Queen	CMAURITCN4	Q1	Spain	Motril	1999	Jürgen Heinze/D. Ortius	2_16S	486911	142663	Qiagen
Westeberhardia	YES	YES	YES			Cardiocondyla mauritanica	CMAURITCN4 Q2	Queen	CMAURITCN4	Q2	Spain	Motril	1999	Jürgen Heinze/D. Ortius	2_16S	328826	81357	Qiagen
Westeberhardia	YES	YES*				Cardiocondyla mauritanica	CMAURITCN4 Q3	Queen	CMAURITCN4	Q3	Spain	Motril	1999	Jürgen Heinze/D. Ortius				Qiagen
Westeberhardia	YES	YES*				Cardiocondyla mauritanica	CMAURITCN4 Q4	Queen	CMAURITCN4	Q4	Spain	Motril	1999	Jürgen Heinze/D. Ortius				Qiagen
Westeberhardia	YES	YES	YES	YES		Cardiocondyla mauritanica	CMAURITCN9 Q1	Queen	CMAURITCN9	Q1	Spain	Motril	1999	Jürgen Heinze/D. Ortius	2_16S	418147	108951	Qiagen
Westeberhardia	YES	YES	YES			Cardiocondyla mauritanica	CMAURITCN9 Q2	Queen	CMAURITCN9	Q2	Spain	Motril	1999	Jürgen Heinze/D. Ortius	2_16S	279982	86216	Qiagen
Westeberhardia	NO	YES*				Cardiocondyla mauritanica	CMAURITCN9 Q3	Queen	CMAURITCN9	Q3	Spain	Motril	1999	Jürgen Heinze/D. Ortius				Qiagen
Westeberhardia	YES	YES*				Cardiocondyla mauritanica	CMAURITCN9 Q4	Queen	CMAURITCN9	Q4	Spain	Motril	1999	Jürgen Heinze/D. Ortius				Qiagen
Westeberhardia	NO	YES	YES	YES		Cardiocondyla microseta*	CMICROSECTAMAL56 Q1	Queen	CMICROSECTAMAL56	Q1	Malaysia	Lundu Gunung	06/2006	Sabine Frohschammer	2_16S	489762	57396	Qiagen
Westeberhardia	NO	YES	YES			Cardiocondyla microseta*	CMICROSECTAMAL56 Q2	Queen	CMICROSECTAMAL56	Q2	Malaysia	Lundu Gunung	06/2006	Sabine Frohschammer	2_16S	364348	85180	Qiagen
Westeberhardia	NO	YES				Cardiocondyla microseta*	CMICROSECTAMAL56 Q3	Queen	CMICROSECTAMAL56	Q3	Malaysia	Lundu Gunung	06/2006	Sabine Frohschammer				Qiagen
Westeberhardia	NO	YES*				Cardiocondyla microseta*	CMICROSECTAMAL56 Q4	Queen	CMICROSECTAMAL56	Q4	Malaysia	Lundu Gunung	06/2006	Sabine Frohschammer				Qiagen
Westeberhardia	YES	YES*				Cardiocondyla minutior	9.3	Queen			Jamaica			Jan Oettler				Qiagen
Westeberhardia	YES	YES*	YES	YES		Cardiocondyla minutior	10.1	Queen	10	1	Jamaica			Jan Oettler	2_16S	348872	102040	Qiagen
Westeberhardia	YES	YES	YES			Cardiocondyla minutior	10.2	Queen	10	2	Jamaica			Jan Oettler	2_16S	431332	93768	Qiagen
Westeberhardia	YES				YES	Cardiocondyla minutior	CMINU-2-7	Queen			Japan	Okinawa	22/04/2002	K. Yamauchi				QIagen
Westeberhardia	YES	YES*	YES			Cardiocondyla minutior	CMINUTORISHIGAKI Q1	Queen	CMINUTORISHIGAKI	Q1	Japan	Ishigaki	23/11/2000	K. Yamauchi	2_16S	369569	91362	Qiagen
Westeberhardia	NO	YES	YES			Cardiocondyla minutior	CMINUTORISHIGAKI Q2	Queen	CMINUTORISHIGAKI	Q2	Japan	Ishigaki	23/11/2000	K. Yamauchi	2_16S	446270	99591	Qiagen
Westeberhardia	YES	YES	YES			Cardiocondyla minutior	CMINUTOROKINAWA Q1	Queen	CMINUTOROKINAWA	Q1	Japan	Okinawa	22/04/2002	K. Yamauchi	2_16S	480710	109763	Qiagen
Westeberhardia	NO	YES	YES			Cardiocondyla minutior	CMINUTOROKINAWA Q2	Queen	CMINUTOROKINAWA	Q2	Japan	Okinawa	22/04/2002	K. Yamauchi	2_16S	527124	120927	Qiagen
Westeberhardia	YES	YES*				Cardiocondyla nuda OR atalanta	8.1_a_17	Queen	8	a_17	Australia	Cairns,Queensland		Jan Oettler/Jürgen Heinze				Phenol
Westeberhardia	YES	YES*				Cardiocondyla nuda OR atalanta	8.1_a_18	Queen	8	a_18	Australia	Cairns,Queensland		Jan Oettler/Jürgen Heinze				Qiagen
Westeberhardia	YES	YES	YES			Cardiocondyla nuda OR atalanta	8.1_c_17	Queen	8	c_17	Australia	Cairns,Queensland		Jan Oettler/Jürgen Heinze	1_16S	114334	49304	Phenol
Westeberhardia	YES	YES*				Cardiocondyla nuda OR atalanta	8.2_a_18	Queen	8	a_18	Australia	Cairns,Queensland		Jan Oettler/Jürgen Heinze				Qiagen
Westeberhardia	NO				YES	Cardiocondyla nuda OR atalanta	CNU-1-8	Queen			Australia	Cairns,Queensland		Jan Oettler/Jürgen Heinze				Phenol
Westeberhardia	YES	YES*				Cardiocondyla obscurior	5.1_a_17	Queen	5	a_17	Japan	Naha, Okinawa		Masaki Suefuji				Phenol
Westeberhardia	YES	YES*				Cardiocondyla obscurior	5.1_a_18	Queen	5	a_18	Japan	Naha, Okinawa		Masaki Suefuji				Qiagen
Westeberhardia	YES	YES*				Cardiocondyla obscurior	5.1_b_17	Queen	5	b_17	Japan	Naha, Okinawa		Masaki Suefuji				Phenol
Westeberhardia	YES	YES*				Cardiocondyla obscurior	5.1_c_17	Queen	5	c_17	Japan	Naha, Okinawa		Masaki Suefuji				Phenol
Westeberhardia	YES	YES*				Cardiocondyla obscurior	5.2_a_18	Queen	5	a_18	Japan	Naha, Okinawa		Masaki Suefuji				Qiagen
Westeberhardia	YES	YES*				Cardiocondyla obscurior	5.2_b_18	Queen	5	b_18	Japan	Naha, Okinawa		Masaki Suefuji				Qiagen
Westeberhardia	YES				YES	Cardiocondyla obscurior	COBS-1-5	Queen			Japan	Naha, Okinawa		Masaki Suefuji				Phenol
Westeberhardia	YES	YES*				Cardiocondyla obscurior	1.1_a_17	Queen	1	a_17	Tenerife			Sylvia Cremer/Tina Wanke				Phenol
Westeberhardia	YES	YES	YES			Cardiocondyla obscurior	1.1_b_17	Queen	1	b_17	Tenerife			Sylvia Cremer/Tina Wanke	1_16S	107067	42472	Phenol
Westeberhardia	YES	YES*				Cardiocondyla obscurior	1.2_a_18	Queen	1	a_18	Tenerife			Sylvia Cremer/Tina Wanke				Qiagen
Westeberhardia	NO				YES	Cardiocondyla obscurior	COBS-1-1	Queen			Tenerife			Sylvia Cremer/Tina Wanke				Phenol
Westeberhardia	YES	YES*				Cardiocondyla obscurior	6.1_a_18	Queen	6	a_18	Taiwan							Qiagen
Westeberhardia	YES	YES*				Cardiocondyla obscurior	6.1_b_17	Queen	6	b_17	Taiwan							Phenol
Westeberhardia	YES	YES*				Cardiocondyla obscurior	6.1_c_17	Queen	6	c_17	Taiwan							Phenol
Westeberhardia	YES	YES*				Cardiocondyla obscurior	6.1_d_17	Queen	6	d_17	Taiwan							Phenol
Westeberhardia	YES	YES*				Cardiocondyla obscurior	6.2_a_18	Queen	6	a_18	Taiwan							Qiagen
Westeberhardia	YES	YES*				Cardiocondyla obscurior	6.2_b_18	Queen	6	b_18	Taiwan							Qiagen
Westeberhardia	YES	YES	YES			Cardiocondyla schuckardi	CSHUCKARDIM85 Q1	Queen	CSHUCKARDIM85	Q1	Madagascar	Tsimbazaza	13/03/2021	Jürgen Heinze	2_16S	392058	110181	Qiagen
Westeberhardia	YES	YES*				Cardiocondyla schuckardi	CSHUCKARDIM85 Q2	Queen	CSHUCKARDIM85	Q2	Madagascar	Tsimbazaza	13/03/2021	Jürgen Heinze				Qiagen
Westeberhardia	YES	YES	YES			Cardiocondyla schuckardi	CSHUCKARDIM87 Q1	Queen	CSHUCKARDIM87	Q1	Madagascar	Tsimbazaza	13/03/2021	Jürgen Heinze	2_16S	514080	129331	Qiagen
Westeberhardia	NO				YES	Cardiocondyla thoracia	CTHOR-1-9	Queen			Australia	Iron Range NP, Queensland		Jan Oettler/Jürgen Heinze				Phenol
Westeberhardia	NO	YES				Cardiocondyla thoracica	9.1_a_17	Queen	9	a_17	Australia	Iron Range NP, Queensland		Jan Oettler/Jürgen Heinze				Phenol
Westeberhardia	NO	YES				Cardiocondyla thoracica	9.1_a_18	Queen	9	a_18	Australia	Iron Range NP, Queensland		Jan Oettler/Jürgen Heinze				Qiagen
Westeberhardia	NO	YES	YES			Cardiocondyla thoracica	9.1_b_17	Queen	9	b_17	Australia	Iron Range NP, Queensland		Jan Oettler/Jürgen Heinze	1_16S	65576	29836	Phenol
Westeberhardia	NO	YES				Cardiocondyla thoracica	9.2_a_18	Queen	9	a_18	Australia	Iron Range NP, Queensland		Jan Oettler/Jürgen Heinze				Qiagen
Westeberhardia	NO	YES				Cardiocondyla thoracica	9.2_b_18	Queen	9	b_18	Australia	Iron Range NP, Queensland		Jan Oettler/Jürgen Heinze				Qiagen
Westeberhardia	NO				YES	Cardiocondyla venestula	CVEN-1-4	Queen			RSA	Hlalanathi, Drakensberg		Jan Oettler/Jürgen Heinze				Phenol
Westeberhardia	YES	YES	YES	YES		Cardiocondyla venustula	4.1_b_17	Queen	4	b_17	RSA	Hlalanathi, Drakensberg		Jan Oettler/Jürgen Heinze	1_16S	195101	96157	Phenol
Westeberhardia	YES	YES*				Cardiocondyla venustula	4.1_b_18	Queen	4	b_18	RSA	Hlalanathi, Drakensberg		Jan Oettler/Jürgen Heinze				Qiagen
Westeberhardia	NO	YES	YES			Cardiocondyla venustula	4.2_a_17	Queen	4	a_17	RSA	Hlalanathi, Drakensberg		Jan Oettler/Jürgen Heinze	1_16S	421154	130919	Qiagen
Westeberhardia	YES	YES*				Cardiocondyla wroughtonii	7.1_a_17	Queen	7	a_17	Japan	Nakijin, Okinawa	2013	Masaki Suefuji				Phenol
Westeberhardia	NO	YES				Cardiocondyla wroughtonii	7.1_a_18	Queen	7	a_18	Japan	Nakijin, Okinawa	2013	Masaki Suefuji				Qiagen
Westeberhardia	YES	YES*				Cardiocondyla wroughtonii	7.1_b_17	Queen	7	b_17	Japan	Nakijin, Okinawa	2013	Masaki Suefuji				Phenol
Westeberhardia	NO	YES	YES			Cardiocondyla wroughtonii	7.1_c_17	Queen	7	c_17	Japan	Nakijin, Okinawa	2013	Masaki Suefuji	1_16S	38642	21188	Phenol
Westeberhardia	YES				YES	Cardiocondyla wroughtonii	CWRO-1-7	Queen			Japan	Nakijin, Okinawa	2013	Masaki Suefuji				Phenol
Sodalis-like (Hugann)	NO		YES	YES		Formica aquilonia	FA 1 Q	Queen	1		Finland	Prästkulla, Raasepori	May 2017	Heikki Helanterä	2_16S	299336	73138	QIagen
Sodalis-like (Hugann)	NO		YES			Formica aquilonia	FA 2 Q	Queen	2		Finland	Prästkulla, Raasepori	May 2017	Heikki Helanterä	2_16S	280484	74597	QIagen
Sodalis-like (Hugann)	NO		YES			Formica aquilonia	FA 3 Q	Queen	3		Finland	Prästkulla, Raasepori	May 2017	Heikki Helanterä	2_16S	389898	110440	QIagen
Sodalis-like (Hugann)	NO		YES			Formica aquilonia	FA 4 Q	Queen	4		Finland	Prästkulla, Raasepori	May 2017	Heikki Helanterä	2_16S	334777	90885	QIagen
Sodalis-like (Hugann)	NO		YES			Formica aquilonia	FA 5 Q	Queen	5		Finland	Prästkulla, Raasepori	May 2017	Heikki Helanterä	2_16S	266939	71140	QIagen
Sodalis-like (Hugann)	NO		YES	YES		Formica aquilonia	FA 6 Q	Queen	6		Finland	Prästkulla, Raasepori	May 2017	Heikki Helanterä	2_16S	381376	98674	QIagen
Sodalis-like (Hugann)	NO		YES			Formica aquilonia	FA1Q	Queen	1		Finland	Prästkulla, Raasepori	May 2017	Heikki Helanterä	1_16S	51865	22300	Phenol
Sodalis-like (Hugann)	NO		YES			Formica aquilonia	FA2Q	Queen	2		Finland	Prästkulla, Raasepori	May 2017	Heikki Helanterä	1_16S	248417	144686	Phenol
Sodalis-like (Hugann)	NO		YES			Formica aquilonia	FA3Q	Queen	3		Finland	Prästkulla, Raasepori	May 2017	Heikki Helanterä	1_16S	159592	84901	Phenol
Sodalis-like (Hugann)	NO		YES			Formica aquilonia	FA4Q	Queen	4		Finland	Prästkulla, Raasepori	May 2017	Heikki Helanterä	1_16S	99603	32700	Phenol
Sodalis-like (Hugann)	NO		YES			Formica aquilonia	FA5Q	Queen	5		Finland	Prästkulla, Raasepori	May 2017	Heikki Helanterä	1_16S	248904	116913	Phenol
Sodalis-like (Hugann)	NO		YES			Formica aquilonia	FA6Q	Queen	6		Finland	Prästkulla, Raasepori	May 2017	Heikki Helanterä	1_16S	489727	229182	Phenol
Sodalis-like (Hugann)	YES		YES			Formica cinerea	FC 1	Queen	1		Finland	Hanko	May 2018	Heikki Helanterä	2_16S	298850	73656	QIagen
Sodalis-like (Hugann)	NO	YES				Formica cinerea	FC 1 Q1	Queen	1	Q1	Finland	Hanko	May 2018	Heikki Helanterä				QIagen
Sodalis-like (Hugann)	YES	YES				Formica cinerea	FC 1 Q2	Queen	1	Q2	Finland	Hanko	May 2018	Heikki Helanterä				QIagen
Sodalis-like (Hugann)	YES	YES				Formica cinerea	FC 1 Q3	Queen	1	Q3	Finland	Hanko	May 2018	Heikki Helanterä				QIagen
Sodalis-like (Hugann)	YES	YES				Formica cinerea	FC 1 Q4	Queen	1	Q4	Finland	Hanko	May 2018	Heikki Helanterä				QIagen
Sodalis-like (Hugann)	YES	YES				Formica cinerea	FC 1 Q5	Queen	1	Q5	Finland	Hanko	May 2018	Heikki Helanterä				QIagen
Sodalis-like (Hugann)	YES	YES				Formica cinerea	FC 1 Q6	Queen	1	Q6	Finland	Hanko	May 2018	Heikki Helanterä				QIagen
Sodalis-like (Hugann)	NO	YES				Formica cinerea	FC 1 Q7	Queen	1	Q7	Finland	Hanko	May 2018	Heikki Helanterä				QIagen
Sodalis-like (Hugann)	YES	YES				Formica cinerea	FC 1 Q8	Queen	1	Q8	Finland	Hanko	May 2018	Heikki Helanterä				QIagen
Sodalis-like (Hugann)	NO	YES				Formica cinerea	FC 1 W1	Worker	1	W1	Finland	Hanko	May 2018	Heikki Helanterä				QIagen
Sodalis-like (Hugann)	YES	YES				Formica cinerea	FC 1 W10	Worker	1	W10	Finland	Hanko	May 2018	Heikki Helanterä				QIagen
Sodalis-like (Hugann)	YES	YES				Formica cinerea	FC 1 W2	Worker	1	W2	Finland	Hanko	May 2018	Heikki Helanterä				QIagen
Sodalis-like (Hugann)	YES	YES				Formica cinerea	FC 1 W3	Worker	1	W3	Finland	Hanko	May 2018	Heikki Helanterä				QIagen
Sodalis-like (Hugann)	NO	YES				Formica cinerea	FC 1 W4	Worker	1	W4	Finland	Hanko	May 2018	Heikki Helanterä				QIagen
Sodalis-like (Hugann)	YES	YES				Formica cinerea	FC 1 W5	Worker	1	W5	Finland	Hanko	May 2018	Heikki Helanterä				QIagen
Sodalis-like (Hugann)	NO	YES				Formica cinerea	FC 1 W6	Worker	1	W6	Finland	Hanko	May 2018	Heikki Helanterä				QIagen
Sodalis-like (Hugann)	YES	YES				Formica cinerea	FC 1 W7	Worker	1	W7	Finland	Hanko	May 2018	Heikki Helanterä				QIagen
Sodalis-like (Hugann)	NO	YES				Formica cinerea	FC 1 W9	Worker	1	W9	Finland	Hanko	May 2018	Heikki Helanterä				QIagen
Sodalis-like (Hugann)	NO		YES			Formica cinerea	FC 2	Queen	2		Finland	Hanko	May 2018	Heikki Helanterä	2_16S	281929	68968	QIagen
Sodalis-like (Hugann)	NO	YES				Formica cinerea	FC 2 W1	Worker	2	W1	Finland	Hanko	May 2018	Heikki Helanterä				QIagen
Sodalis-like (Hugann)	YES	YES				Formica cinerea	FC 2 W10	Worker	2	W10	Finland	Hanko	May 2018	Heikki Helanterä				QIagen
Sodalis-like (Hugann)	YES	YES				Formica cinerea	FC 2 W2	Worker	2	W2	Finland	Hanko	May 2018	Heikki Helanterä				QIagen
Sodalis-like (Hugann)	NO	YES				Formica cinerea	FC 2 W3	Worker	2	W3	Finland	Hanko	May 2018	Heikki Helanterä				QIagen
Sodalis-like (Hugann)	NO	YES				Formica cinerea	FC 2 W4	Worker	2	W4	Finland	Hanko	May 2018	Heikki Helanterä				QIagen
Sodalis-like (Hugann)	YES	YES				Formica cinerea	FC 2 W5	Worker	2	W5	Finland	Hanko	May 2018	Heikki Helanterä				QIagen
Sodalis-like (Hugann)	NO	YES				Formica cinerea	FC 2 W6	Worker	2	W6	Finland	Hanko	May 2018	Heikki Helanterä				QIagen
Sodalis-like (Hugann)	YES	YES				Formica cinerea	FC 2 W7	Worker	2	W7	Finland	Hanko	May 2018	Heikki Helanterä				QIagen
Sodalis-like (Hugann)	YES	YES				Formica cinerea	FC 2 W8	Worker	2	W8	Finland	Hanko	May 2018	Heikki Helanterä				QIagen
Sodalis-like (Hugann)	YES	YES				Formica cinerea	FC 2 W9	Worker	2	W9	Finland	Hanko	May 2018	Heikki Helanterä				QIagen
Sodalis-like (Hugann)	YES		YES			Formica cinerea	FC 3	Queen	3		Finland	Hanko	May 2018	Heikki Helanterä	2_16S	346797	91409	QIagen
Sodalis-like (Hugann)	YES	YES				Formica cinerea	FC 3 W1	Worker	3	W1	Finland	Hanko	May 2018	Heikki Helanterä				QIagen
Sodalis-like (Hugann)	YES	YES				Formica cinerea	FC 3 W10	Worker	3	W10	Finland	Hanko	May 2018	Heikki Helanterä				QIagen
Sodalis-like (Hugann)	YES	YES				Formica cinerea	FC 3 W2	Worker	3	W2	Finland	Hanko	May 2018	Heikki Helanterä				QIagen
Sodalis-like (Hugann)	YES	YES				Formica cinerea	FC 3 W3	Worker	3	W3	Finland	Hanko	May 2018	Heikki Helanterä				QIagen
Sodalis-like (Hugann)	YES	YES				Formica cinerea	FC 3 W4	Worker	3	W4	Finland	Hanko	May 2018	Heikki Helanterä				QIagen
Sodalis-like (Hugann)	YES	YES				Formica cinerea	FC 3 W5	Worker	3	W5	Finland	Hanko	May 2018	Heikki Helanterä				QIagen
Sodalis-like (Hugann)	YES	YES				Formica cinerea	FC 3 W6	Worker	3	W6	Finland	Hanko	May 2018	Heikki Helanterä				QIagen
Sodalis-like (Hugann)	YES	YES				Formica cinerea	FC 3 W7	Worker	3	W7	Finland	Hanko	May 2018	Heikki Helanterä				QIagen
Sodalis-like (Hugann)	YES	YES				Formica cinerea	FC 3 W8	Worker	3	W8	Finland	Hanko	May 2018	Heikki Helanterä				QIagen
Sodalis-like (Hugann)	NO	YES				Formica cinerea	FC 3 W9	Worker	3	W9	Finland	Hanko	May 2018	Heikki Helanterä				QIagen
Sodalis-like (Hugann)	NO		YES			Formica cinerea	FC X	Queen	X		Finland	Hanko	May 2018	Heikki Helanterä	2_16S	253751	56115	QIagen
Sodalis-like (Hugann)	YES	YES				Formica cinerea	FC X W1	Worker	X	W1	Finland	Hanko	May 2018	Heikki Helanterä				QIagen
Sodalis-like (Hugann)	YES	YES				Formica cinerea	FC X W10	Worker	X	W10	Finland	Hanko	May 2018	Heikki Helanterä				QIagen
Sodalis-like (Hugann)	YES	YES				Formica cinerea	FC X W2	Worker	X	W2	Finland	Hanko	May 2018	Heikki Helanterä				QIagen
Sodalis-like (Hugann)	YES	YES				Formica cinerea	FC X W3	Worker	X	W3	Finland	Hanko	May 2018	Heikki Helanterä				QIagen
Sodalis-like (Hugann)	NO	YES				Formica cinerea	FC X W4	Worker	X	W4	Finland	Hanko	May 2018	Heikki Helanterä				QIagen
Sodalis-like (Hugann)	NO	YES				Formica cinerea	FC X W5	Worker	X	W5	Finland	Hanko	May 2018	Heikki Helanterä				QIagen
Sodalis-like (Hugann)	NO	YES				Formica cinerea	FC X W6	Worker	X	W6	Finland	Hanko	May 2018	Heikki Helanterä				QIagen
Sodalis-like (Hugann)	YES	YES				Formica cinerea	FC X W7	Worker	X	W7	Finland	Hanko	May 2018	Heikki Helanterä				QIagen
Sodalis-like (Hugann)	NO	YES				Formica cinerea	FC X W8	Worker	X	W8	Finland	Hanko	May 2018	Heikki Helanterä				QIagen
Sodalis-like (Hugann)	YES	YES				Formica cinerea	FC X W9	Worker	X	W9	Finland	Hanko	May 2018	Heikki Helanterä				QIagen
Sodalis-like (Hugann)	NO				YES	Formica cinerea	FCIN-2-5	Queen			Finland	Hanko	May 2018	Heikki Helanterä				QIagen
Sodalis-like (Hugann)	YES	YES*				Formica cinerea	Murtoperä cinerea F1 Q1	Queen	YMFC1	Q1	Finland	Murtoperä, Oulu	July 2020	Heikki Helanterä				QIagen
Sodalis-like (Hugann)	YES	YES*				Formica cinerea	Murtoperä cinerea F1 Q2	Queen	YMFC1	Q2	Finland	Murtoperä, Oulu	July 2020	Heikki Helanterä				QIagen
Sodalis-like (Hugann)	YES	YES*				Formica cinerea	Murtoperä cinerea F1 Q3	Queen	YMFC1	Q3	Finland	Murtoperä, Oulu	July 2020	Heikki Helanterä				QIagen
Sodalis-like (Hugann)	YES	YES*				Formica cinerea	Murtoperä cinerea F1 Q4	Queen	YMFC1	Q4	Finland	Murtoperä, Oulu	July 2020	Heikki Helanterä				QIagen
Sodalis-like (Hugann)	YES	YES*				Formica cinerea	Murtoperä cinerea F1 Q5	Queen	YMFC1	Q5	Finland	Murtoperä, Oulu	July 2020	Heikki Helanterä				QIagen
Sodalis-like (Hugann)	YES	YES*				Formica cinerea	Nenännokka cinerea F1 Q1	Queen	YNFC1	Q1	Finland	Nenännokka, Oulu	July 2020	Heikki Helanterä				QIagen
Sodalis-like (Hugann)	YES	YES*				Formica cinerea	Nenännokka cinerea F1 Q2	Queen	YNFC1	Q2	Finland	Nenännokka, Oulu	July 2020	Heikki Helanterä				QIagen
Sodalis-like (Hugann)	YES	YES*				Formica cinerea	Nenännokka cinerea F1 Q3	Queen	YNFC1	Q3	Finland	Nenännokka, Oulu	July 2020	Heikki Helanterä				QIagen
Sodalis-like (Hugann)	NO	YES				Formica cinerea	Nenännokka cinerea F1 Q4	Queen	YNFC1	Q4	Finland	Nenännokka, Oulu	July 2020	Heikki Helanterä				QIagen
Sodalis-like (Hugann)	YES	YES*				Formica cinerea	Nenännokka cinerea F1 Q5	Queen	YNFC1	Q5	Finland	Nenännokka, Oulu	July 2020	Heikki Helanterä				QIagen
Sodalis-like (Hugann)	NO	YES				Formica cinerea	Salonselkä cinerea F1_tube 1_Q1	Queen	YSFC1	Q1	Finland	Salonselkä, Oulu	July 2020	Heikki Helanterä				QIagen
Sodalis-like (Hugann)	NO	YES				Formica cinerea	Salonselkä cinerea F1_tube 1_Q2	Queen	YSFC1	Q2	Finland	Salonselkä, Oulu	July 2020	Heikki Helanterä				QIagen
Sodalis-like (Hugann)	NO	YES				Formica cinerea	Salonselkä cinerea F1_tube 1_Q3	Queen	YSFC1	Q3	Finland	Salonselkä, Oulu	July 2020	Heikki Helanterä				QIagen
Sodalis-like (Hugann)	NO	YES				Formica cinerea	Salonselkä cinerea F1_tube 1_Q4	Queen	YSFC1	Q4	Finland	Salonselkä, Oulu	July 2020	Heikki Helanterä				QIagen
Sodalis-like (Hugann)	NO	YES*				Formica cinerea	Salonselkä cinerea F1_tube 2_Q5	Queen	YSFC1	Q5	Finland	Salonselkä, Oulu	July 2020	Heikki Helanterä				QIagen
Sodalis-like (Hugann)	NO	YES				Formica cinerea	Salonselkä cinerea F1_tube 2_Q6	Queen	YSFC1	Q6	Finland	Salonselkä, Oulu	July 2020	Heikki Helanterä				QIagen
Sodalis-like (Hugann)	NO	YES*				Formica cinerea	Salonselkä cinerea F1_tube 2_Q7	Queen	YSFC1	Q7	Finland	Salonselkä, Oulu	July 2020	Heikki Helanterä				QIagen
Sodalis-like (Hugann)	NO	YES*				Formica cinerea	Salonselkä cinerea F1_tube 2_Q8	Queen	YSFC1	Q8	Finland	Salonselkä, Oulu	July 2020	Heikki Helanterä				QIagen
Sodalis-like (Hugann)	NO	YES				Formica cinerea	Salonselkä cinerea F2_Q1	Queen	YSFC2	Q1	Finland	Salonselkä, Oulu	July 2020	Heikki Helanterä				QIagen
Sodalis-like (Hugann)	NO	YES				Formica cinerea	Salonselkä cinerea F2_Q2	Queen	YSFC2	Q2	Finland	Salonselkä, Oulu	July 2020	Heikki Helanterä				QIagen
Sodalis-like (Hugann)	NO	YES				Formica cinerea	Salonselkä cinerea F2_Q3	Queen	YSFC2	Q3	Finland	Salonselkä, Oulu	July 2020	Heikki Helanterä				QIagen
Sodalis-like (Hugann)	NO	YES				Formica cinerea	Salonselkä cinerea F2_Q4	Queen	YSFC2	Q4	Finland	Salonselkä, Oulu	July 2020	Heikki Helanterä				QIagen
Sodalis-like (Hugann)	NO	YES				Formica cinerea	Salonselkä cinerea F2_Q5	Queen	YSFC2	Q5	Finland	Salonselkä, Oulu	July 2020	Heikki Helanterä				QIagen
Sodalis-like (Hugann)	NO	YES				Formica cinerea	Salonselkä cinerea F2_Q6	Queen	YSFC2	Q6	Finland	Salonselkä, Oulu	July 2020	Heikki Helanterä				QIagen
Sodalis-like (Hugann)	NO	YES				Formica cinerea	Salonselkä cinerea F3_Q1	Queen	YSFC3	Q1	Finland	Salonselkä, Oulu	July 2020	Heikki Helanterä				QIagen
Sodalis-like (Hugann)	NO	YES				Formica cinerea	Salonselkä cinerea F3_Q2	Queen	YSFC3	Q2	Finland	Salonselkä, Oulu	July 2020	Heikki Helanterä				QIagen
Sodalis-like (Hugann)	NO	YES				Formica cinerea	Salonselkä cinerea F3_Q3	Queen	YSFC3	Q3	Finland	Salonselkä, Oulu	July 2020	Heikki Helanterä				QIagen
Sodalis-like (Hugann)	NO	YES*				Formica cinerea	Salonselkä cinerea F3_Q4	Queen	YSFC3	Q4	Finland	Salonselkä, Oulu	July 2020	Heikki Helanterä				QIagen
Sodalis-like (Hugann)	YES	YES*				Formica cinerea	Salonselkä cinerea F3_Q5	Queen	YSFC3	Q5	Finland	Salonselkä, Oulu	July 2020	Heikki Helanterä				QIagen
Sodalis-like (Hugann)	NO	YES				Formica cinerea	Varjakka cinerea F1 Q1	Queen	YVFC1	Q1	Finland	Varjakka, Oulu	July 2020	Heikki Helanterä				QIagen
Sodalis-like (Hugann)	NO	YES				Formica cinerea	Varjakka cinerea F1 Q2	Queen	YVFC1	Q2	Finland	Varjakka, Oulu	July 2020	Heikki Helanterä				QIagen
Sodalis-like (Hugann)	NO	YES*				Formica cinerea	Varjakka cinerea F1 Q3	Queen	YVFC1	Q3	Finland	Varjakka, Oulu	July 2020	Heikki Helanterä				QIagen
Sodalis-like (Hugann)	NO	YES				Formica cinerea	Varjakka cinerea F1 Q4	Queen	YVFC1	Q4	Finland	Varjakka, Oulu	July 2020	Heikki Helanterä				QIagen
Sodalis-like (Hugann)	YES	YES				Formica cinerea	FCINEREA W1	Worker	(Online)	W1	Purchased Online			buy-ants.breezily.co.uk				QIagen
Sodalis-like (Hugann)	YES	YES				Formica cinerea	FCINEREA W10	Worker	(Online)	W10	Purchased Online			buy-ants.breezily.co.uk				QIagen
Sodalis-like (Hugann)	YES	YES				Formica cinerea	FCINEREA W2	Worker	(Online)	W2	Purchased Online			buy-ants.breezily.co.uk				QIagen
Sodalis-like (Hugann)	YES	YES				Formica cinerea	FCINEREA W3	Worker	(Online)	W3	Purchased Online			buy-ants.breezily.co.uk				QIagen
Sodalis-like (Hugann)	YES	YES				Formica cinerea	FCINEREA W4	Worker	(Online)	W4	Purchased Online			buy-ants.breezily.co.uk				QIagen
Sodalis-like (Hugann)	YES	YES				Formica cinerea	FCINEREA W5	Worker	(Online)	W5	Purchased Online			buy-ants.breezily.co.uk				QIagen
Sodalis-like (Hugann)	NO	YES				Formica cinerea	FCINEREA W6	Worker	(Online)	W6	Purchased Online			buy-ants.breezily.co.uk				QIagen
Sodalis-like (Hugann)	NO	YES				Formica cinerea	FCINEREA W7	Worker	(Online)	W7	Purchased Online			buy-ants.breezily.co.uk				QIagen
Sodalis-like (Hugann)	NO	YES				Formica cinerea	FCINEREA W8	Worker	(Online)	W8	Purchased Online			buy-ants.breezily.co.uk				QIagen
Sodalis-like (Hugann)	YES	YES				Formica cinerea	FCINEREA W9	Worker	(Online)	W9	Purchased Online			buy-ants.breezily.co.uk				QIagen
Sodalis-like (Hugann)	YES		YES	YES		Formica cinerea	ONLINE	Queen	(Online)		Purchased Online			buy-ants.breezily.co.uk	1_16S	332592	165818	Phenol
Sodalis-like (Hugann)	NO	YES	YES	YES		Formica cinerea	FCINBAR1-17 Q1	Queen	BAR1-17	Q1	France	Les Barges	2017	Michel Chapuisat	2_16S	237123	51659	QIagen
Sodalis-like (Hugann)	NO	YES	YES	YES		Formica cinerea	FCINBAR1-17 Q2	Queen	BAR1-17	Q2	France	Les Barges	2017	Michel Chapuisat	2_16S	251216	48229	QIagen
Sodalis-like (Hugann)	NO	YES	YES	YES		Formica cinerea	FCINBAR18-17 Q1	Queen	BAR 18-17	Q1	France	Les Barges	2017	Michel Chapuisat	2_16S	282061	56052	QIagen
Sodalis-like (Hugann)	NO	YES*	YES			Formica cinerea	FCINBAR2-17 Q1	Queen	BAR2-17	Q1	France	Les Barges	2017	Michel Chapuisat	2_16S	227504	43710	QIagen
Sodalis-like (Hugann)	NO	YES	YES	YES		Formica cinerea	FCINBAR2-17 Q2	Queen	BAR2-17	Q2	France	Les Barges	2017	Michel Chapuisat	2_16S	294106	40970	QIagen
Sodalis-like (Hugann)	NO	YES*	YES			Formica cinerea	FCINBAR7-17 Q1	Queen	BAR 7-17	Q1	France	Les Barges	2017	Michel Chapuisat	2_16S	315342	65235	QIagen
Sodalis-like (Hugann)	NO		YES			Formica cunicularia	ONLINECUNI	Queen			Purchased Online			antstore.net	1_16S	138605	72272	Phenol
Sodalis-like (Hugann)	NO		YES	YES		Formica exsecta	FEOBY 1 Q	Queen	1		Finland	Öby, Raasepori	May 2017	Heikki Helanterä	2_16S	719499	208593	QIagen
Sodalis-like (Hugann)	NO		YES			Formica exsecta	FEOBY 4 Q	Queen	4		Finland	Öby, Raasepori	May 2017	Heikki Helanterä	2_16S	415023	113406	QIagen
Sodalis-like (Hugann)	NO		YES			Formica exsecta	FEOBY 5 Q	Queen	5		Finland	Öby, Raasepori	May 2017	Heikki Helanterä	2_16S	406159	93889	QIagen
Sodalis-like (Hugann)	NO		YES	YES		Formica exsecta	FEOBY 6 Q	Queen	6		Finland	Öby, Raasepori	May 2017	Heikki Helanterä	2_16S	337172	76533	QIagen
Sodalis-like (Hugann)	NO		YES			Formica exsecta	FEOBY1Q	Queen	1		Finland	Öby, Raasepori	May 2017	Heikki Helanterä	1_16S	54415	22879	Phenol
Sodalis-like (Hugann)	NO		YES			Formica exsecta	FEOBY2Q	Queen	2		Finland	Öby, Raasepori	May 2017	Heikki Helanterä	1_16S	55546	21087	Phenol
Sodalis-like (Hugann)	NO		YES			Formica exsecta	FEOBY3Q	Queen	3		Finland	Öby, Raasepori	May 2017	Heikki Helanterä	1_16S	73693	39358	Phenol
Sodalis-like (Hugann)	NO		YES			Formica exsecta	FEOBY4Q	Queen	4		Finland	Öby, Raasepori	May 2017	Heikki Helanterä	1_16S	87313	33141	Phenol
Sodalis-like (Hugann)	NO		YES			Formica exsecta	FEOBY5Q	Queen	5		Finland	Öby, Raasepori	May 2017	Heikki Helanterä	1_16S	300113	155550	Phenol
Sodalis-like (Hugann)	NO		YES			Formica exsecta	FEOBY6Q	Queen	6		Finland	Öby, Raasepori	May 2017	Heikki Helanterä	1_16S	87995	32571	Phenol
Sodalis-like (Hugann)	YES	YES				Formica fusca	FFA W1	Worker	A	W1	Finland	Lappohja, Hanko	May 2017	Heikki Helanterä				QIagen
Sodalis-like (Hugann)	YES	YES				Formica fusca	FFA W10	Worker	A	W10	Finland	Lappohja, Hanko	May 2017	Heikki Helanterä				QIagen
Sodalis-like (Hugann)	YES	YES				Formica fusca	FFA W2	Worker	A	W2	Finland	Lappohja, Hanko	May 2017	Heikki Helanterä				QIagen
Sodalis-like (Hugann)	YES	YES				Formica fusca	FFA W3	Worker	A	W3	Finland	Lappohja, Hanko	May 2017	Heikki Helanterä				QIagen
Sodalis-like (Hugann)	YES	YES				Formica fusca	FFA W4	Worker	A	W4	Finland	Lappohja, Hanko	May 2017	Heikki Helanterä				QIagen
Sodalis-like (Hugann)	YES	YES				Formica fusca	FFA W5	Worker	A	W5	Finland	Lappohja, Hanko	May 2017	Heikki Helanterä				QIagen
Sodalis-like (Hugann)	YES	YES				Formica fusca	FFA W6	Worker	A	W6	Finland	Lappohja, Hanko	May 2017	Heikki Helanterä				QIagen
Sodalis-like (Hugann)	YES	YES				Formica fusca	FFA W7	Worker	A	W7	Finland	Lappohja, Hanko	May 2017	Heikki Helanterä				QIagen
Sodalis-like (Hugann)	YES	YES				Formica fusca	FFA W8	Worker	A	W8	Finland	Lappohja, Hanko	May 2017	Heikki Helanterä				QIagen
Sodalis-like (Hugann)	YES	YES				Formica fusca	FFA W9	Worker	A	W9	Finland	Lappohja, Hanko	May 2017	Heikki Helanterä				QIagen
Sodalis-like (Hugann)	YES	YES				Formica fusca	FFA3 W1	Worker	A3	W1	Finland	Hyytiälä, Juupajoki	May 2017	Heikki Helanterä				QIagen
Sodalis-like (Hugann)	YES	YES				Formica fusca	FFA3 W10	Worker	A3	W10	Finland	Hyytiälä, Juupajoki	May 2017	Heikki Helanterä				QIagen
Sodalis-like (Hugann)	YES	YES				Formica fusca	FFA3 W2	Worker	A3	W2	Finland	Hyytiälä, Juupajoki	May 2017	Heikki Helanterä				QIagen
Sodalis-like (Hugann)	YES	YES				Formica fusca	FFA3 W3	Worker	A3	W3	Finland	Hyytiälä, Juupajoki	May 2017	Heikki Helanterä				QIagen
Sodalis-like (Hugann)	YES	YES				Formica fusca	FFA3 W4	Worker	A3	W4	Finland	Hyytiälä, Juupajoki	May 2017	Heikki Helanterä				QIagen
Sodalis-like (Hugann)	YES	YES				Formica fusca	FFA3 W5	Worker	A3	W5	Finland	Hyytiälä, Juupajoki	May 2017	Heikki Helanterä				QIagen
Sodalis-like (Hugann)	YES	YES				Formica fusca	FFA3 W6	Worker	A3	W6	Finland	Hyytiälä, Juupajoki	May 2017	Heikki Helanterä				QIagen
Sodalis-like (Hugann)	YES	YES				Formica fusca	FFA3 W7	Worker	A3	W7	Finland	Hyytiälä, Juupajoki	May 2017	Heikki Helanterä				QIagen
Sodalis-like (Hugann)	YES	YES				Formica fusca	FFA3 W8	Worker	A3	W8	Finland	Hyytiälä, Juupajoki	May 2017	Heikki Helanterä				QIagen
Sodalis-like (Hugann)	YES	YES				Formica fusca	FFA3 W9	Worker	A3	W9	Finland	Hyytiälä, Juupajoki	May 2017	Heikki Helanterä				QIagen
Sodalis-like (Hugann)	YES		YES			Formica fusca	FFA3Q	Queen	3		Finland	Hyytiälä, Juupajoki	May 2017	Heikki Helanterä	1_16S	249618	120668	Phenol
Sodalis-like (Hugann)	YES	YES	YES			Formica fusca	FFB Q1	Queen	B	Q1	Finland	Lappohja, Hanko	May 2017	Heikki Helanterä	2_16S	228844	65110	QIagen
Sodalis-like (Hugann)	YES	YES*				Formica fusca	FFB Q2	Queen	B	Q2	Finland	Lappohja, Hanko	May 2017	Heikki Helanterä				QIagen
Sodalis-like (Hugann)	YES	YES	YES			Formica fusca	FFB Q3	Queen	B	Q3	Finland	Lappohja, Hanko	May 2017	Heikki Helanterä	2_16S	278386	78080	QIagen
Sodalis-like (Hugann)	YES	YES				Formica fusca	FFB W1	Worker	B	W1	Finland	Lappohja, Hanko	May 2017	Heikki Helanterä				QIagen
Sodalis-like (Hugann)	YES	YES				Formica fusca	FFB W10	Worker	B	W10	Finland	Lappohja, Hanko	May 2017	Heikki Helanterä				QIagen
Sodalis-like (Hugann)	YES	YES				Formica fusca	FFB W2	Worker	B	W2	Finland	Lappohja, Hanko	May 2017	Heikki Helanterä				QIagen
Sodalis-like (Hugann)	YES	YES				Formica fusca	FFB W3	Worker	B	W3	Finland	Lappohja, Hanko	May 2017	Heikki Helanterä				QIagen
Sodalis-like (Hugann)	YES	YES				Formica fusca	FFB W4	Worker	B	W4	Finland	Lappohja, Hanko	May 2017	Heikki Helanterä				QIagen
Sodalis-like (Hugann)	YES	YES				Formica fusca	FFB W5	Worker	B	W5	Finland	Lappohja, Hanko	May 2017	Heikki Helanterä				QIagen
Sodalis-like (Hugann)	YES	YES				Formica fusca	FFB W6	Worker	B	W6	Finland	Lappohja, Hanko	May 2017	Heikki Helanterä				QIagen
Sodalis-like (Hugann)	YES	YES				Formica fusca	FFB W7	Worker	B	W7	Finland	Lappohja, Hanko	May 2017	Heikki Helanterä				QIagen
Sodalis-like (Hugann)	YES	YES				Formica fusca	FFB W8	Worker	B	W8	Finland	Lappohja, Hanko	May 2017	Heikki Helanterä				QIagen
Sodalis-like (Hugann)	YES	YES				Formica fusca	FFB W9	Worker	B	W9	Finland	Lappohja, Hanko	May 2017	Heikki Helanterä				QIagen
Sodalis-like (Hugann)	YES	YES	YES			Formica fusca	FFB10 Q1	Queen	B10	Q1	Finland	Hyytiälä, Juupajoki	May 2017	Heikki Helanterä	2_16S	221498	66286	QIagen
Sodalis-like (Hugann)	YES	YES				Formica fusca	FFB10 W1	Worker	B10	W1	Finland	Hyytiälä, Juupajoki	May 2017	Heikki Helanterä				QIagen
Sodalis-like (Hugann)	YES	YES				Formica fusca	FFB10 W10	Worker	B10	W10	Finland	Hyytiälä, Juupajoki	May 2017	Heikki Helanterä				QIagen
Sodalis-like (Hugann)	YES	YES				Formica fusca	FFB10 W2	Worker	B10	W2	Finland	Hyytiälä, Juupajoki	May 2017	Heikki Helanterä				QIagen
Sodalis-like (Hugann)	YES	YES				Formica fusca	FFB10 W3	Worker	B10	W3	Finland	Hyytiälä, Juupajoki	May 2017	Heikki Helanterä				QIagen
Sodalis-like (Hugann)	YES	YES				Formica fusca	FFB10 W4	Worker	B10	W4	Finland	Hyytiälä, Juupajoki	May 2017	Heikki Helanterä				QIagen
Sodalis-like (Hugann)	YES	YES				Formica fusca	FFB10 W5	Worker	B10	W5	Finland	Hyytiälä, Juupajoki	May 2017	Heikki Helanterä				QIagen
Sodalis-like (Hugann)	YES	YES				Formica fusca	FFB10 W6	Worker	B10	W6	Finland	Hyytiälä, Juupajoki	May 2017	Heikki Helanterä				QIagen
Sodalis-like (Hugann)	YES	YES				Formica fusca	FFB10 W7	Worker	B10	W7	Finland	Hyytiälä, Juupajoki	May 2017	Heikki Helanterä				QIagen
Sodalis-like (Hugann)	YES	YES				Formica fusca	FFB10 W8	Worker	B10	W8	Finland	Hyytiälä, Juupajoki	May 2017	Heikki Helanterä				QIagen
Sodalis-like (Hugann)	YES	YES				Formica fusca	FFB10 W9	Worker	B10	W9	Finland	Hyytiälä, Juupajoki	May 2017	Heikki Helanterä				QIagen
Sodalis-like (Hugann)	YES	YES	YES			Formica fusca	FFB8 Q1	Queen	B8	Q1	Finland	Hyytiälä, Juupajoki	May 2017	Heikki Helanterä	2_16S	282193	83771	QIagen
Sodalis-like (Hugann)	YES	YES*				Formica fusca	FFB8 Q10	Queen	B8	Q10	Finland	Hyytiälä, Juupajoki	May 2017	Heikki Helanterä				QIagen
Sodalis-like (Hugann)	YES	YES*				Formica fusca	FFB8 Q2	Queen	B8	Q2	Finland	Hyytiälä, Juupajoki	May 2017	Heikki Helanterä				QIagen
Sodalis-like (Hugann)	YES	YES*				Formica fusca	FFB8 Q3	Queen	B8	Q3	Finland	Hyytiälä, Juupajoki	May 2017	Heikki Helanterä				QIagen
Sodalis-like (Hugann)	YES	YES*				Formica fusca	FFB8 Q4	Queen	B8	Q4	Finland	Hyytiälä, Juupajoki	May 2017	Heikki Helanterä				QIagen
Sodalis-like (Hugann)	YES	YES*				Formica fusca	FFB8 Q5	Queen	B8	Q5	Finland	Hyytiälä, Juupajoki	May 2017	Heikki Helanterä				QIagen
Sodalis-like (Hugann)	YES	YES*				Formica fusca	FFB8 Q6	Queen	B8	Q6	Finland	Hyytiälä, Juupajoki	May 2017	Heikki Helanterä				QIagen
Sodalis-like (Hugann)	YES	YES*				Formica fusca	FFB8 Q7	Queen	B8	Q7	Finland	Hyytiälä, Juupajoki	May 2017	Heikki Helanterä				QIagen
Sodalis-like (Hugann)	YES	YES*				Formica fusca	FFB8 Q8	Queen	B8	Q8	Finland	Hyytiälä, Juupajoki	May 2017	Heikki Helanterä				QIagen
Sodalis-like (Hugann)	YES	YES	YES			Formica fusca	FFB8 Q9	Queen	B8	Q9	Finland	Hyytiälä, Juupajoki	May 2017	Heikki Helanterä	2_16S	250268	73053	QIagen
Sodalis-like (Hugann)	YES	YES				Formica fusca	FFB8 W1	Worker	B8	W1	Finland	Hyytiälä, Juupajoki	May 2017	Heikki Helanterä				QIagen
Sodalis-like (Hugann)	YES	YES				Formica fusca	FFB8 W10	Worker	B8	W10	Finland	Hyytiälä, Juupajoki	May 2017	Heikki Helanterä				QIagen
Sodalis-like (Hugann)	YES	YES				Formica fusca	FFB8 W11 ABDOMEN	Worker	B8	W11	Finland	Hyytiälä, Juupajoki	May 2017	Heikki Helanterä				QIagen
Sodalis-like (Hugann)	YES	YES				Formica fusca	FFB8 W12 ABDOMEN	Worker	B8	W12	Finland	Hyytiälä, Juupajoki	May 2017	Heikki Helanterä				QIagen
Sodalis-like (Hugann)	YES	YES				Formica fusca	FFB8 W13 ABDOMEN	Worker	B8	W13	Finland	Hyytiälä, Juupajoki	May 2017	Heikki Helanterä				QIagen
Sodalis-like (Hugann)	YES	YES				Formica fusca	FFB8 W14 ABDOMEN	Worker	B8	W14	Finland	Hyytiälä, Juupajoki	May 2017	Heikki Helanterä				QIagen
Sodalis-like (Hugann)	YES	YES				Formica fusca	FFB8 W15 ABDOMEN	Worker	B8	W15	Finland	Hyytiälä, Juupajoki	May 2017	Heikki Helanterä				QIagen
Sodalis-like (Hugann)	YES	YES				Formica fusca	FFB8 W2	Worker	B8	W2	Finland	Hyytiälä, Juupajoki	May 2017	Heikki Helanterä				QIagen
Sodalis-like (Hugann)	YES	YES				Formica fusca	FFB8 W3	Worker	B8	W3	Finland	Hyytiälä, Juupajoki	May 2017	Heikki Helanterä				QIagen
Sodalis-like (Hugann)	YES	YES				Formica fusca	FFB8 W4	Worker	B8	W4	Finland	Hyytiälä, Juupajoki	May 2017	Heikki Helanterä				QIagen
Sodalis-like (Hugann)	YES	YES				Formica fusca	FFB8 W5	Worker	B8	W5	Finland	Hyytiälä, Juupajoki	May 2017	Heikki Helanterä				QIagen
Sodalis-like (Hugann)	YES	YES				Formica fusca	FFB8 W6	Worker	B8	W6	Finland	Hyytiälä, Juupajoki	May 2017	Heikki Helanterä				QIagen
Sodalis-like (Hugann)	YES	YES				Formica fusca	FFB8 W7	Worker	B8	W7	Finland	Hyytiälä, Juupajoki	May 2017	Heikki Helanterä				QIagen
Sodalis-like (Hugann)	YES	YES				Formica fusca	FFB8 W8	Worker	B8	W8	Finland	Hyytiälä, Juupajoki	May 2017	Heikki Helanterä				QIagen
Sodalis-like (Hugann)	YES	YES				Formica fusca	FFB8 W9	Worker	B8	W9	Finland	Hyytiälä, Juupajoki	May 2017	Heikki Helanterä				QIagen
Sodalis-like (Hugann)	YES		YES			Formica fusca	FFB8Q	Queen	8		Finland	Hyytiälä, Juupajoki	May 2017	Heikki Helanterä	1_16S	352385	154314	Phenol
Sodalis-like (Hugann)	YES	YES	YES			Formica fusca	FFC Q1	Queen	C	Q1	Finland	Lappohja, Hanko	May 2017	Heikki Helanterä	2_16S	239651	69168	QIagen
Sodalis-like (Hugann)	YES	YES*				Formica fusca	FFC Q10	Queen	C	Q10	Finland	Lappohja, Hanko	May 2017	Heikki Helanterä				QIagen
Sodalis-like (Hugann)	YES	YES*				Formica fusca	FFC Q11	Queen	C	Q11	Finland	Lappohja, Hanko	May 2017	Heikki Helanterä				QIagen
Sodalis-like (Hugann)	YES	YES*				Formica fusca	FFC Q12	Queen	C	Q12	Finland	Lappohja, Hanko	May 2017	Heikki Helanterä				QIagen
Sodalis-like (Hugann)	YES	YES*				Formica fusca	FFC Q3	Queen	C	Q3	Finland	Lappohja, Hanko	May 2017	Heikki Helanterä				QIagen
Sodalis-like (Hugann)	YES	YES*				Formica fusca	FFC Q4	Queen	C	Q4	Finland	Lappohja, Hanko	May 2017	Heikki Helanterä				QIagen
Sodalis-like (Hugann)	YES	YES*				Formica fusca	FFC Q5	Queen	C	Q5	Finland	Lappohja, Hanko	May 2017	Heikki Helanterä				QIagen
Sodalis-like (Hugann)	YES	YES*				Formica fusca	FFC Q6	Queen	C	Q6	Finland	Lappohja, Hanko	May 2017	Heikki Helanterä				QIagen
Sodalis-like (Hugann)	YES	YES*				Formica fusca	FFC Q7	Queen	C	Q7	Finland	Lappohja, Hanko	May 2017	Heikki Helanterä				QIagen
Sodalis-like (Hugann)	YES	YES	YES			Formica fusca	FFC Q8	Queen	C	Q8	Finland	Lappohja, Hanko	May 2017	Heikki Helanterä	2_16S	282858	82869	QIagen
Sodalis-like (Hugann)	YES	YES*				Formica fusca	FFC Q9	Queen	C	Q9	Finland	Lappohja, Hanko	May 2017	Heikki Helanterä				QIagen
Sodalis-like (Hugann)	YES	YES				Formica fusca	FFC W1	Worker	C	W1	Finland	Lappohja, Hanko	May 2017	Heikki Helanterä				QIagen
Sodalis-like (Hugann)	YES	YES				Formica fusca	FFC W2	Worker	C	W2	Finland	Lappohja, Hanko	May 2017	Heikki Helanterä				QIagen
Sodalis-like (Hugann)	YES	YES				Formica fusca	FFC W3	Worker	C	W3	Finland	Lappohja, Hanko	May 2017	Heikki Helanterä				QIagen
Sodalis-like (Hugann)	YES	YES				Formica fusca	FFC W4	Worker	C	W4	Finland	Lappohja, Hanko	May 2017	Heikki Helanterä				QIagen
Sodalis-like (Hugann)	YES	YES				Formica fusca	FFC W5	Worker	C	W5	Finland	Lappohja, Hanko	May 2017	Heikki Helanterä				QIagen
Sodalis-like (Hugann)	YES	YES				Formica fusca	FFC W6	Worker	C	W6	Finland	Lappohja, Hanko	May 2017	Heikki Helanterä				QIagen
Sodalis-like (Hugann)	YES	YES				Formica fusca	FFC W7	Worker	C	W7	Finland	Lappohja, Hanko	May 2017	Heikki Helanterä				QIagen
Sodalis-like (Hugann)	YES	YES				Formica fusca	FFC W8	Worker	C	W8	Finland	Lappohja, Hanko	May 2017	Heikki Helanterä				QIagen
Sodalis-like (Hugann)	YES	YES				Formica fusca	FFC W9	Worker	C	W9	Finland	Lappohja, Hanko	May 2017	Heikki Helanterä				QIagen
Sodalis-like (Hugann)	YES	YES				Formica fusca	FFD W1	Worker	D	W1	Finland	Lappohja, Hanko	May 2017	Heikki Helanterä				QIagen
Sodalis-like (Hugann)	YES	YES				Formica fusca	FFD W10	Worker	D	W10	Finland	Lappohja, Hanko	May 2017	Heikki Helanterä				QIagen
Sodalis-like (Hugann)	YES	YES				Formica fusca	FFD W2	Worker	D	W2	Finland	Lappohja, Hanko	May 2017	Heikki Helanterä				QIagen
Sodalis-like (Hugann)	YES	YES				Formica fusca	FFD W3	Worker	D	W3	Finland	Lappohja, Hanko	May 2017	Heikki Helanterä				QIagen
Sodalis-like (Hugann)	YES	YES				Formica fusca	FFD W4	Worker	D	W4	Finland	Lappohja, Hanko	May 2017	Heikki Helanterä				QIagen
Sodalis-like (Hugann)	YES	YES				Formica fusca	FFD W5	Worker	D	W5	Finland	Lappohja, Hanko	May 2017	Heikki Helanterä				QIagen
Sodalis-like (Hugann)	YES	YES				Formica fusca	FFD W6	Worker	D	W6	Finland	Lappohja, Hanko	May 2017	Heikki Helanterä				QIagen
Sodalis-like (Hugann)	YES	YES				Formica fusca	FFD W7	Worker	D	W7	Finland	Lappohja, Hanko	May 2017	Heikki Helanterä				QIagen
Sodalis-like (Hugann)	YES	YES				Formica fusca	FFD W8	Worker	D	W8	Finland	Lappohja, Hanko	May 2017	Heikki Helanterä				QIagen
Sodalis-like (Hugann)	YES	YES				Formica fusca	FFD W9	Worker	D	W9	Finland	Lappohja, Hanko	May 2017	Heikki Helanterä				QIagen
Sodalis-like (Hugann)	YES	YES				Formica fusca	FFE W1	Worker	E	W1	Finland	Lappohja, Hanko	May 2017	Heikki Helanterä				QIagen
Sodalis-like (Hugann)	YES	YES				Formica fusca	FFE W10	Worker	E	W10	Finland	Lappohja, Hanko	May 2017	Heikki Helanterä				QIagen
Sodalis-like (Hugann)	YES	YES				Formica fusca	FFE W2	Worker	E	W2	Finland	Lappohja, Hanko	May 2017	Heikki Helanterä				QIagen
Sodalis-like (Hugann)	YES	YES				Formica fusca	FFE W3	Worker	E	W3	Finland	Lappohja, Hanko	May 2017	Heikki Helanterä				QIagen
Sodalis-like (Hugann)	YES	YES				Formica fusca	FFE W4	Worker	E	W4	Finland	Lappohja, Hanko	May 2017	Heikki Helanterä				QIagen
Sodalis-like (Hugann)	YES	YES				Formica fusca	FFE W5	Worker	E	W5	Finland	Lappohja, Hanko	May 2017	Heikki Helanterä				QIagen
Sodalis-like (Hugann)	YES	YES				Formica fusca	FFE W6	Worker	E	W6	Finland	Lappohja, Hanko	May 2017	Heikki Helanterä				QIagen
Sodalis-like (Hugann)	YES	YES				Formica fusca	FFE W7	Worker	E	W7	Finland	Lappohja, Hanko	May 2017	Heikki Helanterä				QIagen
Sodalis-like (Hugann)	YES	YES				Formica fusca	FFE W8	Worker	E	W8	Finland	Lappohja, Hanko	May 2017	Heikki Helanterä				QIagen
Sodalis-like (Hugann)	YES	YES				Formica fusca	FFE W9	Worker	E	W9	Finland	Lappohja, Hanko	May 2017	Heikki Helanterä				QIagen
Sodalis-like (Hugann)	YES	YES	YES			Formica fusca	FFF Q1	Queen	F	Q1	Finland	Lappohja, Hanko	May 2017	Heikki Helanterä	2_16S	286938	85436	QIagen
Sodalis-like (Hugann)	YES	YES*				Formica fusca	FFF Q3	Queen	F	Q3	Finland	Lappohja, Hanko	May 2017	Heikki Helanterä				QIagen
Sodalis-like (Hugann)	YES	YES*				Formica fusca	FFF Q4	Queen	F	Q4	Finland	Lappohja, Hanko	May 2017	Heikki Helanterä				QIagen
Sodalis-like (Hugann)	YES	YES	YES			Formica fusca	FFF Q5	Queen	F	Q5	Finland	Lappohja, Hanko	May 2017	Heikki Helanterä	2_16S	307177	91141	QIagen
Sodalis-like (Hugann)	YES	YES				Formica fusca	FFF W1	Worker	F	W1	Finland	Lappohja, Hanko	May 2017	Heikki Helanterä				QIagen
Sodalis-like (Hugann)	YES	YES				Formica fusca	FFF W10	Worker	F	W10	Finland	Lappohja, Hanko	May 2017	Heikki Helanterä				QIagen
Sodalis-like (Hugann)	YES	YES				Formica fusca	FFF W2	Worker	F	W2	Finland	Lappohja, Hanko	May 2017	Heikki Helanterä				QIagen
Sodalis-like (Hugann)	YES	YES				Formica fusca	FFF W3	Worker	F	W3	Finland	Lappohja, Hanko	May 2017	Heikki Helanterä				QIagen
Sodalis-like (Hugann)	YES	YES				Formica fusca	FFF W4	Worker	F	W4	Finland	Lappohja, Hanko	May 2017	Heikki Helanterä				QIagen
Sodalis-like (Hugann)	YES	YES				Formica fusca	FFF W5	Worker	F	W5	Finland	Lappohja, Hanko	May 2017	Heikki Helanterä				QIagen
Sodalis-like (Hugann)	YES	YES				Formica fusca	FFF W6	Worker	F	W6	Finland	Lappohja, Hanko	May 2017	Heikki Helanterä				QIagen
Sodalis-like (Hugann)	YES	YES				Formica fusca	FFF W7	Worker	F	W7	Finland	Lappohja, Hanko	May 2017	Heikki Helanterä				QIagen
Sodalis-like (Hugann)	YES	YES				Formica fusca	FFF W8	Worker	F	W8	Finland	Lappohja, Hanko	May 2017	Heikki Helanterä				QIagen
Sodalis-like (Hugann)	YES	YES				Formica fusca	FFF W9	Worker	F	W9	Finland	Lappohja, Hanko	May 2017	Heikki Helanterä				QIagen
Sodalis-like (Hugann)	YES				YES	Formica fusca	FFU-2-3	Queen			Finland			Heikki Helanterä				QIagen
Sodalis-like (Hugann)	YES		YES			Formica fusca	ONLINEFUS	Queen			Purchased Online			antsmynala.co.uk	1_16S	84033	42053	Phenol
Sodalis-like (Hugann)	YES		YES			Formica lemani	FLEA1 Q	Queen	A1	Q	Finland	Hyytiälä, Juupajoki	May 2017	Heikki Helanterä	1_16S	294461	146923	Phenol
Sodalis-like (Hugann)	YES	YES				Formica lemani	FLEA1 W1	Worker	A1	W1	Finland	Hyytiälä, Juupajoki	May 2017	Heikki Helanterä				QIagen
Sodalis-like (Hugann)	YES	YES				Formica lemani	FLEA1 W10	Worker	A1	W10	Finland	Hyytiälä, Juupajoki	May 2017	Heikki Helanterä				QIagen
Sodalis-like (Hugann)	YES	YES				Formica lemani	FLEA1 W2	Worker	A1	W2	Finland	Hyytiälä, Juupajoki	May 2017	Heikki Helanterä				QIagen
Sodalis-like (Hugann)	YES	YES				Formica lemani	FLEA1 W3	Worker	A1	W3	Finland	Hyytiälä, Juupajoki	May 2017	Heikki Helanterä				QIagen
Sodalis-like (Hugann)	YES	YES				Formica lemani	FLEA1 W4	Worker	A1	W4	Finland	Hyytiälä, Juupajoki	May 2017	Heikki Helanterä				QIagen
Sodalis-like (Hugann)	YES	YES				Formica lemani	FLEA1 W5	Worker	A1	W5	Finland	Hyytiälä, Juupajoki	May 2017	Heikki Helanterä				QIagen
Sodalis-like (Hugann)	YES	YES				Formica lemani	FLEA1 W6	Worker	A1	W6	Finland	Hyytiälä, Juupajoki	May 2017	Heikki Helanterä				QIagen
Sodalis-like (Hugann)	YES	YES				Formica lemani	FLEA1 W7	Worker	A1	W7	Finland	Hyytiälä, Juupajoki	May 2017	Heikki Helanterä				QIagen
Sodalis-like (Hugann)	YES	YES				Formica lemani	FLEA1 W8	Worker	A1	W8	Finland	Hyytiälä, Juupajoki	May 2017	Heikki Helanterä				QIagen
Sodalis-like (Hugann)	YES	YES				Formica lemani	FLEA1 W9	Worker	A1	W9	Finland	Hyytiälä, Juupajoki	May 2017	Heikki Helanterä				QIagen
Sodalis-like (Hugann)	YES		YES			Formica lemani	FLEA2 Q	Queen	A2	Q	Finland	Hyytiälä, Juupajoki	May 2017	Heikki Helanterä	1_16S	340043	189871	Phenol
Sodalis-like (Hugann)	YES	YES				Formica lemani	FLEA2 W1	Worker	A2	W1	Finland	Hyytiälä, Juupajoki	May 2017	Heikki Helanterä				QIagen
Sodalis-like (Hugann)	YES	YES				Formica lemani	FLEA2 W10	Worker	A2	W10	Finland	Hyytiälä, Juupajoki	May 2017	Heikki Helanterä				QIagen
Sodalis-like (Hugann)	YES	YES				Formica lemani	FLEA2 W2	Worker	A2	W2	Finland	Hyytiälä, Juupajoki	May 2017	Heikki Helanterä				QIagen
Sodalis-like (Hugann)	YES	YES				Formica lemani	FLEA2 W3	Worker	A2	W3	Finland	Hyytiälä, Juupajoki	May 2017	Heikki Helanterä				QIagen
Sodalis-like (Hugann)	YES	YES				Formica lemani	FLEA2 W4	Worker	A2	W4	Finland	Hyytiälä, Juupajoki	May 2017	Heikki Helanterä				QIagen
Sodalis-like (Hugann)	YES	YES				Formica lemani	FLEA2 W5	Worker	A2	W5	Finland	Hyytiälä, Juupajoki	May 2017	Heikki Helanterä				QIagen
Sodalis-like (Hugann)	YES	YES				Formica lemani	FLEA2 W6	Worker	A2	W6	Finland	Hyytiälä, Juupajoki	May 2017	Heikki Helanterä				QIagen
Sodalis-like (Hugann)	YES	YES				Formica lemani	FLEA2 W7	Worker	A2	W7	Finland	Hyytiälä, Juupajoki	May 2017	Heikki Helanterä				QIagen
Sodalis-like (Hugann)	YES	YES				Formica lemani	FLEA2 W8	Worker	A2	W8	Finland	Hyytiälä, Juupajoki	May 2017	Heikki Helanterä				QIagen
Sodalis-like (Hugann)	YES	YES				Formica lemani	FLEA2 W9	Worker	A2	W9	Finland	Hyytiälä, Juupajoki	May 2017	Heikki Helanterä				QIagen
Sodalis-like (Hugann)	YES		YES			Formica lemani	FLEB1 Q	Queen	B1	Q	Finland	Hyytiälä, Juupajoki	May 2017	Heikki Helanterä	1_16S	624868	330929	Phenol
Sodalis-like (Hugann)	YES	YES				Formica lemani	FLEB1 W1	Worker	B1	W1	Finland	Hyytiälä, Juupajoki	May 2017	Heikki Helanterä				QIagen
Sodalis-like (Hugann)	YES	YES				Formica lemani	FLEB1 W10	Worker	B1	W10	Finland	Hyytiälä, Juupajoki	May 2017	Heikki Helanterä				QIagen
Sodalis-like (Hugann)	YES	YES				Formica lemani	FLEB1 W2	Worker	B1	W2	Finland	Hyytiälä, Juupajoki	May 2017	Heikki Helanterä				QIagen
Sodalis-like (Hugann)	YES	YES				Formica lemani	FLEB1 W3	Worker	B1	W3	Finland	Hyytiälä, Juupajoki	May 2017	Heikki Helanterä				QIagen
Sodalis-like (Hugann)	YES	YES				Formica lemani	FLEB1 W4	Worker	B1	W4	Finland	Hyytiälä, Juupajoki	May 2017	Heikki Helanterä				QIagen
Sodalis-like (Hugann)	YES	YES				Formica lemani	FLEB1 W5	Worker	B1	W5	Finland	Hyytiälä, Juupajoki	May 2017	Heikki Helanterä				QIagen
Sodalis-like (Hugann)	YES	YES				Formica lemani	FLEB1 W6	Worker	B1	W6	Finland	Hyytiälä, Juupajoki	May 2017	Heikki Helanterä				QIagen
Sodalis-like (Hugann)	YES	YES				Formica lemani	FLEB1 W7	Worker	B1	W7	Finland	Hyytiälä, Juupajoki	May 2017	Heikki Helanterä				QIagen
Sodalis-like (Hugann)	YES	YES				Formica lemani	FLEB1 W8	Worker	B1	W8	Finland	Hyytiälä, Juupajoki	May 2017	Heikki Helanterä				QIagen
Sodalis-like (Hugann)	YES	YES				Formica lemani	FLEB1 W9	Worker	B1	W9	Finland	Hyytiälä, Juupajoki	May 2017	Heikki Helanterä				QIagen
Sodalis-like (Hugann)	YES		YES			Formica lemani	FLEB11 Q	Queen	B11	Q	Finland	Hyytiälä, Juupajoki	May 2017	Heikki Helanterä	1_16S	101829	48825	Phenol
Sodalis-like (Hugann)	YES	YES				Formica lemani	FLEB11 W1	Worker	B11	W1	Finland	Hyytiälä, Juupajoki	May 2017	Heikki Helanterä				QIagen
Sodalis-like (Hugann)	YES	YES				Formica lemani	FLEB11 W10	Worker	B11	W10	Finland	Hyytiälä, Juupajoki	May 2017	Heikki Helanterä				QIagen
Sodalis-like (Hugann)	YES	YES				Formica lemani	FLEB11 W2	Worker	B11	W2	Finland	Hyytiälä, Juupajoki	May 2017	Heikki Helanterä				QIagen
Sodalis-like (Hugann)	YES	YES				Formica lemani	FLEB11 W3	Worker	B11	W3	Finland	Hyytiälä, Juupajoki	May 2017	Heikki Helanterä				QIagen
Sodalis-like (Hugann)	YES	YES				Formica lemani	FLEB11 W4	Worker	B11	W4	Finland	Hyytiälä, Juupajoki	May 2017	Heikki Helanterä				QIagen
Sodalis-like (Hugann)	YES	YES				Formica lemani	FLEB11 W5	Worker	B11	W5	Finland	Hyytiälä, Juupajoki	May 2017	Heikki Helanterä				QIagen
Sodalis-like (Hugann)	YES	YES				Formica lemani	FLEB11 W6	Worker	B11	W6	Finland	Hyytiälä, Juupajoki	May 2017	Heikki Helanterä				QIagen
Sodalis-like (Hugann)	NO	YES				Formica lemani	FLEB11 W7	Worker	B11	W7	Finland	Hyytiälä, Juupajoki	May 2017	Heikki Helanterä				QIagen
Sodalis-like (Hugann)	NO	YES				Formica lemani	FLEB11 W8	Worker	B11	W8	Finland	Hyytiälä, Juupajoki	May 2017	Heikki Helanterä				QIagen
Sodalis-like (Hugann)	NO	YES				Formica lemani	FLEB11 W9	Worker	B11	W9	Finland	Hyytiälä, Juupajoki	May 2017	Heikki Helanterä				QIagen
Sodalis-like (Hugann)	YES		YES			Formica lemani	FLEB2 Q	Queen	B2	Q	Finland	Hyytiälä, Juupajoki	May 2017	Heikki Helanterä	1_16S	99149	53126	Phenol
Sodalis-like (Hugann)	YES	YES*				Formica lemani	FLEB2 Q1	Queen	B2	Q1	Finland	Hyytiälä, Juupajoki	May 2017	Heikki Helanterä				QIagen
Sodalis-like (Hugann)	YES	YES*				Formica lemani	FLEB2 Q2	Queen	B2	Q2	Finland	Hyytiälä, Juupajoki	May 2017	Heikki Helanterä				QIagen
Sodalis-like (Hugann)	YES	YES*				Formica lemani	FLEB2 Q3	Queen	B2	Q3	Finland	Hyytiälä, Juupajoki	May 2017	Heikki Helanterä				QIagen
Sodalis-like (Hugann)	YES	YES				Formica lemani	FLEB2 W1	Worker	B2	W1	Finland	Hyytiälä, Juupajoki	May 2017	Heikki Helanterä				QIagen
Sodalis-like (Hugann)	YES	YES				Formica lemani	FLEB2 W10	Worker	B2	W10	Finland	Hyytiälä, Juupajoki	May 2017	Heikki Helanterä				QIagen
Sodalis-like (Hugann)	YES	YES				Formica lemani	FLEB2 W2	Worker	B2	W2	Finland	Hyytiälä, Juupajoki	May 2017	Heikki Helanterä				QIagen
Sodalis-like (Hugann)	YES	YES				Formica lemani	FLEB2 W3	Worker	B2	W3	Finland	Hyytiälä, Juupajoki	May 2017	Heikki Helanterä				QIagen
Sodalis-like (Hugann)	YES	YES				Formica lemani	FLEB2 W4	Worker	B2	W4	Finland	Hyytiälä, Juupajoki	May 2017	Heikki Helanterä				QIagen
Sodalis-like (Hugann)	YES	YES				Formica lemani	FLEB2 W5	Worker	B2	W5	Finland	Hyytiälä, Juupajoki	May 2017	Heikki Helanterä				QIagen
Sodalis-like (Hugann)	YES	YES				Formica lemani	FLEB2 W6	Worker	B2	W6	Finland	Hyytiälä, Juupajoki	May 2017	Heikki Helanterä				QIagen
Sodalis-like (Hugann)	YES	YES				Formica lemani	FLEB2 W7	Worker	B2	W7	Finland	Hyytiälä, Juupajoki	May 2017	Heikki Helanterä				QIagen
Sodalis-like (Hugann)	YES	YES				Formica lemani	FLEB2 W8	Worker	B2	W8	Finland	Hyytiälä, Juupajoki	May 2017	Heikki Helanterä				QIagen
Sodalis-like (Hugann)	YES	YES				Formica lemani	FLEB2 W9	Worker	B2	W9	Finland	Hyytiälä, Juupajoki	May 2017	Heikki Helanterä				QIagen
Sodalis-like (Hugann)	YES		YES			Formica lemani	FLEB3 Q	Queen	B3	Q	Finland	Hyytiälä, Juupajoki	May 2017	Heikki Helanterä	1_16S	649870	238102	Phenol
Sodalis-like (Hugann)	YES	YES*				Formica lemani	FLEB3 Q1	Queen	B3	Q1	Finland	Hyytiälä, Juupajoki	May 2017	Heikki Helanterä				QIagen
Sodalis-like (Hugann)	YES	YES				Formica lemani	FLEB3 W1	Worker	B3	W1	Finland	Hyytiälä, Juupajoki	May 2017	Heikki Helanterä				QIagen
Sodalis-like (Hugann)	YES	YES				Formica lemani	FLEB3 W10	Worker	B3	W10	Finland	Hyytiälä, Juupajoki	May 2017	Heikki Helanterä				QIagen
Sodalis-like (Hugann)	YES	YES				Formica lemani	FLEB3 W11	Worker	B3	W11	Finland	Hyytiälä, Juupajoki	May 2017	Heikki Helanterä				QIagen
Sodalis-like (Hugann)	YES	YES				Formica lemani	FLEB3 W12	Worker	B3	W12	Finland	Hyytiälä, Juupajoki	May 2017	Heikki Helanterä				QIagen
Sodalis-like (Hugann)	YES	YES				Formica lemani	FLEB3 W2	Worker	B3	W2	Finland	Hyytiälä, Juupajoki	May 2017	Heikki Helanterä				QIagen
Sodalis-like (Hugann)	YES	YES				Formica lemani	FLEB3 W3	Worker	B3	W3	Finland	Hyytiälä, Juupajoki	May 2017	Heikki Helanterä				QIagen
Sodalis-like (Hugann)	YES	YES				Formica lemani	FLEB3 W4	Worker	B3	W4	Finland	Hyytiälä, Juupajoki	May 2017	Heikki Helanterä				QIagen
Sodalis-like (Hugann)	YES	YES				Formica lemani	FLEB3 W5	Worker	B3	W5	Finland	Hyytiälä, Juupajoki	May 2017	Heikki Helanterä				QIagen
Sodalis-like (Hugann)	YES	YES				Formica lemani	FLEB3 W6	Worker	B3	W6	Finland	Hyytiälä, Juupajoki	May 2017	Heikki Helanterä				QIagen
Sodalis-like (Hugann)	YES	YES				Formica lemani	FLEB3 W7	Worker	B3	W7	Finland	Hyytiälä, Juupajoki	May 2017	Heikki Helanterä				QIagen
Sodalis-like (Hugann)	YES	YES				Formica lemani	FLEB3 W8	Worker	B3	W8	Finland	Hyytiälä, Juupajoki	May 2017	Heikki Helanterä				QIagen
Sodalis-like (Hugann)	YES	YES				Formica lemani	FLEB3 W9	Worker	B3	W9	Finland	Hyytiälä, Juupajoki	May 2017	Heikki Helanterä				QIagen
Sodalis-like (Hugann)	NO		YES			Formica lemani	FLEB4 Q	Queen	B4	Q	Finland	Hyytiälä, Juupajoki	May 2017	Heikki Helanterä	2_16S	13126	6241	QIagen
Sodalis-like (Hugann)	NO	YES	YES	YES		Formica lemani	FLEB4 Q1	Queen	B4	Q1	Finland	Hyytiälä, Juupajoki	May 2017	Heikki Helanterä	2_16S	361287	114276	QIagen
Sodalis-like (Hugann)	YES	YES*				Formica lemani	FLEB4 Q2	Queen	B4	Q2	Finland	Hyytiälä, Juupajoki	May 2017	Heikki Helanterä				QIagen
Sodalis-like (Hugann)	NO	YES	YES	YES		Formica lemani	FLEB4 Q3	Queen	B4	Q3	Finland	Hyytiälä, Juupajoki	May 2017	Heikki Helanterä	1_16S	337896	97260	Phenol
Sodalis-like (Hugann)	NO	YES				Formica lemani	FLEB4 W1	Worker	B4	W1	Finland	Hyytiälä, Juupajoki	May 2017	Heikki Helanterä				QIagen
Sodalis-like (Hugann)	NO	YES				Formica lemani	FLEB4 W10	Worker	B4	W10	Finland	Hyytiälä, Juupajoki	May 2017	Heikki Helanterä				QIagen
Sodalis-like (Hugann)	NO	YES				Formica lemani	FLEB4 W11	Worker	B4	W11	Finland	Hyytiälä, Juupajoki	May 2017	Heikki Helanterä				QIagen
Sodalis-like (Hugann)	NO	YES				Formica lemani	FLEB4 W12	Worker	B4	W12	Finland	Hyytiälä, Juupajoki	May 2017	Heikki Helanterä				QIagen
Sodalis-like (Hugann)	NO	YES				Formica lemani	FLEB4 W13	Worker	B4	W13	Finland	Hyytiälä, Juupajoki	May 2017	Heikki Helanterä				QIagen
Sodalis-like (Hugann)	NO	YES				Formica lemani	FLEB4 W14	Worker	B4	W14	Finland	Hyytiälä, Juupajoki	May 2017	Heikki Helanterä				QIagen
Sodalis-like (Hugann)	NO	YES				Formica lemani	FLEB4 W15	Worker	B4	W15	Finland	Hyytiälä, Juupajoki	May 2017	Heikki Helanterä				QIagen
Sodalis-like (Hugann)	NO	YES				Formica lemani	FLEB4 W16	Worker	B4	W16	Finland	Hyytiälä, Juupajoki	May 2017	Heikki Helanterä				QIagen
Sodalis-like (Hugann)	NO	YES				Formica lemani	FLEB4 W17	Worker	B4	W17	Finland	Hyytiälä, Juupajoki	May 2017	Heikki Helanterä				QIagen
Sodalis-like (Hugann)	NO	YES				Formica lemani	FLEB4 W18	Worker	B4	W18	Finland	Hyytiälä, Juupajoki	May 2017	Heikki Helanterä				QIagen
Sodalis-like (Hugann)	NO	YES				Formica lemani	FLEB4 W2	Worker	B4	W2	Finland	Hyytiälä, Juupajoki	May 2017	Heikki Helanterä				QIagen
Sodalis-like (Hugann)	NO	YES				Formica lemani	FLEB4 W3	Worker	B4	W3	Finland	Hyytiälä, Juupajoki	May 2017	Heikki Helanterä				QIagen
Sodalis-like (Hugann)	NO	YES				Formica lemani	FLEB4 W4	Worker	B4	W4	Finland	Hyytiälä, Juupajoki	May 2017	Heikki Helanterä				QIagen
Sodalis-like (Hugann)	NO	YES				Formica lemani	FLEB4 W5	Worker	B4	W5	Finland	Hyytiälä, Juupajoki	May 2017	Heikki Helanterä				QIagen
Sodalis-like (Hugann)	NO	YES				Formica lemani	FLEB4 W6	Worker	B4	W6	Finland	Hyytiälä, Juupajoki	May 2017	Heikki Helanterä				QIagen
Sodalis-like (Hugann)	NO	YES				Formica lemani	FLEB4 W7	Worker	B4	W7	Finland	Hyytiälä, Juupajoki	May 2017	Heikki Helanterä				QIagen
Sodalis-like (Hugann)	NO	YES				Formica lemani	FLEB4 W8	Worker	B4	W8	Finland	Hyytiälä, Juupajoki	May 2017	Heikki Helanterä				QIagen
Sodalis-like (Hugann)	NO	YES				Formica lemani	FLEB4 W9	Worker	B4	W9	Finland	Hyytiälä, Juupajoki	May 2017	Heikki Helanterä				QIagen
Sodalis-like (Hugann)	YES	YES*	YES			Formica lemani	FLEB5 Q1	Queen	B5	Q1	Finland	Hyytiälä, Juupajoki	May 2017	Heikki Helanterä	1_16S	582089	296844	QIagen
Sodalis-like (Hugann)	YES	YES*				Formica lemani	FLEB5 Q2	Queen	B5	Q2	Finland	Hyytiälä, Juupajoki	May 2017	Heikki Helanterä				QIagen
Sodalis-like (Hugann)	YES	YES*				Formica lemani	FLEB5 Q3	Queen	B5	Q3	Finland	Hyytiälä, Juupajoki	May 2017	Heikki Helanterä				QIagen
Sodalis-like (Hugann)	YES	YES*				Formica lemani	FLEB5 Q4	Queen	B5	Q4	Finland	Hyytiälä, Juupajoki	May 2017	Heikki Helanterä				QIagen
Sodalis-like (Hugann)	YES	YES*				Formica lemani	FLEB5 Q5	Queen	B5	Q5	Finland	Hyytiälä, Juupajoki	May 2017	Heikki Helanterä				QIagen
Sodalis-like (Hugann)	YES	YES				Formica lemani	FLEB5 W1	Worker	B5	W1	Finland	Hyytiälä, Juupajoki	May 2017	Heikki Helanterä				QIagen
Sodalis-like (Hugann)	YES	YES				Formica lemani	FLEB5 W10	Worker	B5	W10	Finland	Hyytiälä, Juupajoki	May 2017	Heikki Helanterä				QIagen
Sodalis-like (Hugann)	YES	YES				Formica lemani	FLEB5 W2	Worker	B5	W2	Finland	Hyytiälä, Juupajoki	May 2017	Heikki Helanterä				QIagen
Sodalis-like (Hugann)	YES	YES				Formica lemani	FLEB5 W3	Worker	B5	W3	Finland	Hyytiälä, Juupajoki	May 2017	Heikki Helanterä				QIagen
Sodalis-like (Hugann)	YES	YES				Formica lemani	FLEB5 W4	Worker	B5	W4	Finland	Hyytiälä, Juupajoki	May 2017	Heikki Helanterä				QIagen
Sodalis-like (Hugann)	YES	YES				Formica lemani	FLEB5 W5	Worker	B5	W5	Finland	Hyytiälä, Juupajoki	May 2017	Heikki Helanterä				QIagen
Sodalis-like (Hugann)	YES	YES				Formica lemani	FLEB5 W6	Worker	B5	W6	Finland	Hyytiälä, Juupajoki	May 2017	Heikki Helanterä				QIagen
Sodalis-like (Hugann)	YES	YES				Formica lemani	FLEB5 W7	Worker	B5	W7	Finland	Hyytiälä, Juupajoki	May 2017	Heikki Helanterä				QIagen
Sodalis-like (Hugann)	YES	YES				Formica lemani	FLEB5 W8	Worker	B5	W8	Finland	Hyytiälä, Juupajoki	May 2017	Heikki Helanterä				QIagen
Sodalis-like (Hugann)	YES	YES				Formica lemani	FLEB5 W9	Worker	B5	W9	Finland	Hyytiälä, Juupajoki	May 2017	Heikki Helanterä				QIagen
Sodalis-like (Hugann)	YES		YES			Formica lemani	FLEB6 Q	Queen	B6	Q	Finland	Hyytiälä, Juupajoki	May 2017	Heikki Helanterä	1_16S	630634	330184	Phenol
Sodalis-like (Hugann)	NO	YES				Formica lemani	FLEB6 W1	Worker	B6	W1	Finland	Hyytiälä, Juupajoki	May 2017	Heikki Helanterä				QIagen
Sodalis-like (Hugann)	NO	YES				Formica lemani	FLEB6 W10	Worker	B6	W10	Finland	Hyytiälä, Juupajoki	May 2017	Heikki Helanterä				QIagen
Sodalis-like (Hugann)	NO	YES				Formica lemani	FLEB6 W2	Worker	B6	W2	Finland	Hyytiälä, Juupajoki	May 2017	Heikki Helanterä				QIagen
Sodalis-like (Hugann)	NO	YES				Formica lemani	FLEB6 W3	Worker	B6	W3	Finland	Hyytiälä, Juupajoki	May 2017	Heikki Helanterä				QIagen
Sodalis-like (Hugann)	NO	YES				Formica lemani	FLEB6 W4	Worker	B6	W4	Finland	Hyytiälä, Juupajoki	May 2017	Heikki Helanterä				QIagen
Sodalis-like (Hugann)	NO	YES				Formica lemani	FLEB6 W5	Worker	B6	W5	Finland	Hyytiälä, Juupajoki	May 2017	Heikki Helanterä				QIagen
Sodalis-like (Hugann)	NO	YES				Formica lemani	FLEB6 W6	Worker	B6	W6	Finland	Hyytiälä, Juupajoki	May 2017	Heikki Helanterä				QIagen
Sodalis-like (Hugann)	NO	YES				Formica lemani	FLEB6 W7	Worker	B6	W7	Finland	Hyytiälä, Juupajoki	May 2017	Heikki Helanterä				QIagen
Sodalis-like (Hugann)	NO	YES				Formica lemani	FLEB6 W8	Worker	B6	W8	Finland	Hyytiälä, Juupajoki	May 2017	Heikki Helanterä				QIagen
Sodalis-like (Hugann)	NO	YES				Formica lemani	FLEB6 W9	Worker	B6	W9	Finland	Hyytiälä, Juupajoki	May 2017	Heikki Helanterä				QIagen
Sodalis-like (Hugann)	YES		YES			Formica lemani	FLEB9 Q	Queen	B9	Q	Finland	Hyytiälä, Juupajoki	May 2017	Heikki Helanterä	1_16S	102716	52371	Phenol
Sodalis-like (Hugann)	YES	YES				Formica lemani	FLEB9 W1	Worker	B9	W1	Finland	Hyytiälä, Juupajoki	May 2017	Heikki Helanterä				QIagen
Sodalis-like (Hugann)	YES	YES				Formica lemani	FLEB9 W10	Worker	B9	W10	Finland	Hyytiälä, Juupajoki	May 2017	Heikki Helanterä				QIagen
Sodalis-like (Hugann)	YES	YES				Formica lemani	FLEB9 W2	Worker	B9	W2	Finland	Hyytiälä, Juupajoki	May 2017	Heikki Helanterä				QIagen
Sodalis-like (Hugann)	YES	YES				Formica lemani	FLEB9 W3	Worker	B9	W3	Finland	Hyytiälä, Juupajoki	May 2017	Heikki Helanterä				QIagen
Sodalis-like (Hugann)	YES	YES				Formica lemani	FLEB9 W4	Worker	B9	W4	Finland	Hyytiälä, Juupajoki	May 2017	Heikki Helanterä				QIagen
Sodalis-like (Hugann)	YES	YES				Formica lemani	FLEB9 W5	Worker	B9	W5	Finland	Hyytiälä, Juupajoki	May 2017	Heikki Helanterä				QIagen
Sodalis-like (Hugann)	YES	YES				Formica lemani	FLEB9 W6	Worker	B9	W6	Finland	Hyytiälä, Juupajoki	May 2017	Heikki Helanterä				QIagen
Sodalis-like (Hugann)	YES	YES				Formica lemani	FLEB9 W7	Worker	B9	W7	Finland	Hyytiälä, Juupajoki	May 2017	Heikki Helanterä				QIagen
Sodalis-like (Hugann)	YES	YES				Formica lemani	FLEB9 W8	Worker	B9	W8	Finland	Hyytiälä, Juupajoki	May 2017	Heikki Helanterä				QIagen
Sodalis-like (Hugann)	YES	YES				Formica lemani	FLEB9 W9	Worker	B9	W9	Finland	Hyytiälä, Juupajoki	May 2017	Heikki Helanterä				QIagen
Sodalis-like (Hugann)	YES	YES				Formica lemani	FLED6 Q1	Queen	D6	Q1	Finland	Oulu	May 2017	Heikki Helanterä				QIagen
Sodalis-like (Hugann)	YES	YES				Formica lemani	FLED6 Q2	Queen	D6	Q2	Finland	Oulu	May 2017	Heikki Helanterä				QIagen
Sodalis-like (Hugann)	YES	YES				Formica lemani	FLED6 Q3	Queen	D6	Q3	Finland	Oulu	May 2017	Heikki Helanterä				QIagen
Sodalis-like (Hugann)	YES	YES				Formica lemani	FLED6 Q4	Queen	D6	Q4	Finland	Oulu	May 2017	Heikki Helanterä				QIagen
Sodalis-like (Hugann)	YES	YES				Formica lemani	FLED6 Q5	Queen	D6	Q5	Finland	Oulu	May 2017	Heikki Helanterä				QIagen
Sodalis-like (Hugann)	YES	YES				Formica lemani	FLED6 W1	Worker	D6	W1	Finland	Oulu	May 2017	Heikki Helanterä				QIagen
Sodalis-like (Hugann)	YES	YES				Formica lemani	FLED6 W10	Worker	D6	W10	Finland	Oulu	May 2017	Heikki Helanterä				QIagen
Sodalis-like (Hugann)	YES	YES				Formica lemani	FLED6 W2	Worker	D6	W2	Finland	Oulu	May 2017	Heikki Helanterä				QIagen
Sodalis-like (Hugann)	YES	YES				Formica lemani	FLED6 W3	Worker	D6	W3	Finland	Oulu	May 2017	Heikki Helanterä				QIagen
Sodalis-like (Hugann)	YES	YES				Formica lemani	FLED6 W4	Worker	D6	W4	Finland	Oulu	May 2017	Heikki Helanterä				QIagen
Sodalis-like (Hugann)	YES	YES				Formica lemani	FLED6 W5	Worker	D6	W5	Finland	Oulu	May 2017	Heikki Helanterä				QIagen
Sodalis-like (Hugann)	YES	YES				Formica lemani	FLED6 W6	Worker	D6	W6	Finland	Oulu	May 2017	Heikki Helanterä				QIagen
Sodalis-like (Hugann)	YES	YES				Formica lemani	FLED6 W7	Worker	D6	W7	Finland	Oulu	May 2017	Heikki Helanterä				QIagen
Sodalis-like (Hugann)	YES	YES				Formica lemani	FLED6 W8	Worker	D6	W8	Finland	Oulu	May 2017	Heikki Helanterä				QIagen
Sodalis-like (Hugann)	YES	YES				Formica lemani	FLED6 W9	Worker	D6	W9	Finland	Oulu	May 2017	Heikki Helanterä				QIagen
Sodalis-like (Hugann)	YES				YES	Formica lemani	FLEM-2-4	Queen			Finland			Heikki Helanterä				QIagen
Sodalis-like (Hugann)	YES	YES	YES			Formica lemani	Servi1 Q1	Queen	1	Q1	Finland	Muonio	July 2018	Heikki Helanterä	2_16S	314234	68512	QIagen
Sodalis-like (Hugann)	YES	YES				Formica lemani	Servi1 W1	Worker	1	W1	Finland	Muonio	July 2018	Heikki Helanterä				QIagen
Sodalis-like (Hugann)	YES	YES				Formica lemani	Servi12 W1	Worker	12	W1	Finland	Muonio	July 2018	Heikki Helanterä				QIagen
Sodalis-like (Hugann)	YES	YES	YES			Formica lemani	Servi13 Q1	Queen	13	Q1	Finland	Muonio	July 2018	Heikki Helanterä	2_16S	408594	86807	QIagen
Sodalis-like (Hugann)	YES	YES				Formica lemani	Servi13 W1	Worker	13	W1	Finland	Muonio	July 2018	Heikki Helanterä				QIagen
Sodalis-like (Hugann)	YES	YES	YES			Formica lemani	Servi14 Q1	Queen	14	Q1	Finland	Muonio	July 2018	Heikki Helanterä	2_16S	445572	99641	QIagen
Sodalis-like (Hugann)	YES	YES				Formica lemani	Servi14 W1	Worker	14	W1	Finland	Muonio	July 2018	Heikki Helanterä				QIagen
Sodalis-like (Hugann)	YES	YES	YES			Formica lemani	Servi15 Q1	Queen	15	Q1	Finland	Muonio	July 2018	Heikki Helanterä	2_16S	270085	62070	QIagen
Sodalis-like (Hugann)	YES	YES				Formica lemani	Servi15 W1	Worker	15	W1	Finland	Muonio	July 2018	Heikki Helanterä				QIagen
Sodalis-like (Hugann)	YES	YES	YES			Formica lemani	Servi2 Q1	Queen	2	Q1	Finland	Muonio	July 2018	Heikki Helanterä	2_16S	356304	88662	QIagen
Sodalis-like (Hugann)	YES	YES				Formica lemani	Servi2 Q2	Queen	2	Q2	Finland	Muonio	July 2018	Heikki Helanterä				QIagen
Sodalis-like (Hugann)	YES	YES				Formica lemani	Servi2 Q3	Queen	2	Q3	Finland	Muonio	July 2018	Heikki Helanterä				QIagen
Sodalis-like (Hugann)	YES	YES				Formica lemani	Servi2 W1	Worker	2	W1	Finland	Muonio	July 2018	Heikki Helanterä				QIagen
Sodalis-like (Hugann)	YES	YES				Formica lemani	Servi2 W2	Worker	2	W2	Finland	Muonio	July 2018	Heikki Helanterä				QIagen
Sodalis-like (Hugann)	YES	YES				Formica lemani	Servi2 W3	Worker	2	W3	Finland	Muonio	July 2018	Heikki Helanterä				QIagen
Sodalis-like (Hugann)	YES	YES				Formica lemani	Servi2 W4	Worker	2	W4	Finland	Muonio	July 2018	Heikki Helanterä				QIagen
Sodalis-like (Hugann)	YES	YES				Formica lemani	Servi2 W5	Worker	2	W5	Finland	Muonio	July 2018	Heikki Helanterä				QIagen
Sodalis-like (Hugann)	NO	YES				Formica lemani	Servi2 W6	Worker	2	W6	Finland	Muonio	July 2018	Heikki Helanterä				QIagen
Sodalis-like (Hugann)	YES	YES				Formica lemani	Servi2 W7	Worker	2	W7	Finland	Muonio	July 2018	Heikki Helanterä				QIagen
Sodalis-like (Hugann)	YES	YES				Formica lemani	Servi2 W8	Worker	2	W8	Finland	Muonio	July 2018	Heikki Helanterä				QIagen
Sodalis-like (Hugann)	YES	YES				Formica lemani	Servi2 W9	Worker	2	W9	Finland	Muonio	July 2018	Heikki Helanterä				QIagen
Sodalis-like (Hugann)	YES	YES*				Formica lemani	Servi25 Q1	Queen	25	Q1	Finland	Inari	July 2018	Heikki Helanterä				QIagen
Sodalis-like (Hugann)	YES	YES				Formica lemani	Servi25 Q2	Queen	25	Q2	Finland	Inari	July 2018	Heikki Helanterä				QIagen
Sodalis-like (Hugann)	YES	YES				Formica lemani	Servi25 Q3	Queen	25	Q3	Finland	Inari	July 2018	Heikki Helanterä				QIagen
Sodalis-like (Hugann)	YES	YES				Formica lemani	Servi25 Q4	Queen	25	Q4	Finland	Inari	July 2018	Heikki Helanterä				QIagen
Sodalis-like (Hugann)	YES	YES				Formica lemani	Servi25 W1	Worker	25	W1	Finland	Inari	July 2018	Heikki Helanterä				QIagen
Sodalis-like (Hugann)	YES	YES				Formica lemani	Servi25 W2	Worker	25	W2	Finland	Inari	July 2018	Heikki Helanterä				QIagen
Sodalis-like (Hugann)	YES	YES				Formica lemani	Servi25 W3	Worker	25	W3	Finland	Inari	July 2018	Heikki Helanterä				QIagen
Sodalis-like (Hugann)	YES	YES*				Formica lemani	Servi26 Q1	Queen	26	Q1	Finland	Inari	July 2018	Heikki Helanterä				QIagen
Sodalis-like (Hugann)	YES	YES				Formica lemani	Servi26 W1	Worker	26	W1	Finland	Inari	July 2018	Heikki Helanterä				QIagen
Sodalis-like (Hugann)	YES	YES*				Formica lemani	Servi3 Q1	Queen	3	Q1	Finland	Enontekiö	July 2018	Heikki Helanterä				QIagen
Sodalis-like (Hugann)	YES	YES				Formica lemani	Servi3 Q2	Queen	3	Q2	Finland	Enontekiö	July 2018	Heikki Helanterä				QIagen
Sodalis-like (Hugann)	YES	YES				Formica lemani	Servi3 Q3	Queen	3	Q3	Finland	Enontekiö	July 2018	Heikki Helanterä				QIagen
Sodalis-like (Hugann)	YES	YES				Formica lemani	Servi3 Q4	Queen	3	Q4	Finland	Enontekiö	July 2018	Heikki Helanterä				QIagen
Sodalis-like (Hugann)	YES	YES				Formica lemani	Servi3 Q5	Queen	3	Q5	Finland	Enontekiö	July 2018	Heikki Helanterä				QIagen
Sodalis-like (Hugann)	YES	YES				Formica lemani	Servi3 Q6	Queen	3	Q6	Finland	Enontekiö	July 2018	Heikki Helanterä				QIagen
Sodalis-like (Hugann)	YES	YES				Formica lemani	Servi3 W1	Worker	3	W1	Finland	Enontekiö	July 2018	Heikki Helanterä				QIagen
Sodalis-like (Hugann)	YES	YES				Formica lemani	Servi3 W2	Worker	3	W2	Finland	Enontekiö	July 2018	Heikki Helanterä				QIagen
Sodalis-like (Hugann)	YES	YES				Formica lemani	Servi3 W3	Worker	3	W3	Finland	Enontekiö	July 2018	Heikki Helanterä				QIagen
Sodalis-like (Hugann)	YES	YES				Formica lemani	Servi3 W4	Worker	3	W4	Finland	Enontekiö	July 2018	Heikki Helanterä				QIagen
Sodalis-like (Hugann)	YES	YES				Formica lemani	Servi3 W5	Worker	3	W5	Finland	Enontekiö	July 2018	Heikki Helanterä				QIagen
Sodalis-like (Hugann)	YES	YES				Formica lemani	Servi3 W6	Worker	3	W6	Finland	Enontekiö	July 2018	Heikki Helanterä				QIagen
Sodalis-like (Hugann)	NO		YES			Formica lugubris	8	Queen	8		England			Dominic Burns	1_16S	109751	53141	Phenol
Sodalis-like (Hugann)	NO		YES			Formica lugubris	17	Queen	17		England			Dominic Burns	1_16S	369889	146649	QIagen
Sodalis-like (Hugann)	NO		YES			Formica lugubris	19	Queen	19		England			Dominic Burns	1_16S	103654	48156	Phenol
Sodalis-like (Hugann)	NO	YES	YES			Formica picea	Servi18 Q1	Queen	18	Q1	Finland	Inari	July 2018	Heikki Helanterä	2_16S	265130	70016	QIagen
Sodalis-like (Hugann)	NO	YES				Formica picea	Servi18 W1	Worker	18	W1	Finland	Inari	July 2018	Heikki Helanterä				QIagen
Sodalis-like (Hugann)	NO	YES				Formica picea	Servi18 W2	Worker	18	W2	Finland	Inari	July 2018	Heikki Helanterä				QIagen
Sodalis-like (Hugann)	NO	YES				Formica picea	Servi18 W3	Worker	18	W3	Finland	Inari	July 2018	Heikki Helanterä				QIagen
Sodalis-like (Hugann)	NO	YES				Formica picea	Servi18 W4	Worker	18	W4	Finland	Inari	July 2018	Heikki Helanterä				QIagen
Sodalis-like (Hugann)	NO	YES				Formica picea	Servi18 W5	Worker	18	W5	Finland	Inari	July 2018	Heikki Helanterä				QIagen
Sodalis-like (Hugann)	NO	YES				Formica picea	Servi18 W6	Worker	18	W6	Finland	Inari	July 2018	Heikki Helanterä				QIagen
Sodalis-like (Hugann)	NO	YES	YES			Formica picea	Servi19 Q1	Queen	19	Q1	Finland	Inari	July 2018	Heikki Helanterä	2_16S	402817	114909	QIagen
Sodalis-like (Hugann)	NO	YES				Formica picea	Servi19 W1	Worker	19	W1	Finland	Inari	July 2018	Heikki Helanterä				QIagen
Sodalis-like (Hugann)	NO	YES				Formica picea	Servi19 W2	Worker	19	W2	Finland	Inari	July 2018	Heikki Helanterä				QIagen
Sodalis-like (Hugann)	NO	YES				Formica picea	Servi19 W3	Worker	19	W3	Finland	Inari	July 2018	Heikki Helanterä				QIagen
Sodalis-like (Hugann)	NO	YES				Formica picea	Servi19 W4	Worker	19	W4	Finland	Inari	July 2018	Heikki Helanterä				QIagen
Sodalis-like (Hugann)	NO	YES				Formica picea	Servi19 W5	Worker	19	W5	Finland	Inari	July 2018	Heikki Helanterä				QIagen
Sodalis-like (Hugann)	NO	YES				Formica picea	Servi19 W6	Worker	19	W6	Finland	Inari	July 2018	Heikki Helanterä				QIagen
Sodalis-like (Hugann)	NO	YES	YES			Formica picea	Servi20 Q1	Queen	20	Q1	Finland	Inari	July 2018	Heikki Helanterä	2_16S	292106	77220	QIagen
Sodalis-like (Hugann)	NO	YES				Formica picea	Servi20 W1	Worker	20	W1	Finland	Inari	July 2018	Heikki Helanterä				QIagen
Sodalis-like (Hugann)	NO	YES				Formica picea	Servi20 W2	Worker	20	W2	Finland	Inari	July 2018	Heikki Helanterä				QIagen
Sodalis-like (Hugann)	NO	YES				Formica picea	Servi20 W3	Worker	20	W3	Finland	Inari	July 2018	Heikki Helanterä				QIagen
Sodalis-like (Hugann)	NO	YES				Formica picea	Servi20 W4	Worker	20	W4	Finland	Inari	July 2018	Heikki Helanterä				QIagen
Sodalis-like (Hugann)	NO	YES				Formica picea	Servi20 W5	Worker	20	W5	Finland	Inari	July 2018	Heikki Helanterä				QIagen
Sodalis-like (Hugann)	NO	YES				Formica picea	Servi20 W6	Worker	20	W6	Finland	Inari	July 2018	Heikki Helanterä				QIagen
Sodalis-like (Hugann)	NO		YES			Formica pratensis	FPRA 106 Q	Queen	4		Finland	Koverhar, Hanko	May 2017	Heikki Helanterä	2_16S	343777	100223	QIagen
Sodalis-like (Hugann)	NO		YES			Formica pratensis	FPRA 56 Q	Queen	5		Finland	Koverhar, Hanko	May 2017	Heikki Helanterä	2_16S	297635	82781	QIagen
Sodalis-like (Hugann)	NO		YES			Formica pratensis	FPRA A12 Q	Queen	3		Finland	Koverhar, Hanko	May 2017	Heikki Helanterä	2_16S	265350	74598	QIagen
Sodalis-like (Hugann)	NO		YES			Formica pratensis	FPRA ROAD Q	Queen	1		Finland	Koverhar, Hanko	May 2017	Heikki Helanterä	2_16S	449217	122870	QIagen
Sodalis-like (Hugann)	NO		YES			Formica pratensis	FPRA X Q	Queen	2		Finland	Koverhar, Hanko	May 2017	Heikki Helanterä	2_16S	276903	78528	QIagen
Sodalis-like (Hugann)	NO		YES			Formica pratensis	FPRA106Q	Queen	106		Finland	Koverhar, Hanko	May 2017	Heikki Helanterä	1_16S	97547	54144	Phenol
Sodalis-like (Hugann)	NO		YES			Formica pratensis	FPRA12Q	Queen	12		Finland	Koverhar, Hanko	May 2017	Heikki Helanterä	1_16S	68086	31902	Phenol
Sodalis-like (Hugann)	NO		YES			Formica pratensis	FPRA19Q	Queen	19		Finland	Koverhar, Hanko	May 2017	Heikki Helanterä	1_16S	403194	241769	Phenol
Sodalis-like (Hugann)	NO		YES			Formica pratensis	FPRA56	Queen	56		Finland	Koverhar, Hanko	May 2017	Heikki Helanterä	1_16S	101774	40715	Phenol
Sodalis-like (Hugann)	NO		YES			Formica pratensis	FPRAROADQ	Queen	ROAD		Finland	Koverhar, Hanko	May 2017	Heikki Helanterä	1_16S	58742	26042	Phenol
Sodalis-like (Hugann)	NO		YES			Formica pratensis	FPRAXQ	Queen	X		Finland	Koverhar, Hanko	May 2017	Heikki Helanterä	1_16S	180788	83580	Phenol
Sodalis-like (Hugann)	NO		YES			Formica pressilabris	FPREM 203 Q	Queen	203		Finland	Raasepori	May 2017	Heikki Helanterä	2_16S	299558	71855	QIagen
Sodalis-like (Hugann)	NO		YES			Formica pressilabris	FPREM 451 Q	Queen	451		Finland	Raasepori	May 2017	Heikki Helanterä	2_16S	285302	64228	QIagen
Sodalis-like (Hugann)	NO		YES			Formica pressilabris	FPREM 539 Q	Queen	539		Finland	Raasepori	May 2017	Heikki Helanterä	2_16S	277071	65669	QIagen
Sodalis-like (Hugann)	NO		YES			Formica pressilabris	FPREM203Q	Queen	203		Finland	Raasepori	May 2017	Heikki Helanterä	1_16S	198573	108872	Phenol
Sodalis-like (Hugann)	NO		YES			Formica pressilabris	FPREM38Q	Queen	38		Finland	Raasepori	May 2017	Heikki Helanterä	1_16S	78897	35598	Phenol
Sodalis-like (Hugann)	NO		YES			Formica pressilabris	FPREM450Q	Queen	450		Finland	Raasepori	May 2017	Heikki Helanterä	1_16S	708740	288267	Phenol
Sodalis-like (Hugann)	NO		YES			Formica pressilabris	FPREM451Q	Queen	451		Finland	Raasepori	May 2017	Heikki Helanterä	1_16S	80048	35891	Phenol
Sodalis-like (Hugann)	NO		YES			Formica pressilabris	FPREM539Q	Queen	539		Finland	Raasepori	May 2017	Heikki Helanterä	1_16S	314604	182192	Phenol
Sodalis-like (Hugann)	NO		YES			Formica pressilabris	FPREM75Q	Queen	75		Finland	Raasepori	May 2017	Heikki Helanterä	1_16S	443240	166714	Phenol
Sodalis-like (Hugann)	NO	YES	YES			Formica rufibarbis	FRUFKAUPPA Q1	Queen	KAUPPA	Q1	Finland	Lappohja Hanko	May 2017	Heikki Helanterä	2_16S	267888	62520	QIagen
Sodalis-like (Hugann)	NO	YES	YES			Formica rufibarbis	FRUFKAUPPA Q2	Queen	KAUPPA	Q2	Finland	Lappohja Hanko	May 2017	Heikki Helanterä	2_16S	266328	65405	QIagen
Sodalis-like (Hugann)	NO	YES				Formica rufibarbis	FRUFKAUPPA W1	Worker	KAUPPA	W1	Finland	Lappohja Hanko	May 2017	Heikki Helanterä				QIagen
Sodalis-like (Hugann)	NO	YES				Formica rufibarbis	FRUFKAUPPA W10	Worker	KAUPPA	W10	Finland	Lappohja Hanko	May 2017	Heikki Helanterä				QIagen
Sodalis-like (Hugann)	NO	YES				Formica rufibarbis	FRUFKAUPPA W2	Worker	KAUPPA	W2	Finland	Lappohja Hanko	May 2017	Heikki Helanterä				QIagen
Sodalis-like (Hugann)	NO	YES				Formica rufibarbis	FRUFKAUPPA W3	Worker	KAUPPA	W3	Finland	Lappohja Hanko	May 2017	Heikki Helanterä				QIagen
Sodalis-like (Hugann)	NO	YES				Formica rufibarbis	FRUFKAUPPA W4	Worker	KAUPPA	W4	Finland	Lappohja Hanko	May 2017	Heikki Helanterä				QIagen
Sodalis-like (Hugann)	NO	YES				Formica rufibarbis	FRUFKAUPPA W5	Worker	KAUPPA	W5	Finland	Lappohja Hanko	May 2017	Heikki Helanterä				QIagen
Sodalis-like (Hugann)	NO	YES				Formica rufibarbis	FRUFKAUPPA W6	Worker	KAUPPA	W6	Finland	Lappohja Hanko	May 2017	Heikki Helanterä				QIagen
Sodalis-like (Hugann)	NO	YES				Formica rufibarbis	FRUFKAUPPA W7	Worker	KAUPPA	W7	Finland	Lappohja Hanko	May 2017	Heikki Helanterä				QIagen
Sodalis-like (Hugann)	NO	YES				Formica rufibarbis	FRUFKAUPPA W8	Worker	KAUPPA	W8	Finland	Lappohja Hanko	May 2017	Heikki Helanterä				QIagen
Sodalis-like (Hugann)	NO	YES				Formica rufibarbis	FRUFKAUPPA W9	Worker	KAUPPA	W9	Finland	Koverhar, Hanko	May 2017	Heikki Helanterä				QIagen
Sodalis-like (Hugann)	NO	YES	YES			Formica rufibarbis	FRUFKOFV1 Q1	Queen	KOFV1	Q1	Finland	Koverhar, Hanko	May 2017	Heikki Helanterä	2_16S	305807	72393	QIagen
Sodalis-like (Hugann)	NO	YES				Formica rufibarbis	FRUFKOFV1 Q2	Queen	KOFV1	Q2	Finland	Koverhar, Hanko	May 2017	Heikki Helanterä				QIagen
Sodalis-like (Hugann)	NO	YES	YES			Formica rufibarbis	FRUFKOFV1 Q3	Queen	KOFV1	Q3	Finland	Koverhar, Hanko	May 2017	Heikki Helanterä	2_16S	233464	55299	QIagen
Sodalis-like (Hugann)	NO	YES				Formica rufibarbis	FRUFKOFV1 W1	Worker	KOFV1	W1	Finland	Koverhar, Hanko	May 2017	Heikki Helanterä				QIagen
Sodalis-like (Hugann)	NO	YES				Formica rufibarbis	FRUFKOFV1 W2	Worker	KOFV1	W2	Finland	Koverhar, Hanko	May 2017	Heikki Helanterä				QIagen
Sodalis-like (Hugann)	NO	YES				Formica rufibarbis	FRUFKOFV1 W3	Worker	KOFV1	W3	Finland	Koverhar, Hanko	May 2017	Heikki Helanterä				QIagen
Sodalis-like (Hugann)	NO	YES				Formica rufibarbis	FRUFKOFV1 W4	Worker	KOFV1	W4	Finland	Koverhar, Hanko	May 2017	Heikki Helanterä				QIagen
Sodalis-like (Hugann)	NO	YES				Formica rufibarbis	FRUFKOFV1 W5	Worker	KOFV1	W5	Finland	Koverhar, Hanko	May 2017	Heikki Helanterä				QIagen
Sodalis-like (Hugann)	NO	YES				Formica rufibarbis	FRUFKOFV1 W6	Worker	KOFV1	W6	Finland	Koverhar, Hanko	May 2017	Heikki Helanterä				QIagen
Sodalis-like (Hugann)	NO	YES				Formica rufibarbis	FRUFKOFV1 W7	Worker	KOFV1	W7	Finland	Koverhar, Hanko	May 2017	Heikki Helanterä				QIagen
Sodalis-like (Hugann)	NO	YES				Formica rufibarbis	FRUFKOFV1 W8	Worker	KOFV1	W8	Finland	Koverhar, Hanko	May 2017	Heikki Helanterä				QIagen
Sodalis-like (Hugann)	NO	YES				Formica rufibarbis	FRUFKOFV1 W9	Worker	KOFV1	W9	Finland	Koverhar, Hanko	May 2017	Heikki Helanterä				QIagen
Sodalis-like (Hugann)	NO	YES	YES			Formica rufibarbis	FRUFKOFV2 Q1	Queen	KOFV2	Q1	Finland	Koverhar, Hanko	May 2017	Heikki Helanterä	2_16S	250972	55504	QIagen
Sodalis-like (Hugann)	NO	YES				Formica rufibarbis	FRUFKOFV2 Q2	Queen	KOFV2	Q2	Finland	Koverhar, Hanko	May 2017	Heikki Helanterä				QIagen
Sodalis-like (Hugann)	NO	YES				Formica rufibarbis	FRUFKOFV2 Q3	Queen	KOFV2	Q3	Finland	Koverhar, Hanko	May 2017	Heikki Helanterä				QIagen
Sodalis-like (Hugann)	NO	YES	YES			Formica rufibarbis	FRUFKOFV2 Q4	Queen	KOFV2	Q4	Finland	Koverhar, Hanko	May 2017	Heikki Helanterä	2_16S	267655	61043	QIagen
Sodalis-like (Hugann)	NO	YES				Formica rufibarbis	FRUFKOFV2 W1	Worker	KOFV2	W1	Finland	Koverhar, Hanko	May 2017	Heikki Helanterä				QIagen
Sodalis-like (Hugann)	NO	YES				Formica rufibarbis	FRUFKOFV2 W2	Worker	KOFV2	W2	Finland	Koverhar, Hanko	May 2017	Heikki Helanterä				QIagen
Sodalis-like (Hugann)	NO	YES				Formica rufibarbis	FRUFKOFV2 W3	Worker	KOFV2	W3	Finland	Koverhar, Hanko	May 2017	Heikki Helanterä				QIagen
Sodalis-like (Hugann)	NO	YES				Formica rufibarbis	FRUFKOFV2 W4	Worker	KOFV2	W4	Finland	Koverhar, Hanko	May 2017	Heikki Helanterä				QIagen
Sodalis-like (Hugann)	NO	YES				Formica rufibarbis	FRUFKOFV2 W5	Worker	KOFV2	W5	Finland	Koverhar, Hanko	May 2017	Heikki Helanterä				QIagen
Sodalis-like (Hugann)	NO	YES				Formica rufibarbis	FRUFKOFV2 W6	Worker	KOFV2	W6	Finland	Koverhar, Hanko	May 2017	Heikki Helanterä				QIagen
Sodalis-like (Hugann)	NO	YES				Formica rufibarbis	FRUFKOFV2 W7	Worker	KOFV2	W7	Finland	Koverhar, Hanko	May 2017	Heikki Helanterä				QIagen
Sodalis-like (Hugann)	NO	YES				Formica rufibarbis	FRUFKOFV2 W8	Worker	KOFV2	W8	Finland	Koverhar, Hanko	May 2017	Heikki Helanterä				QIagen
Sodalis-like (Hugann)	NO	YES				Formica rufibarbis	FRUFKOFV2 W9	Worker	KOFV2	W9	Finland	Koverhar, Hanko	May 2017	Heikki Helanterä				QIagen
Sodalis-like (Hugann)	NO	YES	YES			Formica rufibarbis	FRUFKOFV3 Q1	Queen	KOFV3	Q1	Finland	Koverhar, Hanko	May 2017	Heikki Helanterä	2_16S	342867	92219	QIagen
Sodalis-like (Hugann)	NO	YES				Formica rufibarbis	FRUFKOFV3 Q2	Queen	KOFV3	Q2	Finland	Koverhar, Hanko	May 2017	Heikki Helanterä				QIagen
Sodalis-like (Hugann)	NO	YES				Formica rufibarbis	FRUFKOFV3 Q3	Queen	KOFV3	Q3	Finland	Koverhar, Hanko	May 2017	Heikki Helanterä				QIagen
Sodalis-like (Hugann)	NO	YES	YES			Formica rufibarbis	FRUFKOFV3 Q4	Queen	KOFV3	Q4	Finland	Koverhar, Hanko	May 2017	Heikki Helanterä	2_16S	356900	90316	QIagen
Sodalis-like (Hugann)	NO	YES				Formica rufibarbis	FRUFKOFV3 W1	Worker	KOFV3	W1	Finland	Koverhar, Hanko	May 2017	Heikki Helanterä				QIagen
Sodalis-like (Hugann)	NO	YES				Formica rufibarbis	FRUFKOFV3 W10	Worker	KOFV3	W10	Finland	Koverhar, Hanko	May 2017	Heikki Helanterä				QIagen
Sodalis-like (Hugann)	NO	YES				Formica rufibarbis	FRUFKOFV3 W2	Worker	KOFV3	W2	Finland	Koverhar, Hanko	May 2017	Heikki Helanterä				QIagen
Sodalis-like (Hugann)	NO	YES				Formica rufibarbis	FRUFKOFV3 W3	Worker	KOFV3	W3	Finland	Koverhar, Hanko	May 2017	Heikki Helanterä				QIagen
Sodalis-like (Hugann)	NO	YES				Formica rufibarbis	FRUFKOFV3 W4	Worker	KOFV3	W4	Finland	Koverhar, Hanko	May 2017	Heikki Helanterä				QIagen
Sodalis-like (Hugann)	NO	YES				Formica rufibarbis	FRUFKOFV3 W5	Worker	KOFV3	W5	Finland	Koverhar, Hanko	May 2017	Heikki Helanterä				QIagen
Sodalis-like (Hugann)	NO	YES				Formica rufibarbis	FRUFKOFV3 W6	Worker	KOFV3	W6	Finland	Koverhar, Hanko	May 2017	Heikki Helanterä				QIagen
Sodalis-like (Hugann)	NO	YES				Formica rufibarbis	FRUFKOFV3 W7	Worker	KOFV3	W7	Finland	Koverhar, Hanko	May 2017	Heikki Helanterä				QIagen
Sodalis-like (Hugann)	NO	YES				Formica rufibarbis	FRUFKOFV3 W8	Worker	KOFV3	W8	Finland	Koverhar, Hanko	May 2017	Heikki Helanterä				QIagen
Sodalis-like (Hugann)	NO	YES				Formica rufibarbis	FRUFKOFV3 W9	Worker	KOFV3	W9	Finland	Koverhar, Hanko	May 2017	Heikki Helanterä				QIagen
Sodalis-like (Hugann)	NO	YES	YES			Formica rufibarbis	FRUFKOFV4 Q1	Queen	KOFV4	Q1	Finland	Koverhar, Hanko	May 2017	Heikki Helanterä	2_16S	245479	59080	QIagen
Sodalis-like (Hugann)	NO	YES				Formica rufibarbis	FRUFKOFV4 Q2	Queen	KOFV4	Q2	Finland	Koverhar, Hanko	May 2017	Heikki Helanterä				QIagen
Sodalis-like (Hugann)	NO	YES				Formica rufibarbis	FRUFKOFV4 Q3	Queen	KOFV4	Q3	Finland	Koverhar, Hanko	May 2017	Heikki Helanterä				QIagen
Sodalis-like (Hugann)	NO	YES	YES			Formica rufibarbis	FRUFKOFV4 Q4	Queen	KOFV4	Q4	Finland	Koverhar, Hanko	May 2017	Heikki Helanterä	2_16S	332670	74673	QIagen
Sodalis-like (Hugann)	NO	YES				Formica rufibarbis	FRUFKOFV4 W1	Worker	KOFV4	W1	Finland	Koverhar, Hanko	May 2017	Heikki Helanterä				QIagen
Sodalis-like (Hugann)	NO	YES				Formica rufibarbis	FRUFKOFV4 W10	Worker	KOFV4	W10	Finland	Koverhar, Hanko	May 2017	Heikki Helanterä				QIagen
Sodalis-like (Hugann)	NO	YES				Formica rufibarbis	FRUFKOFV4 W2	Worker	KOFV4	W2	Finland	Koverhar, Hanko	May 2017	Heikki Helanterä				QIagen
Sodalis-like (Hugann)	NO	YES				Formica rufibarbis	FRUFKOFV4 W3	Worker	KOFV4	W3	Finland	Koverhar, Hanko	May 2017	Heikki Helanterä				QIagen
Sodalis-like (Hugann)	NO	YES				Formica rufibarbis	FRUFKOFV4 W4	Worker	KOFV4	W4	Finland	Koverhar, Hanko	May 2017	Heikki Helanterä				QIagen
Sodalis-like (Hugann)	NO	YES				Formica rufibarbis	FRUFKOFV4 W5	Worker	KOFV4	W5	Finland	Koverhar, Hanko	May 2017	Heikki Helanterä				QIagen
Sodalis-like (Hugann)	NO	YES				Formica rufibarbis	FRUFKOFV4 W6	Worker	KOFV4	W6	Finland	Koverhar, Hanko	May 2017	Heikki Helanterä				QIagen
Sodalis-like (Hugann)	NO	YES				Formica rufibarbis	FRUFKOFV4 W7	Worker	KOFV4	W7	Finland	Koverhar, Hanko	May 2017	Heikki Helanterä				QIagen
Sodalis-like (Hugann)	NO	YES				Formica rufibarbis	FRUFKOFV4 W8	Worker	KOFV4	W8	Finland	Koverhar, Hanko	May 2017	Heikki Helanterä				QIagen
Sodalis-like (Hugann)	NO	YES				Formica rufibarbis	FRUFKOFV4 W9	Worker	KOFV4	W9	Finland	Koverhar, Hanko	May 2017	Heikki Helanterä				QIagen
Sodalis-like (Hugann)	NO	YES				Formica rufibarbis	FRUFNICK Q1	Worker	NICK	Q1	Finland	Koverhar, Hanko	May 2017	Heikki Helanterä				QIagen
Sodalis-like (Hugann)	NO	YES				Formica rufibarbis	FRUFNICK Q2	Worker	NICK	Q2	Finland	Koverhar, Hanko	May 2017	Heikki Helanterä				QIagen
Sodalis-like (Hugann)	NO	YES				Formica rufibarbis	FRUFNICK W1	Worker	NICK	W1	Finland	Koverhar, Hanko	May 2017	Heikki Helanterä				QIagen
Sodalis-like (Hugann)	NO	YES				Formica rufibarbis	FRUFNICK W10	Worker	NICK	W10	Finland	Koverhar, Hanko	May 2017	Heikki Helanterä				QIagen
Sodalis-like (Hugann)	NO	YES				Formica rufibarbis	FRUFNICK W2	Worker	NICK	W2	Finland	Koverhar, Hanko	May 2017	Heikki Helanterä				QIagen
Sodalis-like (Hugann)	NO	YES				Formica rufibarbis	FRUFNICK W3	Worker	NICK	W3	Finland	Koverhar, Hanko	May 2017	Heikki Helanterä				QIagen
Sodalis-like (Hugann)	NO	YES				Formica rufibarbis	FRUFNICK W4	Worker	NICK	W4	Finland	Koverhar, Hanko	May 2017	Heikki Helanterä				QIagen
Sodalis-like (Hugann)	NO	YES				Formica rufibarbis	FRUFNICK W5	Worker	NICK	W5	Finland	Koverhar, Hanko	May 2017	Heikki Helanterä				QIagen
Sodalis-like (Hugann)	NO	YES				Formica rufibarbis	FRUFNICK W6	Worker	NICK	W6	Finland	Koverhar, Hanko	May 2017	Heikki Helanterä				QIagen
Sodalis-like (Hugann)	NO	YES				Formica rufibarbis	FRUFNICK W7	Worker	NICK	W7	Finland	Koverhar, Hanko	May 2017	Heikki Helanterä				QIagen
Sodalis-like (Hugann)	NO	YES				Formica rufibarbis	FRUFNICK W8	Worker	NICK	W8	Finland	Koverhar, Hanko	May 2017	Heikki Helanterä				QIagen
Sodalis-like (Hugann)	NO	YES				Formica rufibarbis	FRUFNICK W9	Worker	NICK	W9	Finland	Koverhar, Hanko	May 2017	Heikki Helanterä				QIagen
Sodalis-like (Hugann)	NO		YES			Formica rufibarbis	ONLINERUFI	Queen			Purchased Online			antstore.net	1_16S	237292	132886	Phenol
Sodalis-like (Hugann)	NO	YES	YES	YES		Formica sanguinea	FSANKOVER Q1	Queen	KOVER	Q1	Finland	Koverhar, Hanko	May 2017	Heikki Helanterä	2_16S	260967	64238	QIagen
Sodalis-like (Hugann)	NO	YES				Formica sanguinea	FSANKOVER Q2	Queen	KOVER	Q2	Finland	Koverhar, Hanko	May 2017	Heikki Helanterä				QIagen
Sodalis-like (Hugann)	NO	YES				Formica sanguinea	FSANKOVER Q3	Queen	KOVER	Q3	Finland	Koverhar, Hanko	May 2017	Heikki Helanterä				QIagen
Sodalis-like (Hugann)	NO	YES				Formica sanguinea	FSANKOVER Q4	Queen	KOVER	Q4	Finland	Koverhar, Hanko	May 2017	Heikki Helanterä				QIagen
Sodalis-like (Hugann)	NO	YES	YES			Formica sanguinea	FSANKOVER Q5	Queen	KOVER	Q5	Finland	Koverhar, Hanko	May 2017	Heikki Helanterä	2_16S	335366	81114	QIagen
Sodalis-like (Hugann)	NO	YES				Formica sanguinea	FSANKOVER W1	Worker	KOVER	W1	Finland	Koverhar, Hanko	May 2017	Heikki Helanterä				QIagen
Sodalis-like (Hugann)	NO	YES				Formica sanguinea	FSANKOVER W10	Worker	KOVER	W10	Finland	Koverhar, Hanko	May 2017	Heikki Helanterä				QIagen
Sodalis-like (Hugann)	NO	YES				Formica sanguinea	FSANKOVER W2	Worker	KOVER	W2	Finland	Koverhar, Hanko	May 2017	Heikki Helanterä				QIagen
Sodalis-like (Hugann)	NO	YES				Formica sanguinea	FSANKOVER W3	Worker	KOVER	W3	Finland	Koverhar, Hanko	May 2017	Heikki Helanterä				QIagen
Sodalis-like (Hugann)	NO	YES				Formica sanguinea	FSANKOVER W4	Worker	KOVER	W4	Finland	Koverhar, Hanko	May 2017	Heikki Helanterä				QIagen
Sodalis-like (Hugann)	NO	YES				Formica sanguinea	FSANKOVER W5	Worker	KOVER	W5	Finland	Koverhar, Hanko	May 2017	Heikki Helanterä				QIagen
Sodalis-like (Hugann)	NO	YES				Formica sanguinea	FSANKOVER W6	Worker	KOVER	W6	Finland	Koverhar, Hanko	May 2017	Heikki Helanterä				QIagen
Sodalis-like (Hugann)	NO	YES				Formica sanguinea	FSANKOVER W7	Worker	KOVER	W7	Finland	Koverhar, Hanko	May 2017	Heikki Helanterä				QIagen
Sodalis-like (Hugann)	NO	YES				Formica sanguinea	FSANKOVER W8	Worker	KOVER	W8	Finland	Koverhar, Hanko	May 2017	Heikki Helanterä				QIagen
Sodalis-like (Hugann)	NO	YES				Formica sanguinea	FSANKOVER W9	Worker	KOVER	W9	Finland	Koverhar, Hanko	May 2017	Heikki Helanterä				QIagen
Sodalis-like (Hugann)	NO	YES	YES			Formica sanguinea	FSANNICK Q1	Queen	NICK	Q1	Finland	Koverhar, Hanko	May 2017	Heikki Helanterä	2_16S	351512	56140	QIagen
Sodalis-like (Hugann)	NO	YES				Formica sanguinea	FSANNICK Q2	Queen	NICK	Q2	Finland	Koverhar, Hanko	May 2017	Heikki Helanterä				QIagen
Sodalis-like (Hugann)	NO	YES				Formica sanguinea	FSANNICK Q3	Queen	NICK	Q3	Finland	Koverhar, Hanko	May 2017	Heikki Helanterä				QIagen
Sodalis-like (Hugann)	NO	YES				Formica sanguinea	FSANNICK Q4	Queen	NICK	Q4	Finland	Koverhar, Hanko	May 2017	Heikki Helanterä				QIagen
Sodalis-like (Hugann)	NO	YES				Formica sanguinea	FSANNICK Q5	Queen	NICK	Q5	Finland	Koverhar, Hanko	May 2017	Heikki Helanterä				QIagen
Sodalis-like (Hugann)	NO	YES				Formica sanguinea	FSANNICK Q6	Queen	NICK	Q6	Finland	Koverhar, Hanko	May 2017	Heikki Helanterä				QIagen
Sodalis-like (Hugann)	NO	YES	YES			Formica sanguinea	FSANNICK Q7	Queen	NICK	Q7	Finland	Koverhar, Hanko	May 2017	Heikki Helanterä	2_16S	378670	75974	QIagen
Sodalis-like (Hugann)	NO	YES				Formica sanguinea	FSANNICK W1	Worker	NICK	W1	Finland	Koverhar, Hanko	May 2017	Heikki Helanterä				QIagen
Sodalis-like (Hugann)	NO	YES				Formica sanguinea	FSANNICK W10	Worker	NICK	W10	Finland	Koverhar, Hanko	May 2017	Heikki Helanterä				QIagen
Sodalis-like (Hugann)	NO	YES				Formica sanguinea	FSANNICK W2	Worker	NICK	W2	Finland	Koverhar, Hanko	May 2017	Heikki Helanterä				QIagen
Sodalis-like (Hugann)	NO	YES				Formica sanguinea	FSANNICK W3	Worker	NICK	W3	Finland	Koverhar, Hanko	May 2017	Heikki Helanterä				QIagen
Sodalis-like (Hugann)	NO	YES				Formica sanguinea	FSANNICK W4	Worker	NICK	W4	Finland	Koverhar, Hanko	May 2017	Heikki Helanterä				QIagen
Sodalis-like (Hugann)	NO	YES				Formica sanguinea	FSANNICK W5	Worker	NICK	W5	Finland	Koverhar, Hanko	May 2017	Heikki Helanterä				QIagen
Sodalis-like (Hugann)	NO	YES				Formica sanguinea	FSANNICK W6	Worker	NICK	W6	Finland	Koverhar, Hanko	May 2017	Heikki Helanterä				QIagen
Sodalis-like (Hugann)	NO	YES				Formica sanguinea	FSANNICK W7	Worker	NICK	W7	Finland	Koverhar, Hanko	May 2017	Heikki Helanterä				QIagen
Sodalis-like (Hugann)	NO	YES				Formica sanguinea	FSANNICK W8	Worker	NICK	W8	Finland	Koverhar, Hanko	May 2017	Heikki Helanterä				QIagen
Sodalis-like (Hugann)	NO	YES				Formica sanguinea	FSANNICK W9	Worker	NICK	W9	Finland	Koverhar, Hanko	May 2017	Heikki Helanterä				QIagen
Sodalis-like (Hugann)	NO	YES	YES			Formica sanguinea	FSANNICK2 Q1	Queen	NICK2	Q1	Finland	Koverhar, Hanko	May 2017	Heikki Helanterä	2_16S	326004	69483	QIagen
Sodalis-like (Hugann)	NO	YES				Formica sanguinea	FSANNICK2 Q2	Queen	NICK2	Q2	Finland	Koverhar, Hanko	May 2017	Heikki Helanterä				QIagen
Sodalis-like (Hugann)	NO	YES				Formica sanguinea	FSANNICK2 Q3	Queen	NICK2	Q3	Finland	Koverhar, Hanko	May 2017	Heikki Helanterä				QIagen
Sodalis-like (Hugann)	NO	YES	YES			Formica sanguinea	FSANNICK2 Q4	Queen	NICK2	Q4	Finland	Koverhar, Hanko	May 2017	Heikki Helanterä	2_16S	593137	132122	QIagen
Sodalis-like (Hugann)	NO	YES				Formica sanguinea	FSANNICK2 W1	Worker	NICK2	W1	Finland	Koverhar, Hanko	May 2017	Heikki Helanterä				QIagen
Sodalis-like (Hugann)	NO	YES				Formica sanguinea	FSANNICK2 W10	Worker	NICK2	W10	Finland	Koverhar, Hanko	May 2017	Heikki Helanterä				QIagen
Sodalis-like (Hugann)	NO	YES				Formica sanguinea	FSANNICK2 W2	Worker	NICK2	W2	Finland	Koverhar, Hanko	May 2017	Heikki Helanterä				QIagen
Sodalis-like (Hugann)	NO	YES				Formica sanguinea	FSANNICK2 W3	Worker	NICK2	W3	Finland	Koverhar, Hanko	May 2017	Heikki Helanterä				QIagen
Sodalis-like (Hugann)	NO	YES				Formica sanguinea	FSANNICK2 W4	Worker	NICK2	W4	Finland	Koverhar, Hanko	May 2017	Heikki Helanterä				QIagen
Sodalis-like (Hugann)	NO	YES				Formica sanguinea	FSANNICK2 W5	Worker	NICK2	W5	Finland	Koverhar, Hanko	May 2017	Heikki Helanterä				QIagen
Sodalis-like (Hugann)	NO	YES				Formica sanguinea	FSANNICK2 W6	Worker	NICK2	W6	Finland	Koverhar, Hanko	May 2017	Heikki Helanterä				QIagen
Sodalis-like (Hugann)	NO	YES				Formica sanguinea	FSANNICK2 W7	Worker	NICK2	W7	Finland	Koverhar, Hanko	May 2017	Heikki Helanterä				QIagen
Sodalis-like (Hugann)	NO	YES				Formica sanguinea	FSANNICK2 W8	Worker	NICK2	W8	Finland	Koverhar, Hanko	May 2017	Heikki Helanterä				QIagen
Sodalis-like (Hugann)	NO	YES				Formica sanguinea	FSANNICK2 W9	Worker	NICK2	W9	Finland	Koverhar, Hanko	May 2017	Heikki Helanterä				QIagen
Sodalis-like (Hugann)	NO	YES	YES			Formica sanguinea	FSANOBY Q1	Queen	OBY	Q1	Finland	Öby, raasepori	May 2017	Heikki Helanterä	2_16S	291486	64815	QIagen
Sodalis-like (Hugann)	NO	YES				Formica sanguinea	FSANOBY Q2	Queen	OBY	Q2	Finland	Öby, raasepori	May 2017	Heikki Helanterä				QIagen
Sodalis-like (Hugann)	NO	YES				Formica sanguinea	FSANOBY Q3	Queen	OBY	Q3	Finland	Öby, raasepori	May 2017	Heikki Helanterä				QIagen
Sodalis-like (Hugann)	NO	YES	YES	YES		Formica sanguinea	FSANOBY Q4	Queen	OBY	Q4	Finland	Öby, raasepori	May 2017	Heikki Helanterä	2_16S	273174	61706	QIagen
Sodalis-like (Hugann)	NO	YES				Formica sanguinea	FSANOBY W1	Worker	OBY	W1	Finland	Öby, raasepori	May 2017	Heikki Helanterä				QIagen
Sodalis-like (Hugann)	NO	YES				Formica sanguinea	FSANOBY W2	Worker	OBY	W2	Finland	Öby, raasepori	May 2017	Heikki Helanterä				QIagen
Sodalis-like (Hugann)	NO	YES				Formica sanguinea	FSANOBY W3	Worker	OBY	W3	Finland	Öby, raasepori	May 2017	Heikki Helanterä				QIagen
Sodalis-like (Hugann)	NO	YES				Formica sanguinea	FSANOBY W4	Worker	OBY	W4	Finland	Öby, raasepori	May 2017	Heikki Helanterä				QIagen
Sodalis-like (Hugann)	NO	YES				Formica sanguinea	FSANOBY W5	Worker	OBY	W5	Finland	Öby, raasepori	May 2017	Heikki Helanterä				QIagen
Sodalis-like (Hugann)	NO	YES				Formica sanguinea	FSANOBY W6	Worker	OBY	W6	Finland	Öby, raasepori	May 2017	Heikki Helanterä				QIagen
Sodalis-like (Hugann)	NO	YES				Formica sanguinea	FSANOBY W7	Worker	OBY	W7	Finland	Öby, raasepori	May 2017	Heikki Helanterä				QIagen
Sodalis-like (Hugann)	NO	YES				Formica sanguinea	FSANOBY W8	Worker	OBY	W8	Finland	Öby, raasepori	May 2017	Heikki Helanterä				QIagen
Sodalis-like (Hugann)	NO	YES				Formica sanguinea	FSANOBY W9	Worker	OBY	W9	Finland	Öby, raasepori	May 2017	Heikki Helanterä				QIagen
Sodalis-like (Hugann)	NO	YES	YES			Formica sanguinea	FSANR1 Q1	Queen	RYSS1	Q1	Finland	Lappohja, Hanko	May 2017	Heikki Helanterä	2_16S	296719	81948	QIagen
Sodalis-like (Hugann)	NO	YES				Formica sanguinea	FSANR1 Q2	Queen	RYSS1	Q2	Finland	Lappohja, Hanko	May 2017	Heikki Helanterä				QIagen
Sodalis-like (Hugann)	NO	YES				Formica sanguinea	FSANR1 Q3	Queen	RYSS1	Q3	Finland	Lappohja, Hanko	May 2017	Heikki Helanterä				QIagen
Sodalis-like (Hugann)	NO	YES				Formica sanguinea	FSANR1 Q4	Queen	RYSS1	Q4	Finland	Lappohja, Hanko	May 2017	Heikki Helanterä				QIagen
Sodalis-like (Hugann)	NO	YES				Formica sanguinea	FSANR1 Q5	Queen	RYSS1	Q5	Finland	Lappohja, Hanko	May 2017	Heikki Helanterä				QIagen
Sodalis-like (Hugann)	NO	YES				Formica sanguinea	FSANR1 Q6	Queen	RYSS1	Q6	Finland	Lappohja, Hanko	May 2017	Heikki Helanterä				QIagen
Sodalis-like (Hugann)	NO	YES				Formica sanguinea	FSANR1 Q7	Queen	RYSS1	Q7	Finland	Lappohja, Hanko	May 2017	Heikki Helanterä				QIagen
Sodalis-like (Hugann)	NO	YES	YES			Formica sanguinea	FSANR1 Q8	Queen	RYSS1	Q8	Finland	Lappohja, Hanko	May 2017	Heikki Helanterä	2_16S	394591	88661	QIagen
Sodalis-like (Hugann)	NO	YES				Formica sanguinea	FSANR1 W1	Worker	RYSS1	W1	Finland	Lappohja, Hanko	May 2017	Heikki Helanterä				QIagen
Sodalis-like (Hugann)	NO	YES				Formica sanguinea	FSANR1 W10	Worker	RYSS1	W10	Finland	Lappohja, Hanko	May 2017	Heikki Helanterä				QIagen
Sodalis-like (Hugann)	NO	YES				Formica sanguinea	FSANR1 W2	Worker	RYSS1	W2	Finland	Lappohja, Hanko	May 2017	Heikki Helanterä				QIagen
Sodalis-like (Hugann)	NO	YES				Formica sanguinea	FSANR1 W3	Worker	RYSS1	W3	Finland	Lappohja, Hanko	May 2017	Heikki Helanterä				QIagen
Sodalis-like (Hugann)	NO	YES				Formica sanguinea	FSANR1 W4	Worker	RYSS1	W4	Finland	Lappohja, Hanko	May 2017	Heikki Helanterä				QIagen
Sodalis-like (Hugann)	NO	YES				Formica sanguinea	FSANR1 W5	Worker	RYSS1	W5	Finland	Lappohja, Hanko	May 2017	Heikki Helanterä				QIagen
Sodalis-like (Hugann)	NO	YES				Formica sanguinea	FSANR1 W6	Worker	RYSS1	W6	Finland	Lappohja, Hanko	May 2017	Heikki Helanterä				QIagen
Sodalis-like (Hugann)	NO	YES				Formica sanguinea	FSANR1 W7	Worker	RYSS1	W7	Finland	Lappohja, Hanko	May 2017	Heikki Helanterä				QIagen
Sodalis-like (Hugann)	NO	YES				Formica sanguinea	FSANR1 W8	Worker	RYSS1	W8	Finland	Lappohja, Hanko	May 2017	Heikki Helanterä				QIagen
Sodalis-like (Hugann)	NO	YES				Formica sanguinea	FSANR1 W9	Worker	RYSS1	W9	Finland	Lappohja, Hanko	May 2017	Heikki Helanterä				QIagen
Sodalis-like (Hugann)	YES				YES	Formica selysi	FSEL-2-6	Queen			Finland			Heikki Helanterä				QIagen
Sodalis-like (Hugann)	YES	YES				Formica selysi	Fsel DE186 Q3	Queen	DE186	Q3	Switzerland	Deborence	2016	Michel Chapuisat				QIagen
Sodalis-like (Hugann)	YES	YES				Formica selysi	Fsel DE209 Q3	Queen	DE209	Q3	Switzerland	Deborence	2016	Michel Chapuisat				QIagen
Sodalis-like (Hugann)	YES	YES				Formica selysi	Fsel DE220 Q10	Queen	DE220	Q10	Switzerland	Deborence	2016	Michel Chapuisat				QIagen
Sodalis-like (Hugann)	YES	YES				Formica selysi	Fsel DE220 Q6	Queen	DE220	Q6	Switzerland	Deborence	2016	Michel Chapuisat				QIagen
Sodalis-like (Hugann)	YES	YES				Formica selysi	Fsel DE220 Q7	Queen	DE220	Q7	Switzerland	Deborence	2016	Michel Chapuisat				QIagen
Sodalis-like (Hugann)	YES	YES				Formica selysi	Fsel DE220 Q8	Queen	DE220	Q8	Switzerland	Deborence	2016	Michel Chapuisat				QIagen
Sodalis-like (Hugann)	YES	YES				Formica selysi	Fsel DE220 Q9	Queen	DE220	Q9	Switzerland	Deborence	2016	Michel Chapuisat				QIagen
Sodalis-like (Hugann)	YES	YES	YES			Formica selysi	FSELDE181 Q1	Queen	DE181	Q1	Switzerland	Deborence	2016	Michel Chapuisat	2_16S	389740	88509	QIagen
Sodalis-like (Hugann)	YES	YES	YES			Formica selysi	FSELDE181 Q2	Queen	DE181	Q2	Switzerland	Deborence	2016	Michel Chapuisat	2_16S	493065	98516	QIagen
Sodalis-like (Hugann)	YES	YES				Formica selysi	FSELDE181 W1	Worker	DE181	W1	Switzerland	Deborence	2016	Michel Chapuisat				QIagen
Sodalis-like (Hugann)	YES	YES				Formica selysi	FSELDE181 W2	Worker	DE181	W2	Switzerland	Deborence	2016	Michel Chapuisat				QIagen
Sodalis-like (Hugann)	YES	YES				Formica selysi	FSELDE181 W3	Worker	DE181	W3	Switzerland	Deborence	2016	Michel Chapuisat				QIagen
Sodalis-like (Hugann)	YES	YES				Formica selysi	FSELDE181 W4	Worker	DE181	W4	Switzerland	Deborence	2016	Michel Chapuisat				QIagen
Sodalis-like (Hugann)	YES	YES				Formica selysi	FSELDE181 W5	Worker	DE181	W5	Switzerland	Deborence	2016	Michel Chapuisat				QIagen
Sodalis-like (Hugann)	NO	YES	YES	YES		Formica selysi	FSELDE182 Q1	Queen	DE182	Q1	Switzerland	Deborence	2016	Michel Chapuisat	2_16S	409973	72984	QIagen
Sodalis-like (Hugann)	NO	YES	YES	YES		Formica selysi	FSELDE182 Q2	Queen	DE182	Q2	Switzerland	Deborence	2016	Michel Chapuisat	2_16S	347971	62499	QIagen
Sodalis-like (Hugann)	NO	YES		YES		Formica selysi	FSELDE182 Q3	Queen	DE182	Q3	Switzerland	Deborence	2016	Michel Chapuisat				QIagen
Sodalis-like (Hugann)	NO	YES		YES		Formica selysi	FSELDE182 Q4	Queen	DE182	Q4	Switzerland	Deborence	2016	Michel Chapuisat				QIagen
Sodalis-like (Hugann)	NO	YES				Formica selysi	FSELDE182 W1	Worker	DE182	W1	Switzerland	Deborence	2016	Michel Chapuisat				QIagen
Sodalis-like (Hugann)	NO	YES				Formica selysi	FSELDE182 W2	Worker	DE182	W2	Switzerland	Deborence	2016	Michel Chapuisat				QIagen
Sodalis-like (Hugann)	NO	YES				Formica selysi	FSELDE182 W3	Worker	DE182	W3	Switzerland	Deborence	2016	Michel Chapuisat				QIagen
Sodalis-like (Hugann)	NO	YES				Formica selysi	FSELDE182 W4	Worker	DE182	W4	Switzerland	Deborence	2016	Michel Chapuisat				QIagen
Sodalis-like (Hugann)	NO	YES				Formica selysi	FSELDE182 W5	Worker	DE182	W5	Switzerland	Deborence	2016	Michel Chapuisat				QIagen
Sodalis-like (Hugann)	NO	YES				Formica selysi	FSELDE182 W6	Worker	DE182	W6	Switzerland	Deborence	2016	Michel Chapuisat				QIagen
Sodalis-like (Hugann)	NO	YES				Formica selysi	FSELDE182 W7	Worker	DE182	W7	Switzerland	Deborence	2016	Michel Chapuisat				QIagen
Sodalis-like (Hugann)	NO	YES				Formica selysi	FSELDE182 W8	Worker	DE182	W8	Switzerland	Deborence	2016	Michel Chapuisat				QIagen
Sodalis-like (Hugann)	YES	YES	YES			Formica selysi	FSELDE186 Q1	Queen	DE186	Q1	Switzerland	Deborence	2016	Michel Chapuisat	2_16S	411260	92564	QIagen
Sodalis-like (Hugann)	YES	YES	YES			Formica selysi	FSELDE186 Q2	Queen	DE186	Q2	Switzerland	Deborence	2016	Michel Chapuisat	2_16S	392178	85677	QIagen
Sodalis-like (Hugann)	NO	YES				Formica selysi	FSELDE186 W1	Worker	DE186	W1	Switzerland	Deborence	2016	Michel Chapuisat				QIagen
Sodalis-like (Hugann)	NO	YES				Formica selysi	FSELDE186 W2	Worker	DE186	W2	Switzerland	Deborence	2016	Michel Chapuisat				QIagen
Sodalis-like (Hugann)	NO	YES				Formica selysi	FSELDE186 W3	Worker	DE186	W3	Switzerland	Deborence	2016	Michel Chapuisat				QIagen
Sodalis-like (Hugann)	NO	YES				Formica selysi	FSELDE186 W4	Worker	DE186	W4	Switzerland	Deborence	2016	Michel Chapuisat				QIagen
Sodalis-like (Hugann)	YES	YES	YES			Formica selysi	FSELDE200 Q1	Queen	DE200	Q1	Switzerland	Deborence	2016	Michel Chapuisat	2_16S	213977	44022	QIagen
Sodalis-like (Hugann)	YES	YES*				Formica selysi	FSELDE200 Q2	Queen	DE200	Q2	Switzerland	Deborence	2016	Michel Chapuisat				QIagen
Sodalis-like (Hugann)	YES	YES*				Formica selysi	FSELDE200 Q5	Queen	DE200	Q5	Switzerland	Deborence	2016	Michel Chapuisat				QIagen
Sodalis-like (Hugann)	YES	YES	YES			Formica selysi	FSELDE203 Q1	Queen	DE203	Q1	Switzerland	Deborence	2016	Michel Chapuisat	2_16S	320617	70843	QIagen
Sodalis-like (Hugann)	YES	YES*				Formica selysi	FSELDE203 Q2	Queen	DE203	Q2	Switzerland	Deborence	2016	Michel Chapuisat				QIagen
Sodalis-like (Hugann)	YES	YES				Formica selysi	FSELDE203 W1	Worker	DE203	W1	Switzerland	Deborence	2016	Michel Chapuisat				QIagen
Sodalis-like (Hugann)	YES	YES				Formica selysi	FSELDE203 W2	Worker	DE203	W2	Switzerland	Deborence	2016	Michel Chapuisat				QIagen
Sodalis-like (Hugann)	YES	YES				Formica selysi	FSELDE203 W3	Worker	DE203	W3	Switzerland	Deborence	2016	Michel Chapuisat				QIagen
Sodalis-like (Hugann)	YES	YES				Formica selysi	FSELDE203 W4	Worker	DE203	W4	Switzerland	Deborence	2016	Michel Chapuisat				QIagen
Sodalis-like (Hugann)	YES	YES				Formica selysi	FSELDE203 W5	Worker	DE203	W5	Switzerland	Deborence	2016	Michel Chapuisat				QIagen
Sodalis-like (Hugann)	YES	YES				Formica selysi	FSELDE203 W6	Worker	DE203	W6	Switzerland	Deborence	2016	Michel Chapuisat				QIagen
Sodalis-like (Hugann)	YES	YES				Formica selysi	FSELDE203 W7	Worker	DE203	W7	Switzerland	Deborence	2016	Michel Chapuisat				QIagen
Sodalis-like (Hugann)	YES	YES				Formica selysi	FSELDE203 W8	Worker	DE203	W8	Switzerland	Deborence	2016	Michel Chapuisat				QIagen
Sodalis-like (Hugann)	YES	YES	YES			Formica selysi	FSELDE209 Q1	Queen	DE209	Q1	Switzerland	Deborence	2016	Michel Chapuisat	2_16S	490723	82855	QIagen
Sodalis-like (Hugann)	YES	YES*				Formica selysi	FSELDE209 Q2	Queen	DE209	Q2	Switzerland	Deborence	2016	Michel Chapuisat				QIagen
Sodalis-like (Hugann)	NO	YES				Formica selysi	FSELDE209 W1	Worker	DE209	W1	Switzerland	Deborence	2016	Michel Chapuisat				QIagen
Sodalis-like (Hugann)	NO	YES				Formica selysi	FSELDE209 W2	Worker	DE209	W2	Switzerland	Deborence	2016	Michel Chapuisat				QIagen
Sodalis-like (Hugann)	YES	YES				Formica selysi	FSELDE209 W3	Worker	DE209	W3	Switzerland	Deborence	2016	Michel Chapuisat				QIagen
Sodalis-like (Hugann)	NO	YES				Formica selysi	FSELDE209 W4	Worker	DE209	W4	Switzerland	Deborence	2016	Michel Chapuisat				QIagen
Sodalis-like (Hugann)	YES	YES	YES			Formica selysi	FSELDE211 Q1	Queen	DE211	Q1	Switzerland	Deborence	2016	Michel Chapuisat	2_16S	271072	59204	QIagen
Sodalis-like (Hugann)	YES	YES*				Formica selysi	FSELDE211 Q2	Queen	DE211	Q2	Switzerland	Deborence	2016	Michel Chapuisat				QIagen
Sodalis-like (Hugann)	YES	YES				Formica selysi	FSELDE211 W1	Worker	DE211	W1	Switzerland	Deborence	2016	Michel Chapuisat				QIagen
Sodalis-like (Hugann)	YES	YES*				Formica selysi	FSELDE212 Q1	Queen	DE212	Q1	Switzerland	Deborence	2016	Michel Chapuisat				QIagen
Sodalis-like (Hugann)	YES	YES				Formica selysi	FSELDE212 W2	Worker	DE212	W2	Switzerland	Deborence	2016	Michel Chapuisat				QIagen
Sodalis-like (Hugann)	YES	YES	YES			Formica selysi	FSELDE216 Q1	Queen	DE216	Q1	Switzerland	Deborence	2016	Michel Chapuisat	2_16S	433093	95636	QIagen
Sodalis-like (Hugann)	YES	YES*				Formica selysi	FSELDE216 Q2	Queen	DE216	Q2	Switzerland	Deborence	2016	Michel Chapuisat				QIagen
Sodalis-like (Hugann)	YES	YES				Formica selysi	FSELDE216 W1	Worker	DE216	W1	Switzerland	Deborence	2016	Michel Chapuisat				QIagen
Sodalis-like (Hugann)	YES	YES				Formica selysi	FSELDE216 W2	Worker	DE216	W2	Switzerland	Deborence	2016	Michel Chapuisat				QIagen
Sodalis-like (Hugann)	YES	YES				Formica selysi	FSELDE216 W3	Worker	DE216	W3	Switzerland	Deborence	2016	Michel Chapuisat				QIagen
Sodalis-like (Hugann)	YES	YES				Formica selysi	FSELDE216 W4	Worker	DE216	W4	Switzerland	Deborence	2016	Michel Chapuisat				QIagen
Sodalis-like (Hugann)	YES	YES*				Formica selysi	FSELDE220 Q1	Queen	DE220	Q1	Switzerland	Deborence	2016	Michel Chapuisat				QIagen
Sodalis-like (Hugann)	YES	YES*				Formica selysi	FSELDE220 Q2	Queen	DE220	Q2	Switzerland	Deborence	2016	Michel Chapuisat				QIagen
Sodalis-like (Hugann)	YES	YES*				Formica selysi	FSELDE220 Q3	Queen	DE220	Q3	Switzerland	Deborence	2016	Michel Chapuisat				QIagen
Sodalis-like (Hugann)	YES	YES*				Formica selysi	FSELDE220 Q4	Queen	DE220	Q4	Switzerland	Deborence	2016	Michel Chapuisat				QIagen
Sodalis-like (Hugann)	YES	YES*				Formica selysi	FSELDE220 Q5	Queen	DE220	Q5	Switzerland	Deborence	2016	Michel Chapuisat				QIagen
Sodalis-like (Hugann)	YES	YES				Formica selysi	FSELDE220 W1	Worker	DE220	W1	Switzerland	Deborence	2016	Michel Chapuisat				QIagen
Sodalis-like (Hugann)	NO	YES				Formica selysi	FSELDE220 W2	Worker	DE220	W2	Switzerland	Deborence	2016	Michel Chapuisat				QIagen
Sodalis-like (Hugann)	YES	YES				Formica selysi	FSELDE220 W3	Worker	DE220	W3	Switzerland	Deborence	2016	Michel Chapuisat				QIagen
Sodalis-like (Hugann)	YES	YES				Formica selysi	FSELDE220 W4	Worker	DE220	W4	Switzerland	Deborence	2016	Michel Chapuisat				QIagen
Sodalis-like (Hugann)	NO	YES				Formica selysi	FSELDE220 W5	Worker	DE220	W5	Switzerland	Deborence	2016	Michel Chapuisat				QIagen
Sodalis-like (Hugann)	NO	YES				Formica selysi	FSELDE220 W6	Worker	DE220	W6	Switzerland	Deborence	2016	Michel Chapuisat				QIagen
Sodalis-like (Hugann)	YES	YES*				Formica selysi	FSELDE222 Q1	Queen	DE222	Q1	Switzerland	Deborence	2016	Michel Chapuisat				QIagen
Sodalis-like (Hugann)	YES	YES*				Formica selysi	FSELDE222 Q3	Queen	DE222	Q3	Switzerland	Deborence	2016	Michel Chapuisat				QIagen
Sodalis-like (Hugann)	YES	YES*				Formica selysi	FSELDE222 Q4	Queen	DE222	Q4	Switzerland	Deborence	2016	Michel Chapuisat				QIagen
Sodalis-like (Hugann)	YES	YES				Formica selysi	FSELDE222 W1	Worker	DE222	W1	Switzerland	Deborence	2016	Michel Chapuisat				QIagen
Sodalis-like (Hugann)	YES	YES				Formica selysi	FSELDE222 W2	Worker	DE222	W2	Switzerland	Deborence	2016	Michel Chapuisat				QIagen
Sodalis-like (Hugann)	YES	YES				Formica selysi	FSELDE222 W3	Worker	DE222	W3	Switzerland	Deborence	2016	Michel Chapuisat				QIagen
Sodalis-like (Hugann)	YES	YES				Formica selysi	FSELDE222 W4	Worker	DE222	W4	Switzerland	Deborence	2016	Michel Chapuisat				QIagen
Sodalis-like (Hugann)	YES	YES	YES			Formica selysi	FSELDE234 Q1	Queen	DE234	Q1	Switzerland	Deborence	2016	Michel Chapuisat	2_16S	258334	56694	QIagen
Sodalis-like (Hugann)	YES	YES*				Formica selysi	FSELDE234 Q2	Queen	DE234	Q2	Switzerland	Deborence	2016	Michel Chapuisat				QIagen
Sodalis-like (Hugann)	YES	YES				Formica selysi	FSELDE234 W1	Worker	DE234	W1	Switzerland	Deborence	2016	Michel Chapuisat				QIagen
Sodalis-like (Hugann)	YES	YES				Formica selysi	FSELDE234 W2	Worker	DE234	W2	Switzerland	Deborence	2016	Michel Chapuisat				QIagen
Sodalis-like (Hugann)	YES	YES				Formica selysi	FSELDE234 W3	Worker	DE234	W3	Switzerland	Deborence	2016	Michel Chapuisat				QIagen
Sodalis-like (Hugann)	YES	YES*		YES		Formica selysi	FSELDE238 Q1	Queen	DE238	Q1	Switzerland	Deborence	2016	Michel Chapuisat				QIagen
Sodalis-like (Hugann)	YES	YES				Formica selysi	FSELDE238 W1	Worker	DE238	W1	Switzerland	Deborence	2016	Michel Chapuisat				QIagen
Sodalis-like (Hugann)	YES	YES				Formica selysi	FSELDE238 W2	Worker	DE238	W2	Switzerland	Deborence	2016	Michel Chapuisat				QIagen
Sodalis-like (Hugann)	YES	YES				Formica selysi	FSELDE238 W3	Worker	DE238	W3	Switzerland	Deborence	2016	Michel Chapuisat				QIagen
Sodalis-like (Hugann)	YES	YES				Formica selysi	FSELDE238 W4	Worker	DE238	W4	Switzerland	Deborence	2016	Michel Chapuisat				QIagen
Sodalis-like (Hugann)	NO		YES			Formica truncorum	FTK 2 Q	Queen	2		Finland	Kopparnäs, Inkoo	May 2017	Heikki Helanterä	2_16S	260453	67395	QIagen
Sodalis-like (Hugann)	NO		YES			Formica truncorum	FTK 3 Q	Queen	3		Finland	Kopparnäs, Inkoo	May 2017	Heikki Helanterä	2_16S	208755	55338	QIagen
Sodalis-like (Hugann)	NO		YES			Formica truncorum	FTK 6 Q	Queen	6		Finland	Kopparnäs, Inkoo	May 2017	Heikki Helanterä	2_16S	272807	76405	QIagen
Sodalis-like (Hugann)	NO		YES			Formica truncorum	FTK1Q	Queen	1		Finland	Kopparnäs, Inkoo	May 2017	Heikki Helanterä	1_16S	112700	59189	Phenol
Sodalis-like (Hugann)	NO		YES			Formica truncorum	FTK2Q	Queen	2		Finland	Kopparnäs, Inkoo	May 2017	Heikki Helanterä	1_16S	452139	252360	Phenol
Sodalis-like (Hugann)	NO		YES			Formica truncorum	FTK3Q	Queen	3		Finland	Kopparnäs, Inkoo	May 2017	Heikki Helanterä	1_16S	47617	21968	Phenol
Sodalis-like (Hugann)	NO		YES			Formica truncorum	FTK4Q	Queen	4		Finland	Kopparnäs, Inkoo	May 2017	Heikki Helanterä	1_16S	65103	27281	Phenol
Sodalis-like (Hugann)	NO		YES			Formica truncorum	FTK5Q	Queen	5		Finland	Kopparnäs, Inkoo	May 2017	Heikki Helanterä	1_16S	72473	28292	Phenol
Sodalis-like (Hugann)	NO		YES			Formica truncorum	FTK6Q	Queen	6		Finland	Kopparnäs, Inkoo	May 2017	Heikki Helanterä	1_16S	131775	71720	Phenol
Sodalis-like (Hugann)	NO		YES			Formica truncorum	FTTV1Q	Queen	1		Finland	Tvärminne, Hanko	May 2017	Heikki Helanterä	1_16S	219785	121580	Phenol
Sodalis-like (Jungenella)	YES	YES				Plagiolepis pygmae	Plag sp. W1	Worker	Plag sp.	W1	Purchased Online							QIagen
Sodalis-like (Jungenella)	YES	YES				Plagiolepis pygmae	Plag sp. W2	Worker	Plag sp.	W2	Purchased Online							QIagen
Sodalis-like (Jungenella)	YES				YES	Plagiolepis pygmae	PPY-2-1	Queen			Germany							QIagen
Sodalis-like (Jungenella)	YES	YES				Plagiolepis sp.	Plag t.	Worker	Plag t.		Online							QIagen
Sodalis-like (Jungenella)	YES				YES	Plagiolepis sp.	PPY-2-2	Queen			Purchased Online							QIagen

## Sheet: S4 - WGS OVERVIEW
															Final Symbiont Assembly Statistics
Sequencing Run	Sample ID	Species	Caste	Location	Symbiont of Interest	Extraction Method	Raw Reads	Reads (Post Filter)	Reads To Symbiont	# Contigs W	Basepairs W	# Contigs E	Basepairs E	Symbiont Present	Basepairs (Kbp)	GC%	Coverage	Contigs
Run 1	1	Cardiocondyla obscurior	Queen	Tenerife	Westeberhardia	Phenol	74532978	57228142	1169	2	1013	9	6094	NO	-	-	-	-
Run 1	2	Cardiocondyla argryrotricha	Queen	Philipines/Malyasia	Westeberhardia	Phenol	70772086	55234886	68	0	0	2	10093	NO	-	-	-	-
Run 1	3	Cardiocondyla elegans	Queen	France	Westeberhardia	Phenol	85451078	65674076	47	0	0	1	2549	NO	-	-	-	-
Run 1	4	Cardiocondyla venestula	Queen	Republic of South Africa	Westeberhardia	Phenol	73716796	58534996	104	0	0	1	3553	NO	-	-	-	-
Run 1	5	Cardiocondyla obscurior	Queen	Japan	Westeberhardia	Phenol	69928014	53665832	44300	190	491639	192	492314	YES	-	-	-	-
Run 1	7	Cardiocondyla wroughtonii	Queen	Japan	Westeberhardia	Phenol	70395088	54053162	198086	46	595259	46	595259	YES	0.525	24	56	60
Run 1	8	Cardiocondyla nuda/atalanta	Queen	Australia	Westeberhardia	Phenol	68559912	54073032	154	0	0	233	3051000	NO	-	-	-	-
Run 1	9	Cardiocondyla thoracia	Queen	Australia	Westeberhardia	Phenol	63792974	50352200	78	0	0	2	2794	NO	-	-	-	-
Run 2	1	Plagiolepis pygmaea	Queen	Germany	Sodalis-like symbiont (Jungenella)	QIagen	83739238	65216818	631439	-	-	18	1174037	YES	1.15	45	1424	7
Run 2	2	Plagiolepis sp.	Queen	Germany	Sodalis-like symbiont (Jungenella)	QIagen	78354122	63068144	607053	-	-	120	1282970	YES	1.15	45	1428	6
Run 2	3	Formica fusca	Queen	Finland	Sodalis-like symbiont (Hugann)	QIagen	65424638	53442102	71065	-	-	7	1401465	YES	1.38	41	280	1
Run 2	4	Formica lemani	Queen	Finland	Sodalis-like symbiont (Hugann)	QIagen	74776996	55872272	28200	-	-	4	1402209	YES	1.38	41	118	1
Run 2	5	Formica cinerea	Queen	Finland	Sodalis-like symbiont (Hugann)	QIagen	65340438	51820526	120	-	-	2	1173	NO	-	-	-	-
Run 2	6	Formica selysi	Queen	Finland	Sodalis-like symbiont (Hugann)	QIagen	80113028	63048820	23626	-	-	11	1403102	YES	1.37	41	97	1
Run 2	7	Cardiocondyla minutior	Queen	Japan	Westeberhardia	QIagen	54498214	39224126	24080	3	283959	146	609314	YES	0.448	22	230	3
Run 2	8	Cardiocondyla mauritanica	Queen	Spain	Westeberhardia	QIagen	66676642	47704832	63033	2	462388	18	478160	YES	0.462	26	729	2
Column Explanations
Sequencing Run	Which WGS sequencing run the samples was in
Sample ID	The ID of the sample within its sequencing run
Species	The species of the sample
Caste	The caste of the sample
Location	Location of sample collection
Symbiont of Interest	Symbiont of interest in the sample
Extraction Method	Method used for extraction
Raw Reads	Reads generated by each library
Reads (Post Filter)	Reads used for assembling after trimming and filtering
Reads to Symbiont	Reads matching symbiont proxy ( Sodalis or Cardiocondyla Obscuriror Westeberhardia) based on Kraken2 results
Raw Reads	Reads generated by each library
# Contigs W	Number of contigs in the first round (all reads) assembly that were attributed to Westeberhardia by the Blobtools pipeline
Basepairs W	Number of basepairs in the first round (all reads) assembly that were attributed to Westeberhardia by the Blobtools pipeline
# Contigs E	Number of contigs in the first round (all reads) assembly that were attributed to the family Enterobacterales by the Blobtools pipeline
Basepairs E	Number of basepairs in the first round (all reads) assembly that were attributed to the family Enterobacterales by the Blobtools pipeline
Symbiont Present	Whether the symbiont was established to be present or not, based on presence/absence of contigs identified as belonging to the focal symbiont species or family
Basepairs (Kbp)	The number of Kbp in the final symbiont assembly
GC%	GC percentage of the final symbiont assembly
Coverage	The mean coverage of the final symbiont assembly
Contigs	The number of contigs in the final symbiont assembly

## Sheet: S5 - COUNTS COLONY
Species summary
Clade	Species	Queens Screened	Percentage Queens Positive	Workers Screened	Percentage Workers Positive		Excludes Illumina Sequenced Samples
Argentea Group	Cardiocondyla argyrotricha	12	0	0
Argentea Group	Cardiocondyla latifrons	2	0	0
Argentea Group	Cardiocondyla microsecta	4	0	0
Argentea Group	Cardiocondyla thoracica	5	0	0
Coptoformica	Formica exsecta	10	0	0
Coptoformica	Formica pressilabris	9	0	0
Emeryi Group	Cardiocondyla emeryi	6	1	0
Formica S. Str	Formica aquilonia	12	0	0
Formica S. Str	Formica lugubris	3	0	0
Formica S. Str	Formica pratensis	11	0	0
Formica S. Str	Formica truncorum	10	0	0
Minutior Group	Cardiocondyla minutior	7	0.714286	0
Nuda Group	Cardiocondyla itsukii	15	0.933333	0
Nuda Group	Cardiocondyla mauritanica	11	0.818182	0
Nuda Group	Cardiocondyla nuda OR atalanta	4	1	0
Palearctric Clade	Cardiocondyla elegans	4	0	0
Palearctric Clade	Cardiocondyla koshewnikovi/sahlbergi	3	0	0
Raptiformica	Formica sanguinea	28	0	49	0
Serviformica (clade 1)	Formica cinerea	52	0.37	49	0.673469
Serviformica (clade 1)	Formica fusca	32	1	94	1
Serviformica (clade 1)	Formica lemani	44	0.931818	144	0.777778
Serviformica (clade 1)	Formica selysi	38	0.921053	52	0.653846
Serviformica (clade 2)	Formica cunicularia	1	0	0	#DIV/0!
Serviformica (clade 2)	Formica picea	3	0	18	0
Serviformica (clade 2)	Formica rufibarbis	18	0	60	0
Shuckardi Group	Cardiocondyla schuckardi	3	1	0
Shuckardi Group	Cardiocondyla venustula	3	0.666667	0
Wroughtonii Group	Cardiocondyla obscurior	15	1	0
Wroughtonii Group	Cardiocondyla wroughtonii	4	0.5	0
Colony data
Species	Colony ID	Queens Screened	Percentage Queens Positive	Workers Screened	Percentage Workers Positive
Cardiocondyla argyrotricha	CARGYROMAL123	2	0	0			*Species indicates that only recently emerged queens where sampled in this colony
Cardiocondyla argyrotricha	CARGYROMAL18	4	0	0
Cardiocondyla argyrotricha	2	6	0	0
Cardiocondyla elegans	3	4	0	0
Cardiocondyla emeryi	CEMERYIMAL54	3	1	0
Cardiocondyla emeryi	CEMERYIMAL71	3	1	0
Cardiocondyla itsukii	CITSUKIIHI34	1	1	0
Cardiocondyla itsukii	CITSUKII1B1	2	1	0
Cardiocondyla itsukii	CITSUKII4A	4	1	0
Cardiocondyla itsukii	CITSUKIIHI36	4	1	0
Cardiocondyla itsukii	CITSUKIIHI37	4	0.75	0
Cardiocondyla koshewnikovi/sahlbergi	CKOSHGEOII28	1	0	0
Cardiocondyla koshewnikovi/sahlbergi	CKOSHGEOII38	1	0	0
Cardiocondyla koshewnikovi/sahlbergi	CKOSHGEOII39	1	0	0
Cardiocondyla latifrons	CLATIFRONSMAL8	2	0	0
Cardiocondyla mauritanica	CMAURITCN14	1	0	0
Cardiocondyla mauritanica	CMAURIT#1	2	1	0
Cardiocondyla mauritanica	CMAURITCN4	4	1	0
Cardiocondyla mauritanica	CMAURITCN9	4	0.75	0
Cardiocondyla microsecta	CMICROSECTAMAL56	4	0	0
Cardiocondyla minutior	9	1	1	0
Cardiocondyla minutior	CMINUTORISHIGAKI	2	0.5	0
Cardiocondyla minutior	10	2	1
Cardiocondyla minutior	CMINUTOROKINAWA	2	0.5	0
Cardiocondyla nuda OR atalanta	8	4	1	0
Cardiocondyla obscurior	Japan	6	1	0
Cardiocondyla obscurior	Taiwan	6	1	0
Cardiocondyla obscurior	Tenerife	3	1	0
Cardiocondyla schuckardi	CSHUCKARDIM87	1	1	0
Cardiocondyla schuckardi	CSHUCKARDIM85	2	1	0
Cardiocondyla thoracica	5	5	0	0
Cardiocondyla venustula	4	3	0.666667	0
Cardiocondyla wroughtonii	7	4	0.5	0
Formica aquilonia	1	2	0	0
Formica aquilonia	2	2	0	0
Formica aquilonia	3	2	0	0
Formica aquilonia	4	2	0	0
Formica aquilonia	5	2	0	0
Formica aquilonia	6	2	0	0
Formica cinerea	1	9	0.777778	9	0.56
Formica cinerea	2	1	0	10	0.6
Formica cinerea	3	1	1	10	0.9
Formica cinerea	(Online)	1	1	10	0.7
Formica cinerea	BAR 18-17	1	0	0
Formica cinerea	BAR 7-17	1	0	0
Formica cinerea	x	1	0	10	0.6
Formica cinerea	BAR1-17	2	0	0
Formica cinerea	BAR2-17	2	0	0
Formica cinerea*	YMFC1	5	1	0
Formica cinerea*	YNFC1	5	0.8	0
Formica cinerea*	YSFC1	8	0	0
Formica cinerea*	YSFC2	6	0	0
Formica cinerea*	YSFC3	5	0.2	0
Formica cinerea*	YVFC1	4	0	0
Formica cunicularia	Unknown	1	0	0
Formica exsecta	2	1	0	0
Formica exsecta	3	1	0	0
Formica exsecta	1	2	0	0
Formica exsecta	4	2	0	0
Formica exsecta	5	2	0	0
Formica exsecta	6	2	0	0
Formica fusca	3	1	1	0
Formica fusca	8	1	1	0
Formica fusca	A	0	#DIV/0!	10	1
Formica fusca	A3	0	#DIV/0!	10	1
Formica fusca	B10	1	1	10	1
Formica fusca	D	0	#DIV/0!	10	1
Formica fusca	E	0	#DIV/0!	10	1
Formica fusca	German sample	1	1	0
Formica fusca	B	3	1	10	1
Formica fusca	B8	10	1	15	1
Formica fusca	C	11	1	9	1
Formica fusca	F	4	1	10	1
Formica lemani	A1	1	1	10	1
Formica lemani	A2	1	1	10	1
Formica lemani	B1	1	1	10	1
Formica lemani	B11	1	1	10	0.7
Formica lemani	B3	2	1	12	1
Formica lemani	B6	1	1	10	0
Formica lemani	B9	1	1	10	1
Formica lemani	B2	4	1	10	1
Formica lemani	B4	4	0.25	18	0
Formica lemani	B5	5	1	10	1
Formica lemani	D6	5	1	10	1
Formica lemani *	1	1	1	1	1
Formica lemani	2	3	1	9	0.89
Formica lemani	3	6	1	6	1
Formica lemani	12	0	#DIV/0!	1	1
Formica lemani *	13	1	1	1	1
Formica lemani *	14	1	1	1	1
Formica lemani *	15	1	1	1	1
Formica lemani	25	4	1	3	1
Formica lemani	26	1	1	1	1
Formica lugubris	8	1	0	0
Formica lugubris	17	1	0	0
Formica lugubris	19	1	0	0
Formica picea	18	1	0	6	0
Formica picea	19	1	0	6	0
Formica picea	20	1	0	6	0
Formica pratensis	1	1	0	0
Formica pratensis	2	1	0	0
Formica pratensis	3	1	0	0
Formica pratensis	4	1	0	0
Formica pratensis	5	1	0	0
Formica pratensis	12	1	0	0
Formica pratensis	19	1	0	0
Formica pratensis	56	1	0	0
Formica pratensis	106	1	0	0
Formica pratensis	ROAD	1	0	0
Formica pratensis	X	1	0	0
Formica pressilabris	38	1	0	0
Formica pressilabris	75	1	0	0
Formica pressilabris	450	1	0	0
Formica pressilabris	203	2	0	0
Formica pressilabris	451	2	0	0
Formica pressilabris	539	2	0	0
Formica rufibarbis	NICK	0	#DIV/0!	12	0
Formica rufibarbis	Unknown	1	0	0
Formica rufibarbis	KAUPPA	2	0	10	0
Formica rufibarbis	KOFV1	3	0	9	0
Formica rufibarbis	KOFV2	4	0	9	0
Formica rufibarbis	KOFV3	4	0	10	0
Formica rufibarbis	KOFV4	4	0	10	0
Formica sanguinea	KOVER	5	0	10	0
Formica sanguinea	NICK	7	0	10	0
Formica sanguinea	NICK2	4	0	10	0
Formica sanguinea	OBY	4	0	9	0
Formica sanguinea	RYSS1	8	0	10	0
Formica selysi	DE212	1	1	1	1
Formica selysi	DE238	1	1	4	1
Formica selysi	DE181	2	1	5	1
Formica selysi	DE182	4	0	8	0
Formica selysi	DE186	3	1	4	0
Formica selysi	DE200	3	1	0
Formica selysi	DE203	2	1	8	1
Formica selysi	DE209	3	1	4	0.25
Formica selysi	DE211	2	1	1	1
Formica selysi	DE216	2	1	4	1
Formica selysi	DE220	10	1	6	0.5
Formica selysi	DE222	3	1	4	1
Formica selysi	DE234	2	1	3	1
Formica truncorum	4	1	0	0
Formica truncorum	5	1	0	0
Formica truncorum	1	2	0	0
Formica truncorum	2	2	0	0
Formica truncorum	3	2	0	0
Formica truncorum	6	2	0	0

## Sheet: S6 - PRIMERS
	Primer pairs used in 16S and ITS runs
	16S V4 original	515F_Caporaso	GTGCCAGCMGCCGCGGTAA	(Caporaso et al., 2011)
		806R_Caporaso	GGACTACHVGGGTWTCTAAT	(Caporaso et al., 2011)
	ITS5-5.8S	ITS5	GGAAGTAAAAGTCGTAACAAGG	(Epp et al., 2012)
		5.8S_fungi	CAAGAGATCCGTTGTTGAAAGTT	(Epp et al., 2012)
	Primers used in Sanger sequencing
	COXI Species Check	Jerry	CAACATTTATTTTGATTTTTTGG
		Ben degenerate	GCWACWACRTAATAKGTATCATG
	Sodalis 16S Diagnostic	Sodalis 16S diagnostic F2	GACGGAGGGTGCAAGC
		Sodalis 16S diagnostic R2	CGCTACACCTGAAATTCTACCC
	WeBh2 Diagnostic	WeBh2_F diagnostic	AATTACTGGGCGTAAAGRGTACG
		WeBh2_R diagnostic	TTCAYCCAGGGAGTCGTCTTC
	Primers Used For Westeberhardia Symbiont Phylogeny
	16S	16S_Webh_F2deg	GGA AAC GRT AGC TAA TAC CAC
		16S_Webh_R5	GGG CCA TGA TGA CTT GAC
		WeBh_16S188_F3	ACT AGA GTT TCA TAG AGG RGA G
		WeBh_16S980_R1	TAT TCA CCG TGG CAT TCT G
	CvrA	WeBh_CvrA92_F	AGT TCW TTA TCT TCY CGY TTA GG
		WeBh_CvrA494_F	GGA AGT AAT GAT CCA ATG GC
		WeBh_CvrA1013_R	GCT CCR CGT AAA CCW ACC C
		WeBh_CvrA1196_R	CCA TDC CAA AWC GAA AAA TAG GAG
	groL	WeBh_groL233_F	CAA ATG GTV AAA GAA GTT GC
		WeBh_groL257_F	TCAAAAGCWAATGAYACTGCTGG
		WeBg_groL1216_R	GCT ACT ACT CCT TCT TCT ACW GC
		WeBh_groL1473_R	CTT TAG TWG GAT CTA ARA TAC CC

## Sheet: S7 - Formica OTU Table
	17	ONLINE	8	19	FA1Q	FA3Q	FA6Q	FA2Q	FA4Q	FEOBY2Q	FEOBY3Q	FEOBY4Q	FEOBY1Q	FEOBY5Q	FLEA1 Q	FLEB9	FLEA2 Q	FLEB3 Q	FLEB6 Q	FLEB5 Q1	FLEB1 Q	FLEB2 Q	FLEB4 Q	FLEB11 Q	FPRA106Q	FPRAROADQ	FPRAXQ	FPRA56	FPRA12Q	FPREM75Q	FPREM450Q	FPREM203Q	FPREM539Q	FPREM451Q	FTK3Q	FTK5Q	FTTV1Q	FTK4Q	FFA3Q	ONLINEFUS	FFB8Q	ONLINERUFI	ONLINECUNI	FTK2Q	FEOBY6Q	FPREM38Q	FPRA19Q	FA5Q	FTK6Q
Otu00001	0	0.792562	0	0	0	0	0	0	0	0	0	0	0	0	0.781784	0.630521	0.541346	0.0167071	0.699274	0.652373	0.908796	0.759176	0	0.680819	0	0	0	0	0	0	0	0	0	0	0	0	0	0	0.749229	0.713029	0.721159	0	0	0	0	0	0	0	0
Otu00002	0.516621	0	0.859487	0	0	0.761181	0.729813	0	0.598991	0.23901	0.287997	0.338493	0.266445	0.255956	0.202589	0.0598805	0.0771629	0.0861396	0.0966582	0.0766396	0.0193335	0.0937582	0.240506	0.0883359	0.907321	0	0.869191	0	0.975456	0	0	0	0	0	0	0	0	0	0.202465	0.154448	0.0653926	0.252246	0.177316	0	0.290842	0	0.949617	0	0
Otu00003	0	0	0	0	0.731839	0	0	0.760267	0	0	0	0	0	0	0	0	0	0	0	0	0	0	0	0	0	0.964634	0	0.981604	0	0.446729	0.501889	0.424783	0.441644	0.473294	0.764248	0.847307	0.862551	0.830615	0	0	0	0	0	0.82645	0	0.318473	0	0.619615	0.931762
Otu00004	0	0	0	0	0	0	0	0	0	0	0	0	0	0	0	0.254263	0.304338	0.436057	0.121372	0.175978	0	0.105316	0.656786	0.181219	0	0	0	0	0	0	0	0	0	0	0	0	0	0	0	0	0	0.554754	0.621485	0	0	0	0	0	0
Otu00005	0	0.0124534	0	0	0	0	0	0	0	0	0	0	0	0	0.0114958	0	0	0.321102	0.0470162	0.0251041	0.0464782	0	0.0309245	0	0	0	0	0	0	0	0	0	0	0	0	0	0	0	0	0	0.122944	0	0	0	0	0	0	0	0
Otu00006	0	0	0	0	0.0253363	0.0697518	0.0280389	0	0.236116	0.130602	0.104324	0.0677409	0.134971	0.09883	0	0	0.012972	0	0	0	0	0	0	0	0	0	0.118031	0	0	0.132424	0.0285048	0.0583346	0	0.126327	0.131555	0.0584971	0.0144267	0.120377	0.0314085	0	0	0	0	0.112098	0.161524	0.308304	0	0.205614	0.0406163
Otu00007	0	0	0	0	0	0	0	0	0	0.403898	0.350373	0.408557	0.510949	0.417133	0	0	0	0	0	0	0	0	0	0	0	0	0	0	0	0	0	0	0	0	0	0	0	0	0	0	0	0	0	0	0.341684	0	0	0	0
Otu00008	0	0	0	0	0	0	0	0	0	0	0	0	0	0	0	0	0	0	0	0	0	0	0	0	0	0	0	0	0	0.250561	0.380238	0.254271	0.292247	0.283804	0	0	0	0	0	0	0	0	0	0	0	0.252936	0	0	0
Otu00009	0	0.0399534	0	0	0	0	0	0	0	0	0	0	0	0	0	0	0	0.0178957	0	0	0	0	0	0	0	0	0	0	0	0	0	0	0	0	0	0	0	0	0	0	0	0	0	0	0	0	0	0	0
Otu00010	0	0.0883318	0	0	0.0495964	0.0944158	0.021075	0.0248746	0.0353517	0	0.0159307	0.0425455	0	0.0248987	0	0.0125642	0	0.0538425	0	0	0	0	0	0	0	0	0	0	0	0.0301774	0	0.0133092	0.0380642	0.0137918	0.0254916	0.0130426	0.0833361	0.0170815	0	0	0.0752556	0	0	0.0405294	0.0665623	0.057728	0	0	0.0190045
Otu00011	0	0	0	0	0	0	0	0	0	0	0	0	0	0	0	0	0	0	0	0	0	0	0	0	0	0	0	0	0	0	0	0	0	0	0	0	0	0	0	0	0	0	0	0	0	0	0	0	0
Otu00012	0	0	0	0	0.0362332	0.0445342	0.121118	0.148045	0.0961774	0.11775	0.129529	0.0423946	0.0179641	0.116348	0	0	0	0	0	0	0	0	0	0	0	0	0	0	0	0.0510635	0	0.202412	0.160281	0	0.0485251	0.061148	0.0188682	0.0185477	0	0	0	0	0	0	0.0430444	0	0	0.138342	0
Otu00013	0	0	0	0	0	0	0	0	0	0	0	0	0	0	0	0	0	0	0	0	0	0	0	0	0	0	0	0	0	0	0	0	0	0	0	0	0	0	0	0.0307231	0	0	0	0	0	0	0	0	0
Otu00014	0	0	0	0	0	0	0	0	0	0	0	0	0	0	0	0	0	0	0	0	0	0	0	0	0	0	0	0	0	0	0	0	0	0	0	0	0	0	0	0	0	0	0	0	0	0	0	0	0
Otu00015	0	0	0	0	0	0	0	0	0	0	0	0	0	0	0	0	0	0	0	0	0	0	0	0	0	0	0	0	0	0	0	0	0	0	0	0	0	0	0	0	0	0	0	0	0	0	0	0	0
Otu00016	0	0	0	0	0	0	0	0	0	0	0	0	0	0	0	0	0	0	0	0	0	0	0	0	0	0	0	0	0	0	0	0	0	0	0	0	0	0	0	0.0756664	0	0	0	0	0	0	0	0	0
Otu00017	0	0	0	0	0	0	0	0	0	0	0	0	0	0	0	0	0	0	0	0	0	0	0	0	0	0	0	0	0	0	0	0	0	0	0	0	0	0	0	0	0	0	0	0	0	0	0	0	0
Otu00018	0	0	0	0	0	0	0	0	0	0	0	0	0	0	0	0	0	0	0	0	0	0	0	0	0	0	0	0	0	0	0	0	0	0.0205623	0	0	0	0	0	0	0	0.0134627	0.0160781	0	0	0	0	0	0
Otu00019	0	0	0	0	0	0	0	0	0	0	0	0	0	0	0	0	0	0	0	0	0	0	0	0	0	0	0	0	0	0	0	0	0	0	0	0	0	0	0	0	0	0.0422994	0	0	0	0	0	0	0
Otu00020	0	0	0	0	0	0	0	0	0	0.0301608	0.0313278	0.0272774	0.0210236	0.0276117	0	0.0147219	0.0215883	0.0225954	0.012387	0.0205697	0	0.0139668	0.0240346	0.0167332	0	0	0	0	0	0	0	0	0	0	0	0	0	0	0	0	0	0.0370769	0.0290431	0	0.02711	0	0	0	0
Otu00021	0	0	0	0	0	0	0	0	0	0	0	0	0	0	0	0	0	0	0	0	0	0	0	0	0	0	0	0	0	0	0	0	0	0	0	0	0	0	0	0	0	0	0	0	0	0	0	0	0
Otu00022	0	0	0	0	0	0	0	0	0	0	0	0	0	0	0	0	0	0	0	0	0	0	0	0	0	0	0	0	0	0	0	0	0	0	0	0	0	0	0	0	0	0	0	0	0	0	0	0	0
Otu00023	0	0	0	0	0	0	0	0	0	0	0	0	0	0	0	0	0	0	0	0	0	0	0	0	0	0	0	0	0	0	0	0	0	0	0	0	0	0	0	0	0	0	0	0	0	0	0	0	0
Otu00024	0	0	0	0	0	0	0	0	0	0	0	0	0	0	0	0	0	0	0	0	0	0	0	0	0	0	0	0	0	0	0	0	0	0	0	0	0	0	0	0	0	0	0	0	0	0	0	0	0
Otu00025	0	0	0	0	0	0	0	0	0	0	0	0	0	0	0	0.0174142	0.0257122	0.0265096	0.0137105	0.0234905	0	0.0150585	0.0336485	0.019744	0	0	0	0	0	0	0	0	0	0	0	0	0	0	0	0	0	0.0412835	0.030828	0	0	0	0	0	0
Otu00026	0.214512	0	0.0178582	0	0	0	0	0	0	0	0	0	0	0	0	0	0	0	0	0	0	0	0	0	0	0	0	0	0	0	0	0	0	0	0	0	0	0	0	0	0	0	0	0	0	0	0	0	0
Otu00027	0	0	0	0	0.0309417	0	0.0690805	0.015074	0	0.0109546	0	0.0153888	0	0	0	0	0	0	0	0	0	0	0	0	0	0	0	0	0	0	0	0	0	0	0	0	0	0	0	0	0	0	0	0	0.0106844	0	0	0	0
Otu00028	0	0	0	0.557189	0	0	0	0	0	0	0	0	0	0	0	0	0	0	0	0	0	0	0	0	0	0	0	0	0	0	0	0	0	0	0	0	0	0	0	0	0	0	0	0	0	0	0	0	0
Otu00029	0	0	0	0	0	0	0	0	0	0	0	0	0	0	0	0	0	0	0	0	0	0	0	0	0	0	0	0	0	0	0	0	0	0	0	0	0	0	0	0	0	0	0	0	0	0	0	0	0
Otu00030	0	0	0	0	0	0	0	0	0	0	0	0	0	0	0	0	0	0	0	0	0	0	0	0	0	0	0	0	0	0	0	0	0	0	0	0	0	0	0	0	0	0	0	0	0	0	0	0	0
Otu00031	0	0	0	0	0	0	0	0	0	0	0	0	0	0	0	0	0	0	0	0	0	0	0	0	0	0	0	0	0	0.0297396	0.0367888	0.0171761	0.0289091	0	0	0	0	0	0	0	0	0	0	0	0	0.0228384	0	0	0
Otu00032	0	0	0	0	0	0	0	0	0	0	0	0	0	0	0	0	0	0	0	0	0	0	0	0	0	0	0	0	0	0	0	0	0	0	0	0	0	0	0	0	0	0	0	0	0	0	0	0	0
Otu00033	0	0	0	0	0	0	0	0	0	0	0	0	0	0	0	0	0	0	0	0	0	0	0	0	0	0	0	0	0	0	0	0	0	0	0	0	0	0	0	0	0	0	0	0	0	0	0	0	0
Otu00034	0.0342859	0	0.0735214	0.174267	0	0	0	0	0	0	0	0	0	0	0	0	0	0	0	0	0	0	0	0	0	0	0	0	0	0	0	0	0	0	0	0	0	0	0	0	0	0	0	0	0	0	0	0	0
Otu00035	0	0	0	0	0	0	0	0	0	0	0	0	0	0	0	0	0	0	0	0	0	0	0	0	0	0	0	0	0	0	0	0	0	0	0	0	0	0	0	0	0	0	0	0	0	0	0	0	0
Otu00036	0	0	0	0	0	0	0	0	0	0	0	0	0	0	0	0	0	0	0	0	0	0	0	0	0	0	0	0	0	0.0199923	0.0262257	0.0117202	0.0185573	0.0223176	0	0	0	0	0	0	0	0	0	0	0	0.0151413	0	0	0
Otu00037	0	0	0	0	0	0	0	0	0	0	0	0	0	0	0	0	0	0	0	0	0	0	0	0	0	0	0	0	0	0	0	0	0	0	0	0	0	0	0	0	0	0	0	0	0	0	0	0	0
Otu00038	0.0862127	0	0.0314635	0	0	0	0	0	0	0	0	0	0	0	0	0	0	0	0	0	0	0	0	0	0	0	0	0	0	0	0	0	0	0	0	0	0	0	0	0	0	0	0	0	0	0	0	0	0
Otu00039	0	0	0	0	0	0	0	0	0	0.0306824	0.039814	0.0338553	0.0209362	0.0297653	0	0	0	0	0	0	0	0	0	0	0	0	0	0	0	0	0	0	0	0	0	0	0	0	0	0	0	0	0	0	0.0280925	0	0	0	0
Otu00040	0.054402	0	0	0	0	0	0	0	0	0	0	0	0	0	0	0	0	0	0	0	0	0	0	0	0	0	0	0	0	0	0	0	0	0	0	0	0	0	0	0	0	0.0104902	0	0	0	0	0	0	0
Otu00041	0	0	0	0	0.0769955	0	0	0.0227043	0	0	0	0	0	0	0	0	0	0	0	0	0	0	0	0	0	0	0	0	0	0	0	0	0	0	0	0	0	0	0	0	0	0	0	0	0	0	0	0	0
Otu00042	0	0	0	0.010549	0	0	0	0	0	0	0	0	0	0	0	0	0	0	0	0	0	0	0	0	0	0	0	0	0	0	0	0	0	0	0	0	0	0	0	0	0	0	0	0	0	0	0	0	0
Otu00043	0	0	0	0	0	0	0	0	0	0	0	0	0	0	0	0	0	0	0	0	0	0	0	0	0	0	0	0	0	0	0	0	0	0	0	0	0	0	0	0	0	0	0	0	0	0	0	0	0
Otu00044	0	0	0	0.0113382	0	0	0	0	0	0	0	0	0	0	0	0	0	0	0	0	0	0	0	0	0	0	0	0	0	0	0	0	0	0	0	0	0	0	0	0	0	0	0	0	0	0	0	0	0
Otu00045	0	0	0	0	0	0	0	0	0	0	0	0	0	0	0	0	0	0	0	0	0	0	0	0	0	0	0	0	0	0	0	0	0	0	0	0	0	0	0	0	0	0	0	0	0	0	0	0	0
Otu00046	0	0	0	0	0	0	0	0	0	0	0	0	0	0	0	0	0	0	0	0	0	0	0	0	0	0	0	0	0	0	0	0	0	0	0	0	0	0	0	0	0	0	0	0	0	0	0	0	0
Otu00048	0	0.0385724	0	0	0	0	0	0	0	0	0	0	0	0	0	0	0	0	0	0	0	0	0	0	0	0	0	0	0	0	0	0	0	0	0	0	0	0	0	0	0	0	0	0	0	0	0	0	0
Otu00049	0	0	0	0	0	0	0	0	0	0	0	0	0	0	0	0	0	0	0	0	0	0	0	0	0.0603945	0	0	0	0	0	0	0	0	0	0	0	0	0	0	0	0	0	0	0	0	0	0	0	0
Otu00050	0	0	0	0	0	0	0	0	0	0	0	0	0	0	0	0	0	0	0	0	0	0	0	0	0	0	0	0	0	0	0	0	0	0	0	0	0	0	0	0	0	0	0	0	0	0	0	0	0
Otu00051	0	0	0	0	0	0	0	0	0	0	0	0	0	0	0	0	0	0	0	0	0	0	0	0	0	0	0	0	0	0	0	0	0	0	0	0	0	0	0	0	0	0	0	0	0	0	0	0	0
Otu00052	0	0	0	0	0	0	0	0	0	0	0	0	0	0	0	0	0	0	0	0	0	0	0	0	0	0	0	0	0	0	0	0	0	0	0	0	0	0	0	0	0	0	0	0	0	0	0	0	0
Otu00053	0	0	0	0	0	0	0	0	0	0	0	0	0	0	0	0	0	0	0	0	0	0	0	0	0	0	0	0	0	0	0	0	0	0	0	0	0	0	0	0	0	0	0	0	0	0	0	0	0
Otu00054	0	0	0	0	0	0	0	0	0	0	0	0	0	0	0	0	0	0	0	0	0	0	0	0	0	0	0	0	0	0	0	0	0	0	0	0	0	0	0	0	0	0	0.0778171	0	0	0	0	0	0
Otu00055	0	0	0	0	0	0	0	0	0	0	0	0	0	0	0	0	0	0	0	0	0	0	0	0	0	0	0	0	0	0	0	0	0	0	0	0	0	0	0	0	0	0	0	0	0	0	0	0	0
Otu00056	0	0	0	0.0335576	0	0	0	0	0	0	0	0	0	0	0	0	0	0	0	0	0	0	0	0	0	0	0	0	0	0	0	0	0	0	0	0	0	0	0	0	0	0	0	0	0	0	0	0	0
Otu00057	0	0	0	0	0	0	0	0	0	0	0	0	0	0	0	0	0	0	0	0	0	0	0	0	0	0	0	0	0	0	0	0	0	0	0	0	0	0	0	0	0	0	0	0	0	0	0	0	0
Otu00058	0	0	0	0	0	0	0	0	0	0	0	0	0	0	0	0	0	0	0	0	0	0	0	0	0	0	0	0	0	0	0	0	0	0	0	0	0	0	0	0	0	0.0269253	0	0	0	0	0	0	0
Otu00059	0	0	0	0	0	0	0	0	0	0	0	0	0	0	0	0	0	0	0	0	0	0	0	0	0	0	0	0	0	0	0	0	0	0	0	0	0	0	0	0	0	0	0	0	0	0	0	0	0
Otu00060	0	0	0	0	0	0	0	0	0	0	0	0	0	0	0	0	0	0	0	0	0	0	0	0	0	0	0	0	0	0	0	0	0	0	0	0	0	0	0	0	0	0	0	0	0	0	0	0	0
Otu00061	0	0	0	0	0	0	0	0	0	0	0	0	0	0	0	0	0	0	0	0	0	0	0	0	0	0	0	0	0	0	0	0	0	0	0	0	0	0	0	0	0	0	0	0	0	0	0	0	0
Otu00063	0	0	0	0	0	0	0	0	0	0	0	0	0	0	0	0	0	0	0	0	0	0	0	0	0	0	0	0	0	0	0	0	0	0	0	0	0	0	0	0	0	0	0	0	0	0	0	0	0
Otu00065	0.0243575	0	0	0	0	0	0	0	0	0	0	0	0	0	0	0	0	0	0	0	0	0	0	0	0	0	0	0	0	0	0	0	0	0	0	0	0	0	0	0	0	0	0	0	0	0	0	0	0
Otu00067	0	0	0	0	0	0	0	0	0	0	0	0	0	0	0	0	0	0	0	0	0	0	0	0	0	0	0	0	0	0	0	0	0	0	0	0	0	0	0	0	0	0	0	0	0	0	0	0	0
Otu00068	0	0	0	0.0647479	0	0	0	0	0	0	0	0	0	0	0	0	0	0	0	0	0	0	0	0	0	0	0	0	0	0	0	0	0	0	0	0	0	0	0	0	0	0	0	0	0	0	0	0	0
Otu00069	0	0	0	0.0737603	0	0	0	0	0	0	0	0	0	0	0	0	0	0	0	0	0	0	0	0	0	0	0	0	0	0	0	0	0	0	0	0	0	0	0	0	0	0	0	0	0	0	0	0	0
Otu00070	0	0	0	0	0	0	0	0	0	0	0	0	0	0	0	0	0	0	0	0	0	0	0	0	0	0	0	0	0	0	0	0	0	0	0	0	0	0	0	0	0	0	0	0	0	0	0	0	0
Otu00072	0	0	0	0	0	0	0	0	0	0	0	0	0	0	0	0	0	0	0	0	0	0	0	0	0	0	0	0	0	0	0	0	0	0	0	0	0	0	0	0	0	0	0	0	0	0	0	0	0
Otu00073	0	0	0	0	0	0	0	0	0	0	0	0	0	0	0	0	0	0	0	0	0	0	0	0	0	0	0	0	0	0	0	0	0	0	0	0	0	0	0	0	0	0	0	0	0	0	0	0	0
Otu00074	0	0	0	0	0	0	0	0	0	0	0	0	0	0	0	0	0	0	0	0	0	0	0	0	0	0	0	0	0	0	0	0	0	0	0	0	0	0	0	0	0	0	0	0	0	0	0	0	0
Otu00076	0	0	0	0	0	0	0	0	0	0	0	0	0	0	0	0	0	0	0	0	0	0	0	0	0	0	0	0	0	0	0	0	0	0	0	0	0	0	0	0	0	0	0	0	0	0	0	0	0
Otu00077	0	0	0	0	0	0	0	0	0	0	0	0	0	0	0	0	0	0	0	0	0	0	0	0	0	0	0	0	0	0	0	0	0	0	0	0	0	0	0	0	0	0	0.0286003	0	0	0	0	0	0
Otu00080	0	0	0	0	0	0	0	0	0	0	0	0	0	0	0	0	0	0	0	0	0	0	0	0	0	0	0	0	0	0	0	0	0	0	0	0	0	0	0	0	0	0	0	0	0	0	0	0	0
Otu00081	0	0	0	0	0	0	0	0	0	0	0	0	0	0	0	0	0	0	0	0	0	0	0	0	0	0	0	0	0	0	0	0	0	0	0	0	0	0	0	0	0	0	0	0	0	0	0	0	0
Otu00083	0	0	0	0	0	0	0	0	0	0	0	0	0	0	0	0	0	0	0	0	0	0	0	0	0	0	0	0	0	0	0	0	0	0	0	0	0	0	0	0	0	0	0	0	0	0	0	0	0
Otu00084	0	0	0	0	0	0	0	0	0	0	0	0	0	0	0	0	0	0	0	0	0	0	0	0	0	0	0	0	0	0	0	0	0	0	0	0	0	0	0	0	0	0	0	0	0	0	0	0	0
Otu00090	0	0	0	0	0	0	0	0	0	0	0	0	0	0	0	0	0	0	0	0	0	0	0	0	0	0	0	0	0	0	0	0	0	0	0	0	0	0	0	0	0	0	0	0	0	0	0	0	0
Otu00091	0	0	0	0	0	0	0	0	0	0	0	0	0	0	0	0	0	0	0	0	0	0	0	0	0	0	0	0	0	0	0	0	0	0	0	0	0	0	0	0	0	0	0	0	0	0	0	0	0
Otu00092	0	0	0	0	0	0	0	0	0	0	0	0	0	0	0	0	0	0	0	0	0	0	0	0	0	0	0	0	0	0	0	0	0	0	0	0	0	0	0	0	0	0	0	0	0	0	0	0	0
Otu00093	0	0	0	0	0	0	0	0	0	0	0	0	0	0	0	0	0	0	0	0	0	0	0	0	0	0	0	0	0	0	0	0	0	0	0	0	0	0	0	0	0	0	0	0	0	0	0	0	0
Otu00094	0	0	0	0	0	0	0	0	0	0	0	0	0	0	0	0	0	0	0	0	0	0	0	0	0	0	0	0	0	0	0	0	0	0	0	0	0	0	0	0	0	0	0	0	0	0	0	0	0
Otu00096	0	0	0	0	0	0	0	0	0	0	0	0	0	0	0	0	0	0	0	0	0	0	0	0	0	0	0	0	0	0	0	0	0	0	0	0	0	0	0	0	0	0	0	0	0	0	0	0	0
Otu00098	0	0	0	0	0	0	0	0	0	0	0	0	0	0	0	0	0	0	0	0	0	0	0	0	0	0	0	0	0	0	0	0	0	0	0	0	0	0	0	0	0	0	0	0	0	0	0	0	0
Otu00100	0	0	0	0	0	0	0	0	0	0	0	0	0	0	0	0	0	0	0	0	0	0	0	0	0	0	0	0	0	0	0	0	0	0	0	0	0	0	0	0	0	0	0	0	0	0	0	0	0
Otu00103	0	0	0	0	0	0	0	0	0	0	0	0	0	0	0	0	0	0	0	0	0	0	0	0	0	0	0	0	0	0	0	0	0	0	0	0	0	0	0	0	0	0	0	0	0	0	0	0	0
Otu00104	0	0	0	0.0244414	0	0	0	0	0	0	0	0	0	0	0	0	0	0	0	0	0	0	0	0	0	0	0	0	0	0	0	0	0	0	0	0	0	0	0	0	0	0	0	0	0	0	0	0	0
Otu00107	0	0	0	0	0	0	0	0	0	0	0	0	0	0	0	0	0	0	0	0	0	0	0	0	0	0	0	0	0	0	0	0	0	0	0	0	0	0	0	0	0	0	0	0	0	0	0	0	0
Otu00112	0	0	0	0	0	0	0	0	0	0	0	0	0	0	0	0	0	0	0	0	0	0	0	0	0	0	0	0	0	0	0	0	0	0.0247973	0	0	0	0	0	0	0	0	0	0	0	0	0	0	0
Otu00114	0	0	0	0	0	0	0	0	0	0	0	0	0	0	0	0	0	0	0	0	0	0	0	0	0	0	0	0	0	0	0	0	0	0	0	0	0	0	0	0	0	0	0	0	0	0	0	0	0
Otu00116	0	0	0	0	0	0	0	0	0	0	0	0	0	0	0	0	0	0	0	0	0	0	0	0	0	0	0	0	0	0	0	0	0	0	0	0	0	0	0	0	0	0	0	0	0	0	0	0	0
Otu00117	0	0	0	0	0	0	0	0	0	0	0	0	0	0	0	0	0	0	0	0	0	0	0	0	0	0	0	0	0	0	0	0	0	0	0	0	0	0	0	0	0	0	0	0	0	0	0	0	0
Otu00120	0	0	0	0	0	0	0	0	0	0	0	0	0	0	0	0	0	0	0	0	0	0	0	0	0	0	0	0	0	0	0	0	0	0	0	0	0	0	0	0	0	0	0	0	0	0	0	0	0
Otu00122	0	0	0	0	0	0	0	0	0	0	0	0	0	0	0	0	0	0	0	0	0	0	0	0	0	0	0	0	0	0	0	0	0	0	0	0	0	0	0	0	0	0	0	0	0	0	0	0	0
Otu00123	0	0	0	0	0	0	0	0	0	0	0	0	0	0	0	0	0	0	0	0	0	0	0	0	0	0	0	0	0	0	0	0	0	0	0	0	0	0	0	0	0	0	0	0	0	0	0	0	0
Otu00128	0	0	0	0	0	0	0	0	0	0	0	0	0	0	0	0	0	0	0	0	0	0	0	0	0	0	0	0	0	0	0	0	0	0	0	0	0	0	0	0	0	0	0	0	0	0	0	0	0
Otu00129	0	0	0	0.0138923	0	0	0	0	0	0	0	0	0	0	0	0	0	0	0	0	0	0	0	0	0	0	0	0	0	0	0	0	0	0	0	0	0	0	0	0	0	0	0	0	0	0	0	0	0
Otu00131	0	0	0	0	0	0	0	0	0	0	0	0	0	0	0	0	0	0	0	0	0	0	0	0	0	0	0	0	0	0	0	0	0	0	0	0	0	0	0	0	0	0	0	0	0	0	0	0	0
Otu00134	0	0	0	0	0	0	0	0	0	0	0	0	0	0	0	0	0	0	0	0	0	0	0	0	0	0	0	0	0	0	0	0	0	0	0	0	0	0	0	0	0	0	0	0	0	0	0	0	0
Otu00135	0	0	0	0	0	0	0	0	0	0	0	0	0	0	0	0	0	0	0	0	0	0	0	0	0	0	0	0	0	0	0	0	0	0	0	0	0	0	0	0	0	0	0	0	0	0	0	0	0
Otu00136	0	0	0	0	0	0	0	0	0	0	0	0	0	0	0	0	0	0	0	0	0	0	0	0	0	0	0	0	0	0	0	0	0	0	0	0	0	0	0	0	0	0	0	0	0	0	0	0	0
Otu00157	0	0	0	0	0	0	0	0	0	0	0	0	0	0	0	0	0	0	0	0	0	0	0	0	0	0	0	0	0	0	0	0	0	0	0	0	0	0	0	0	0	0	0	0	0	0	0	0	0
Otu00159	0	0	0	0	0	0	0	0	0	0	0	0	0	0	0	0	0	0	0	0	0	0	0	0	0	0	0	0	0	0	0	0	0	0	0	0	0	0	0	0	0	0	0	0	0	0	0	0	0
Otu00186	0	0	0	0	0	0	0	0	0	0	0	0	0	0	0	0	0	0	0	0	0	0	0	0	0	0	0	0	0	0	0	0	0	0	0	0	0	0	0	0	0	0	0	0	0	0	0	0	0
[truncated: 83 more columns]

## Sheet: S8 - Formica OTU IDs
	Rank1	Rank2	Rank3	Rank4	Rank5	Rank6
Otu00001	Bacteria	Proteobacteria	Gammaproteobacteria	Enterobacteriales	Enterobacteriaceae	Sodalis_like_Symbiont
Otu00002	Bacteria	Proteobacteria	Alphaproteobacteria	Rickettsiales	Anaplasmataceae	Wolbachia
Otu00003	Bacteria	Proteobacteria	Alphaproteobacteria	Rickettsiales	Anaplasmataceae	Wolbachia
Otu00004	Bacteria	Proteobacteria	Alphaproteobacteria	Rickettsiales	Anaplasmataceae	Wolbachia
Otu00005	Bacteria	Firmicutes	Bacilli	Lactobacillales	Lactobacillaceae	Lactobacillus
Otu00006	Bacteria	Firmicutes	Bacilli	Lactobacillales	Lactobacillaceae	Lactobacillus
Otu00007	Bacteria	Proteobacteria	Alphaproteobacteria	Rickettsiales	Anaplasmataceae	Wolbachia
Otu00008	Bacteria	Proteobacteria	Alphaproteobacteria	Rickettsiales	Anaplasmataceae	Wolbachia
Otu00009	Bacteria	Proteobacteria	Alphaproteobacteria	Acetobacterales	Acetobacteraceae	Acetobacteraceae_unclassified
Otu00010	Bacteria	Proteobacteria	Alphaproteobacteria	Acetobacterales	Acetobacterales_unclassified	Acetobacterales_unclassified
Otu00011	Bacteria	Proteobacteria	Alphaproteobacteria	Rickettsiales	Anaplasmataceae	Wolbachia
Otu00012	Bacteria	Firmicutes	Bacilli	Lactobacillales	Lactobacillaceae	Lactobacillaceae_unclassified
Otu00013	Bacteria	Tenericutes	Mollicutes	Entomoplasmatales	Spiroplasmataceae	Spiroplasma
Otu00014	Bacteria	Tenericutes	Mollicutes	Entomoplasmatales	Spiroplasmataceae	Spiroplasma
Otu00015	Bacteria	Tenericutes	Mollicutes	Entomoplasmatales	Spiroplasmataceae	Spiroplasma
Otu00016	Bacteria	Tenericutes	Mollicutes	Entomoplasmatales	Spiroplasmataceae	Spiroplasma
Otu00017	Bacteria	Proteobacteria	Alphaproteobacteria	Acetobacterales	Acetobacteraceae	Acetobacteraceae_unclassified
Otu00018	Bacteria	Actinobacteria	Actinobacteria	Corynebacteriales	uncultured	uncultured_ge
Otu00019	Bacteria	Proteobacteria	Gammaproteobacteria	Enterobacteriales	Enterobacteriaceae	Enterobacteriaceae_unclassified
Otu00020	Bacteria	Proteobacteria	Alphaproteobacteria	Rickettsiales	Anaplasmataceae	Wolbachia
Otu00021	Bacteria	Proteobacteria	Alphaproteobacteria	Acetobacterales	Acetobacteraceae	Acetobacteraceae_unclassified
Otu00022	Bacteria	Actinobacteria	Actinobacteria	Corynebacteriales	Tsukamurellaceae	Tsukamurella
Otu00023	Bacteria	Proteobacteria	Gammaproteobacteria	Enterobacteriales	Enterobacteriaceae	Yersinia
Otu00024	Bacteria	Proteobacteria	Gammaproteobacteria	Betaproteobacteriales	Burkholderiaceae	Burkholderia-Caballeronia-Paraburkholderia
Otu00025	Bacteria	Proteobacteria	Alphaproteobacteria	Rickettsiales	Anaplasmataceae	Wolbachia
Otu00026	Bacteria	Proteobacteria	Gammaproteobacteria	Pseudomonadales	Pseudomonadaceae	Pseudomonas
Otu00027	Bacteria	Actinobacteria	Actinobacteria	Corynebacteriales	uncultured	uncultured_ge
Otu00028	Bacteria	Tenericutes	Mollicutes	Entomoplasmatales	Entomoplasmataceae	Entomoplasmataceae_unclassified
Otu00029	Bacteria	Proteobacteria	Alphaproteobacteria	Rickettsiales	Anaplasmataceae	Wolbachia
Otu00030	Bacteria	Proteobacteria	Alphaproteobacteria	Rhizobiales	Methylopilaceae	Methylopila
Otu00031	Bacteria	Proteobacteria	Alphaproteobacteria	Rickettsiales	Anaplasmataceae	Wolbachia
Otu00032	Bacteria	Proteobacteria	Alphaproteobacteria	Acetobacterales	Acetobacteraceae	Acetobacteraceae_unclassified
Otu00033	Bacteria	Proteobacteria	Alphaproteobacteria	Rhizobiales	Rhizobiaceae	Rhizobiaceae_unclassified
Otu00034	Bacteria	Proteobacteria	Gammaproteobacteria	Pseudomonadales	Moraxellaceae	Acinetobacter
Otu00035	Bacteria	Proteobacteria	Alphaproteobacteria	Rickettsiales	Rickettsiaceae	Rickettsia
Otu00036	Bacteria	Proteobacteria	Alphaproteobacteria	Rickettsiales	Anaplasmataceae	Wolbachia
Otu00037	Bacteria	Proteobacteria	Gammaproteobacteria	Diplorickettsiales	Diplorickettsiaceae	Rickettsiella
Otu00038	Bacteria	Proteobacteria	Gammaproteobacteria	Xanthomonadales	Xanthomonadaceae	Stenotrophomonas
Otu00039	Bacteria	Proteobacteria	Alphaproteobacteria	Rickettsiales	Anaplasmataceae	Wolbachia
Otu00040	Bacteria	Proteobacteria	Gammaproteobacteria	Betaproteobacteriales	Burkholderiaceae	Delftia
Otu00041	Bacteria	Firmicutes	Bacilli	Lactobacillales	Lactobacillaceae	Lactobacillus
Otu00042	Bacteria	Proteobacteria	Gammaproteobacteria	Pseudomonadales	Pseudomonadaceae	Pseudomonas
Otu00043	Bacteria	Proteobacteria	Alphaproteobacteria	Caulobacterales	Caulobacteraceae	Brevundimonas
Otu00044	Bacteria	Proteobacteria	Gammaproteobacteria	Pseudomonadales	Moraxellaceae	Acinetobacter
Otu00045	Bacteria	Proteobacteria	Alphaproteobacteria	Rhizobiales	Rhizobiaceae	Allorhizobium-Neorhizobium-Pararhizobium-Rhizobium
Otu00046	Bacteria	Actinobacteria	Actinobacteria	Micrococcales	Microbacteriaceae	Galbitalea
Otu00048	Bacteria	Firmicutes	Bacilli	Lactobacillales	Lactobacillaceae	Lactobacillus
Otu00049	Bacteria	Proteobacteria	Alphaproteobacteria	Acetobacterales	Acetobacteraceae	Acetobacteraceae_unclassified
Otu00050	Bacteria	Proteobacteria	Gammaproteobacteria	Xanthomonadales	Xanthomonadaceae	Stenotrophomonas
Otu00051	Bacteria	Verrucomicrobia	Verrucomicrobiae	Chthoniobacterales	Terrimicrobiaceae	Terrimicrobium
Otu00052	Bacteria	Proteobacteria	Alphaproteobacteria	Caulobacterales	Caulobacteraceae	Brevundimonas
Otu00053	Bacteria	Proteobacteria	Alphaproteobacteria	Sphingomonadales	Sphingomonadaceae	Sphingomonas
Otu00054	Bacteria	Actinobacteria	Actinobacteria	Corynebacteriales	Mycobacteriaceae	Mycobacterium
Otu00055	Bacteria	Proteobacteria	Alphaproteobacteria	Sphingomonadales	Sphingomonadaceae	Sphingomonadaceae_unclassified
Otu00056	Bacteria	Bacteroidetes	Bacteroidia	Sphingobacteriales	Sphingobacteriaceae	Sphingobacterium
Otu00057	Bacteria	Proteobacteria	Alphaproteobacteria	Rickettsiales	Anaplasmataceae	Wolbachia
Otu00058	Bacteria	Proteobacteria	Gammaproteobacteria	Enterobacteriales	Enterobacteriaceae	Enterobacteriaceae_unclassified
Otu00059	Bacteria	Proteobacteria	Alphaproteobacteria	Rhizobiales	Rhizobiaceae	Brucella
Otu00060	Bacteria	Actinobacteria	Actinobacteria	Corynebacteriales	uncultured	uncultured_ge
Otu00061	Bacteria	Tenericutes	Mollicutes	Entomoplasmatales	Entomoplasmataceae	Entomoplasma
Otu00063	Bacteria	Chlamydiae	Chlamydiae	Chlamydiales	Simkaniaceae	Candidatus_Rhabdochlamydia
Otu00065	Bacteria	Proteobacteria	Gammaproteobacteria	Pseudomonadales	Moraxellaceae	Acinetobacter
Otu00067	Bacteria	Proteobacteria	Alphaproteobacteria	Rickettsiales	Anaplasmataceae	Wolbachia
Otu00068	Bacteria	Bacteroidetes	Bacteroidia	Flavobacteriales	Weeksellaceae	Chryseobacterium
Otu00069	Bacteria	Proteobacteria	Gammaproteobacteria	Enterobacteriales	Enterobacteriaceae	Enterobacteriaceae_unclassified
Otu00070	Bacteria	Proteobacteria	Gammaproteobacteria	Orbales	Orbaceae	Gilliamella
Otu00072	Bacteria	Firmicutes	Bacilli	Lactobacillales	Enterococcaceae	Enterococcus
Otu00073	Bacteria	Proteobacteria	Gammaproteobacteria	Betaproteobacteriales	Burkholderiaceae	Burkholderia-Caballeronia-Paraburkholderia
Otu00074	Bacteria	Actinobacteria	Actinobacteria	Micrococcales	Brevibacteriaceae	Brevibacterium
Otu00076	Bacteria	Proteobacteria	Alphaproteobacteria	Rhizobiales	Beijerinckiaceae	Methylobacterium
Otu00077	Bacteria	Proteobacteria	Gammaproteobacteria	Pseudomonadales	Pseudomonadaceae	Pseudomonas
Otu00080	Bacteria	Proteobacteria	Alphaproteobacteria	Rickettsiales	Anaplasmataceae	Wolbachia
Otu00081	Bacteria	Proteobacteria	Gammaproteobacteria	Betaproteobacteriales	Burkholderiaceae	Burkholderia-Caballeronia-Paraburkholderia
Otu00083	Bacteria	Proteobacteria	Gammaproteobacteria	Betaproteobacteriales	Burkholderiaceae	Achromobacter
Otu00084	Bacteria	Verrucomicrobia	Verrucomicrobiae	Verrucomicrobiales	Rubritaleaceae	Luteolibacter
Otu00090	Bacteria	Actinobacteria	Actinobacteria	Frankiales	Geodermatophilaceae	Modestobacter
Otu00091	Bacteria	Proteobacteria	Alphaproteobacteria	Rhizobiales	Rhizobiaceae	Shinella
Otu00092	Bacteria	Actinobacteria	Actinobacteria	Corynebacteriales	Tsukamurellaceae	Tsukamurella
Otu00093	Bacteria	Proteobacteria	Alphaproteobacteria	Acetobacterales	Acetobacteraceae	Acetobacteraceae_unclassified
Otu00094	Bacteria	Proteobacteria	Alphaproteobacteria	Acetobacterales	Acetobacteraceae	Acetobacteraceae_unclassified
Otu00096	Bacteria	Actinobacteria	Actinobacteria	Pseudonocardiales	Pseudonocardiaceae	Crossiella
Otu00098	Bacteria	Bacteroidetes	Bacteroidia	Sphingobacteriales	Sphingobacteriaceae	Sphingobacteriaceae_unclassified
Otu00100	Bacteria	Proteobacteria	Alphaproteobacteria	Sphingomonadales	Sphingomonadaceae	Sphingopyxis
Otu00103	Bacteria	Actinobacteria	Actinobacteria	Corynebacteriales	Nocardiaceae	Gordonia
Otu00104	Bacteria	Proteobacteria	Gammaproteobacteria	Pseudomonadales	Moraxellaceae	Acinetobacter
Otu00107	Bacteria	Planctomycetes	Planctomycetacia	Planctomycetales	Rubinisphaeraceae	Rubinisphaera
Otu00112	Bacteria	Proteobacteria	Alphaproteobacteria	Rickettsiales	Anaplasmataceae	Wolbachia
Otu00114	Bacteria	Firmicutes	Bacilli	Lactobacillales	Lactobacillaceae	Lactobacillus
Otu00116	Bacteria	Proteobacteria	Alphaproteobacteria	Rhizobiales	Devosiaceae	Devosia
Otu00117	Bacteria	Planctomycetes	Planctomycetacia	Isosphaerales	Isosphaeraceae	Isosphaera
Otu00120	Bacteria	Actinobacteria	Actinobacteria	Micrococcales	Cellulomonadaceae	Actinotalea
Otu00122	Bacteria	Proteobacteria	Alphaproteobacteria	Rhizobiales	Rhizobiaceae	Neorhizobium
Otu00123	Bacteria	Verrucomicrobia	Verrucomicrobiae	Verrucomicrobiales	Rubritaleaceae	Luteolibacter
Otu00128	Bacteria	Proteobacteria	Alphaproteobacteria	Rhizobiales	Beijerinckiaceae	Bosea
Otu00129	Bacteria	Proteobacteria	Gammaproteobacteria	Betaproteobacteriales	Burkholderiaceae	Comamonas
Otu00131	Bacteria	Bacteroidetes	Bacteroidia	Cytophagales	Spirosomaceae	Dyadobacter
Otu00134	Bacteria	Actinobacteria	Actinobacteria	Frankiales	Acidothermaceae	Acidothermus
Otu00135	Bacteria	Bacteroidetes	Bacteroidia	Cytophagales	Spirosomaceae	Dyadobacter
Otu00136	Bacteria	Proteobacteria	Alphaproteobacteria	Sphingomonadales	Sphingomonadaceae	Sphingomonas
Otu00157	Bacteria	Proteobacteria	Alphaproteobacteria	Rhizobiales	Devosiaceae	Devosia
Otu00159	Bacteria	Proteobacteria	Gammaproteobacteria	Betaproteobacteriales	Rhodocyclaceae	Rhodocyclaceae_unclassified
Otu00186	Bacteria	Actinobacteria	Actinobacteria	Micrococcales	Micrococcaceae	Haematomicrobium

## Sheet: S9 - Cardiocondyla OTU Table
	4.2_a_17	3.2_a_17	1.1_b_17	2.1_b_17	4.1_b_17	7.1_c_17	8.1_c_17	9.1_b_17	CARGYROMAL123 Q1	CARGYROMAL18 Q3	CARGYROMAL18 Q4	CARGYROMAL123 Q2	CLATIFRONSMAL8 Q1	CLATIFRONSMAL8 Q2	CMICROSECTAMAL56 Q1	CMICROSECTAMAL56 Q2	CMAURITCN4 Q1	CMAURITCN4 Q2	CMAURITCN9 Q1	CMAURITCN9 Q2	CMAURITCN14 Q1	CMAURIT#1 Q1	CMAURIT#1 Q2	CITSUKII4A Q1	CITSUKIIHI36 Q1	CITSUKIIHI37 Q1	CITSUKIIHI37 Q2	CITSUKIIHI34 Q1	CITSUKII1B1 Q1	CSHUCKARDIM85 Q1	CSHUCKARDIM87 Q1	CEMERYIMAL54 Q1	CEMERYIMAL54 Q2	CEMERYIMAL71 Q1	CEMERYIMAL71 Q2	CMINUTOROKINAWA Q1	CMINUTOROKINAWA Q2	CMINUTORISHIGAKI Q1	CMINUTORISHIGAKI Q2	10.1	10.2	CKOSHGEOII28	CKOSHGEOII38	CKOSHGEOII39	CARGYROMAL18 Q1
Otu00001	0	0	0	0	0	0	0	0	0	0	0	0	0	0	0	0	0.961889	0.119006	0.55714	0.857196	0	0.968653	0.979535	0	0	0	0	0	0	0	0	0	0	0	0	0	0	0	0	0	0	0	0	0	0
Otu00002	0	0	0	0	0	0	0	0	0	0	0	0	0	0	0	0	0	0	0	0	0	0	0	0.330119	0.961963	0.915205	0	0.988824	0.927251	0	0	0	0	0	0	0	0	0	0	0	0	0	0	0	0
Otu00003	0	0	0	0	0	0	0	0	0	0	0	0	0	0	0	0	0	0	0	0	0	0	0	0	0	0	0	0	0	0	0	0.0309283	0.694279	0.0190937	0.132704	0.133132	0	0	0	0.915425	0.491916	0	0	0	0
Otu00004	0	0	0	0.295938	0	0	0	0	0	0	0.0145846	0	0	0.169458	0.125218	0	0	0	0	0	0	0	0	0.0440418	0	0	0.266108	0	0.0187512	0	0	0.33475	0	0	0.321968	0.020772	0	0	0	0	0	0	0	0.612783	0.0169221
Otu00005	0	0	0	0	0	0	0	0	0	0	0	0	0	0	0	0	0	0	0	0	0	0	0	0	0	0	0	0	0	0.912362	0.735106	0	0	0	0	0	0	0	0	0	0	0	0	0	0
Otu00007	0	0	0	0.0915262	0	0	0	0	0	0	0	0	0	0	0	0	0	0	0.0237722	0.0954579	0	0	0	0.0579785	0	0	0	0	0	0	0	0	0.0100119	0.970994	0	0	0	0	0	0	0	0	0	0	0
Otu00008	0	0	0	0	0	0	0	0	0.0286921	0	0	0	0.98797	0	0	0	0	0	0	0	0	0	0	0	0	0	0	0	0	0	0	0	0	0	0	0	0.02265	0	0	0	0	0	0.792444	0	0
Otu00009	0	0	0	0	0	0	0	0	0	0	0	0	0	0	0	0	0	0	0	0	0	0	0	0	0	0	0	0	0	0	0	0	0	0	0	0	0	0	0	0	0	0.911305	0.0702992	0	0
Otu00010	0	0	0	0	0	0	0	0	0	0	0	0	0	0	0	0	0	0.498347	0	0	0.965576	0	0	0	0	0	0	0	0	0	0	0	0	0	0	0	0	0	0	0	0	0	0	0	0
Otu00011	0	0	0	0	0	0	0	0	0.0821734	0.0162846	0	0.0363946	0	0	0	0.0278821	0	0	0.0194491	0	0	0	0	0	0	0	0.0710278	0	0	0	0	0	0	0	0	0.0702969	0.24547	0.358979	0.171572	0	0	0	0	0	0.0722977
Otu00012	0	0	0	0	0	0	0	0	0	0	0	0	0	0.0101975	0	0	0	0	0	0	0	0	0	0	0	0	0	0	0	0	0	0	0	0	0.0105328	0	0	0	0	0	0	0	0	0	0
Otu00013	0.0384665	0	0.674821	0	0.0293998	0.860817	0.0378671	0.517697	0	0	0	0	0	0	0.0214998	0.144611	0	0	0	0	0	0	0	0	0	0	0	0	0	0	0	0	0.0435169	0	0.0107994	0	0	0	0	0	0	0	0	0	0
Otu00014	0	0	0	0	0.741017	0	0	0	0	0	0	0	0	0	0	0	0	0	0	0	0	0	0	0	0	0	0	0	0	0	0	0	0	0	0	0	0	0	0	0	0	0	0	0	0
Otu00015	0	0	0	0	0.0222865	0	0.311739	0	0	0	0	0	0	0	0	0	0	0	0	0	0	0	0	0	0	0	0	0	0	0.0152658	0	0	0.116175	0	0.0633078	0	0	0.0249885	0	0	0	0	0	0	0
Otu00016	0	0	0	0	0	0	0	0	0.0884938	0	0	0	0	0	0	0	0	0.0123161	0.0251397	0	0	0	0	0	0	0	0	0	0	0	0	0	0	0	0	0.117271	0	0.030111	0.283941	0	0	0.0120817	0	0	0
Otu00017	0	0	0	0	0	0	0	0	0	0	0	0	0	0	0	0.72213	0	0	0	0	0	0	0	0	0	0	0	0	0	0	0	0	0	0	0	0	0	0	0	0	0	0	0	0	0
Otu00018	0	0	0	0.0186668	0	0	0	0	0.0116564	0	0	0	0	0.0155163	0	0	0	0	0	0	0	0	0	0	0	0	0	0	0	0	0	0.284951	0.0794016	0	0	0	0	0.0228213	0	0	0	0	0.0333019	0	0
Otu00019	0	0	0	0	0	0	0	0	0	0	0	0	0	0	0	0	0	0	0	0	0	0	0	0	0	0	0	0	0	0	0	0	0	0	0	0.0192779	0	0	0	0	0	0	0	0.370753	0
Otu00021	0	0	0	0	0	0	0	0	0.0259463	0.103878	0.07698	0.0607329	0	0	0	0	0	0	0	0	0	0	0	0	0	0	0	0	0	0	0	0	0	0	0	0.0274865	0.0361623	0	0.0439598	0	0	0	0	0	0
Otu00022	0.320687	0.033001	0	0	0	0	0	0	0	0	0	0	0	0	0	0	0	0	0	0	0	0	0	0	0	0	0	0	0	0	0	0	0	0	0	0	0	0	0	0	0	0	0	0	0
Otu00023	0	0	0	0	0	0.0126959	0	0	0.0375509	0.0545769	0.0115829	0.119715	0	0	0	0	0	0	0	0	0	0	0	0	0	0	0	0	0	0	0	0	0	0	0	0.0257828	0.023907	0	0.0321013	0	0	0	0	0	0.0223299
Otu00024	0	0	0	0	0	0	0	0	0	0	0	0	0	0.123987	0.0466409	0	0	0	0	0	0	0	0	0	0	0	0.174402	0	0	0	0	0.100101	0	0	0	0	0	0	0	0	0	0	0	0	0
Otu00025	0	0	0	0	0	0	0	0	0	0	0	0	0	0	0	0	0	0	0	0	0	0	0	0	0	0	0	0	0	0	0.24619	0	0	0	0	0	0	0	0	0	0	0	0	0	0
Otu00026	0	0	0	0	0	0	0	0	0	0	0	0	0	0	0	0	0.0207552	0.275981	0.0393388	0.0218753	0	0	0	0	0	0	0	0	0	0	0	0	0	0	0	0	0	0	0	0	0	0	0	0	0
Otu00027	0	0	0	0	0	0	0	0	0	0	0	0	0	0	0	0	0	0	0	0	0	0	0	0.294943	0	0	0	0	0	0	0	0	0	0	0	0	0	0	0	0	0	0	0	0	0
Otu00028	0	0	0	0	0	0	0	0	0.136225	0	0	0	0	0	0	0	0	0	0	0	0	0	0	0	0	0	0.0118906	0	0	0	0	0	0	0	0	0.0316682	0.0337146	0.0240363	0	0	0	0	0	0	0
Otu00030	0	0	0	0	0	0	0	0.0442083	0	0	0	0	0	0	0	0	0	0	0	0	0	0	0	0.0418601	0	0.0176975	0.0574465	0	0.0243904	0	0	0	0	0	0	0.0348023	0	0	0	0	0	0	0	0	0
Otu00031	0	0	0	0	0	0	0	0	0.0200577	0	0	0	0	0	0	0	0	0	0	0	0	0	0	0	0	0	0.0285189	0	0	0	0	0	0	0	0	0.015907	0.0152075	0.0677087	0.0497234	0	0	0	0	0	0
Otu00032	0	0	0	0	0	0	0	0	0.0207398	0	0	0	0	0	0	0	0	0	0	0	0	0	0	0	0	0	0.0121321	0	0	0	0	0	0	0	0	0	0	0.127931	0.0241387	0	0	0	0	0	0
Otu00033	0	0	0	0	0	0	0	0	0	0	0	0	0	0.0634759	0	0	0	0	0	0	0	0	0	0	0	0	0	0	0	0	0	0	0	0	0.0164362	0	0	0	0	0	0	0	0	0	0.0157788
Otu00034	0.165324	0	0	0	0	0	0	0	0	0	0	0	0	0	0	0	0	0	0	0	0	0	0	0	0	0	0	0	0	0	0	0	0	0	0	0	0	0	0	0	0	0	0	0	0
Otu00035	0	0	0	0	0	0	0	0	0	0.0174604	0.0226328	0	0	0	0	0	0	0	0	0	0	0	0	0.0214381	0	0	0.0277943	0	0.0113148	0	0	0	0	0	0	0	0.0132559	0	0	0	0	0	0	0	0.0566731
Otu00036	0	0	0	0	0	0	0	0	0	0	0	0.0148358	0	0.0185891	0	0	0	0	0	0	0	0	0	0	0	0	0	0	0	0	0	0.0580806	0	0	0.0363537	0	0	0	0	0	0	0	0	0	0.0109699
Otu00037	0	0	0	0	0	0	0	0	0.041894	0	0.0157484	0	0	0.0122729	0	0	0	0	0	0	0	0	0	0	0	0	0	0	0	0	0	0	0	0	0	0	0	0	0	0	0	0	0	0	0.0737222
Otu00038	0	0	0	0	0	0	0	0	0	0	0	0	0	0	0	0	0	0	0	0	0	0	0	0.0939113	0	0	0	0	0	0	0	0	0	0	0	0	0.0221125	0.010037	0	0	0	0	0	0	0
Otu00039	0	0	0	0	0	0	0	0	0	0	0	0	0	0	0	0	0	0	0	0	0	0	0	0	0	0	0	0	0	0	0	0	0	0	0	0	0	0	0	0	0.136582	0	0	0	0
Otu00040	0	0	0	0	0	0	0	0	0	0.0135584	0	0	0	0	0	0	0	0	0	0	0	0	0	0	0	0	0	0	0	0	0	0	0	0	0	0	0.115417	0	0	0	0	0	0	0	0
Otu00041	0	0	0	0	0	0	0	0	0	0.0490099	0.0182172	0.0467364	0	0	0	0	0	0	0	0	0	0	0	0	0	0	0	0	0	0	0	0	0	0	0	0.01096	0	0	0	0	0	0	0	0	0
Otu00042	0	0.0359803	0.115676	0	0	0	0	0	0	0	0.0343462	0.019005	0	0	0	0	0	0	0	0	0	0	0	0	0	0	0	0	0	0	0	0	0	0	0	0	0	0	0	0	0.0316633	0	0	0	0
Otu00043	0	0	0	0	0	0	0	0	0	0	0	0	0	0.0142226	0	0	0	0	0	0	0	0	0	0	0	0	0	0	0	0	0	0.134943	0	0	0	0	0	0	0	0	0	0	0	0	0
Otu00044	0	0	0	0	0	0	0.285048	0	0	0	0	0	0	0	0	0	0	0	0	0	0	0	0	0	0	0	0	0	0	0	0	0	0	0	0	0	0	0	0	0	0	0	0	0	0
Otu00045	0	0	0	0	0	0	0	0	0	0	0	0	0	0.120995	0	0	0	0	0	0	0	0	0	0	0	0	0	0	0	0	0	0	0	0	0	0	0	0	0	0	0	0	0	0	0
Otu00046	0	0	0	0	0	0	0.270587	0	0	0	0	0	0	0	0	0	0	0	0	0	0	0	0	0	0	0	0	0	0	0	0	0	0	0	0	0	0	0	0	0	0	0	0	0	0
Otu00047	0	0	0	0	0	0	0	0	0	0	0	0	0	0.0117249	0	0	0	0	0	0	0	0	0	0	0	0	0	0	0	0	0	0	0	0	0.051901	0	0	0	0	0	0	0	0	0	0.0436799
Otu00048	0	0	0	0	0	0	0	0	0	0	0.013856	0	0	0.0219493	0	0	0	0	0	0	0	0	0	0	0	0	0	0	0	0	0	0	0	0	0	0	0	0	0	0	0	0	0	0	0.0417472
Otu00049	0	0	0	0	0	0	0	0	0	0	0	0	0	0	0	0	0	0	0	0	0	0	0	0	0	0	0	0	0	0	0	0	0	0	0.0889213	0	0	0	0	0	0	0	0	0	0
Otu00050	0	0	0	0	0	0	0	0	0	0	0.0109086	0	0	0.0347343	0	0	0	0	0.015484	0	0	0	0	0	0	0	0.0109617	0	0	0	0	0	0	0	0	0	0	0	0	0	0	0	0	0	0.0133199
Otu00051	0	0	0	0	0	0	0	0	0	0	0	0	0	0	0.185989	0	0	0	0	0	0	0	0	0	0	0	0	0	0	0	0	0	0	0	0	0	0	0	0	0	0	0	0	0	0
Otu00052	0	0	0	0	0	0	0	0.381452	0	0	0	0	0	0	0	0	0	0	0	0	0	0	0	0	0	0	0	0	0	0	0	0	0	0	0	0	0	0	0	0	0	0	0	0	0
Otu00053	0	0	0	0	0	0	0	0	0	0	0	0	0	0	0.196407	0	0	0	0	0	0	0	0	0	0	0	0	0	0	0	0	0	0	0	0	0	0	0	0	0	0	0	0	0	0
Otu00055	0	0	0	0	0	0	0	0	0	0.0501545	0.0203924	0.0342559	0	0	0	0	0	0	0	0	0	0	0	0	0	0	0	0	0	0	0	0	0	0	0	0	0	0	0	0	0	0	0	0	0
Otu00056	0	0	0	0	0	0	0	0	0	0.0610907	0.0302351	0.0158014	0	0	0	0	0	0	0	0	0	0	0	0	0	0	0	0	0	0	0	0	0	0	0	0	0	0	0	0	0	0	0	0	0
Otu00058	0	0	0	0	0	0	0	0	0	0	0	0	0	0	0	0	0	0	0	0	0	0	0	0	0	0	0.0242828	0	0	0	0	0	0	0	0	0	0	0	0	0	0	0	0	0	0
Otu00059	0	0	0	0	0	0	0	0	0	0	0	0	0	0	0	0	0	0	0	0	0	0	0	0	0	0	0	0	0	0	0	0	0	0	0	0.0585352	0	0	0	0	0	0	0	0	0
Otu00060	0	0	0	0	0	0	0	0	0	0	0.0189459	0.016045	0	0	0	0	0	0	0	0	0	0	0	0	0	0	0.0108873	0	0	0	0	0	0	0	0	0	0	0	0	0	0	0	0	0	0.0123672
Otu00061	0.0589678	0	0	0	0	0	0	0	0	0	0	0	0	0	0	0	0	0	0	0	0	0	0	0	0	0	0	0	0	0	0	0	0	0	0	0	0	0	0	0	0	0	0	0	0
Otu00062	0	0	0	0	0	0	0	0	0	0	0	0	0	0	0	0	0	0	0	0	0	0	0	0	0	0	0.0122808	0	0	0	0	0	0	0	0	0	0.011048	0.0363827	0.0102821	0	0	0	0	0	0
Otu00063	0	0	0	0	0	0	0	0	0	0	0.0279621	0	0	0	0	0	0	0	0	0	0	0	0	0	0	0	0	0	0	0	0	0	0	0	0	0	0	0	0	0	0	0	0	0	0.0406856
Otu00064	0	0	0	0	0	0	0	0	0	0	0	0	0	0	0	0	0	0	0	0	0	0	0	0	0	0	0	0	0	0	0	0	0	0	0	0	0	0	0	0	0.0799633	0	0	0	0
Otu00065	0	0	0	0	0	0	0	0	0	0	0.0209362	0	0	0	0	0	0	0	0	0	0	0	0	0	0	0	0	0	0	0	0	0	0	0	0	0	0	0.0264224	0	0	0	0	0	0	0
Otu00066	0	0.85012	0	0	0	0	0	0	0	0	0	0	0	0	0	0	0	0	0	0	0	0	0	0	0	0	0	0	0	0	0	0	0	0	0	0	0	0	0	0	0	0	0	0	0
Otu00067	0	0	0	0	0	0	0	0	0	0	0	0	0	0	0	0	0	0	0	0	0	0	0	0	0	0	0	0	0	0	0	0	0	0	0	0.0686935	0	0	0	0	0	0	0	0	0
Otu00068	0.0530252	0	0	0	0	0	0	0	0	0	0	0	0	0	0	0	0	0	0	0	0	0	0	0	0	0	0	0	0	0	0	0	0	0	0	0	0	0	0	0	0	0	0	0	0
Otu00069	0	0	0	0.0213598	0	0	0	0	0	0	0	0	0	0.0462795	0	0	0	0	0	0	0	0	0	0	0	0	0	0	0	0	0	0	0	0	0.0100143	0	0	0	0	0	0	0	0	0	0
Otu00070	0	0	0.168087	0	0	0	0	0	0	0	0	0	0	0	0	0	0	0	0	0	0	0	0	0	0	0	0	0	0	0	0	0	0	0	0	0	0	0	0	0	0	0	0	0	0
Otu00071	0	0	0	0	0	0	0	0	0	0	0	0	0	0	0	0	0	0	0	0	0	0	0	0	0	0	0	0	0	0	0	0	0	0	0	0	0.0103285	0.0296841	0	0	0	0	0	0	0
Otu00072	0	0	0	0	0	0	0	0	0	0	0	0	0	0	0	0	0	0	0	0	0	0	0	0	0	0	0	0	0	0	0	0	0	0	0	0	0	0	0	0	0.0175433	0	0	0	0.0196351
Otu00073	0	0	0	0	0	0	0	0	0	0	0	0	0	0	0.0880898	0	0	0	0	0	0	0	0	0	0	0	0	0	0	0	0	0	0	0	0	0	0	0	0	0	0	0	0	0	0
Otu00074	0	0	0	0	0	0	0	0	0.0310406	0	0	0.0191223	0	0	0	0	0	0	0	0	0	0	0	0	0	0	0	0	0	0	0	0	0	0	0	0	0	0	0	0	0	0	0	0	0
Otu00075	0	0	0	0	0	0	0	0	0	0	0	0	0	0	0.0263259	0	0	0	0	0	0	0	0	0	0	0	0	0	0	0	0	0	0	0	0	0	0	0	0	0	0	0	0	0	0.0258776
Otu00076	0	0	0	0	0	0	0	0	0	0	0	0	0	0.0132163	0	0	0	0	0	0	0	0	0	0	0	0	0.0171299	0	0	0	0	0	0	0	0	0	0	0	0	0	0	0	0	0	0
Otu00077	0	0	0	0	0	0	0	0	0	0	0	0	0	0	0	0	0	0	0	0	0	0.0194738	0.0109939	0	0	0	0	0	0	0	0	0	0	0	0	0	0	0	0	0	0	0	0	0	0
Otu00078	0	0	0	0	0	0	0	0	0	0	0	0	0	0	0	0	0	0	0	0	0	0	0	0	0	0	0	0	0	0	0	0	0	0	0	0	0	0.0166481	0	0	0	0	0	0	0
Otu00079	0	0	0	0	0	0	0	0	0	0.01745	0	0.0382717	0	0	0	0	0	0	0	0	0	0	0	0	0	0	0	0	0	0	0	0	0	0	0	0	0	0	0	0	0	0	0	0	0
Otu00080	0.0390165	0	0	0	0	0	0	0	0	0	0	0	0	0	0	0	0	0	0	0	0	0	0	0	0	0	0	0	0	0	0	0	0	0	0	0	0	0	0	0	0	0	0	0	0
Otu00081	0	0	0	0	0	0	0	0	0	0	0	0	0	0.0118776	0	0	0	0	0	0	0	0	0	0	0	0	0	0	0	0	0	0	0	0	0.0185768	0	0	0	0	0	0	0	0	0	0
Otu00082	0	0	0	0	0	0	0	0	0	0	0	0	0	0	0	0	0	0	0	0	0	0	0	0	0	0	0	0	0	0	0	0	0	0	0	0	0	0	0	0	0.0587514	0	0	0	0
Otu00083	0	0	0	0	0	0	0	0	0	0	0.0478433	0	0	0	0	0	0	0	0	0	0	0	0	0	0	0	0	0	0	0	0	0	0	0	0	0	0	0	0	0	0	0	0	0	0
Otu00084	0	0	0	0	0	0	0	0	0	0	0.0138995	0.0241488	0	0	0	0	0	0	0	0	0	0	0	0	0	0	0	0	0	0	0	0	0	0	0	0.0103222	0	0	0	0	0	0	0	0	0
Otu00085	0	0	0	0	0	0	0	0	0	0	0	0	0	0	0	0	0	0	0	0	0	0	0	0	0	0	0	0	0	0	0	0	0	0	0	0	0	0	0	0	0	0	0	0	0.0367568
Otu00086	0	0	0	0	0	0	0	0	0	0	0	0	0	0	0	0	0	0	0	0	0	0	0	0	0	0	0	0	0	0	0	0	0	0	0.0381388	0	0	0	0	0	0	0	0	0	0
Otu00087	0	0	0	0	0	0	0	0	0	0	0	0	0	0	0	0	0	0	0.048352	0	0	0	0	0	0	0	0	0	0	0	0	0	0	0	0	0	0	0	0	0	0	0	0	0	0
Otu00088	0	0	0	0	0	0	0	0	0	0	0	0	0	0	0.0342184	0	0	0	0	0	0	0	0	0	0	0	0	0	0	0	0	0	0	0	0	0	0	0	0	0	0	0	0	0	0.0195534
Otu00089	0	0	0	0	0	0	0	0	0	0.023454	0	0	0	0	0	0	0	0	0	0	0	0	0	0	0	0	0	0	0	0	0	0	0	0	0	0	0	0	0	0	0	0	0	0	0.0100081
Otu00090	0	0	0	0	0	0	0	0	0	0	0	0	0	0	0	0	0	0	0	0	0	0	0	0	0	0	0	0	0	0	0	0	0	0	0	0.0385376	0	0	0	0	0	0	0	0	0
Otu00091	0	0	0	0	0	0	0	0	0.0179595	0	0	0	0	0.0172324	0	0	0	0	0	0	0	0	0	0	0	0	0	0	0	0	0	0	0	0	0	0	0	0	0	0	0	0	0	0	0
Otu00092	0	0	0	0	0	0	0	0	0	0.0109778	0.0211646	0.0150614	0	0	0	0	0	0	0	0	0	0	0	0	0	0	0	0	0	0	0	0	0	0	0	0	0	0	0	0	0	0	0	0	0
Otu00093	0	0	0	0	0	0	0	0	0.0141949	0	0	0	0	0	0	0	0	0	0	0	0	0	0	0	0	0	0	0	0	0	0	0	0	0	0	0	0	0	0	0	0	0	0	0	0
Otu00094	0	0	0	0	0	0	0	0	0	0	0	0	0	0	0	0	0	0	0	0	0	0	0	0	0	0	0	0	0	0	0	0	0	0	0	0	0.0308864	0	0	0	0	0	0	0	0
Otu00095	0	0	0	0	0	0	0	0	0	0.0156395	0.0130294	0	0	0	0	0	0	0	0	0	0	0	0	0	0	0	0	0	0	0	0	0	0	0	0	0	0	0	0	0	0	0	0	0	0
Otu00096	0	0	0	0.130188	0	0	0	0	0	0	0	0	0	0	0	0	0	0	0	0	0	0	0	0	0	0	0	0	0	0	0	0	0	0	0	0	0	0	0	0	0	0	0	0	0
Otu00097	0	0	0	0	0	0	0	0	0	0	0	0	0	0	0	0	0	0	0	0	0	0	0	0	0	0	0	0	0	0	0	0	0	0	0	0	0	0	0	0	0	0	0	0	0.0344702
Otu00098	0.0115415	0	0	0	0	0	0	0	0	0	0	0	0	0.0153726	0	0	0	0	0	0	0	0	0	0	0	0	0	0	0	0	0	0	0	0	0	0	0	0	0	0	0	0	0	0	0
Otu00100	0	0	0	0	0	0	0	0	0	0	0	0	0	0	0.0674437	0	0	0	0	0	0	0	0	0	0	0	0	0	0	0	0	0	0	0	0	0	0	0	0	0	0	0	0	0	0
Otu00101	0	0	0	0	0	0	0	0	0	0	0	0	0	0	0	0	0	0	0	0	0	0	0	0	0	0	0.0266981	0	0	0	0	0	0	0	0	0	0	0	0	0	0	0	0.025396	0	0
Otu00102	0	0	0	0	0.0400179	0	0	0	0	0	0	0	0	0	0	0	0	0	0	0	0	0	0	0	0	0	0	0	0	0	0	0	0	0	0	0	0	0	0	0	0	0	0	0	0
Otu00104	0.0287277	0	0	0	0	0	0	0	0	0	0	0	0	0	0	0	0	0	0	0	0	0	0	0	0	0	0	0	0	0	0	0	0	0	0	0	0	0	0	0	0	0	0	0	0
Otu00105	0	0	0	0.105286	0	0	0	0	0	0	0	0	0	0	0	0	0	0	0	0	0	0	0	0	0	0	0	0	0	0	0	0	0	0	0	0	0	0	0	0	0	0	0	0	0
Otu00106	0	0	0	0	0	0	0	0	0	0	0.0149218	0	0	0	0	0	0	0	0	0	0	0	0	0	0	0	0	0	0	0	0	0	0	0	0	0	0	0	0	0	0	0	0	0	0
Otu00107	0	0	0	0	0	0	0	0	0	0.0112067	0	0	0	0	0	0	0	0	0	0	0	0	0	0	0	0	0	0	0	0	0	0	0	0	0	0	0	0	0	0	0	0	0	0	0.0146356
Otu00108	0	0	0	0	0	0	0	0	0	0.0111235	0.025254	0	0	0	0	0	0	0	0	0	0	0	0	0	0	0	0	0	0	0	0	0	0	0	0	0	0	0	0	0	0	0	0	0	0
Otu00109	0	0	0	0	0	0	0	0	0	0.012112	0	0	0	0	0	0	0	0	0	0	0	0	0	0	0	0	0	0	0	0	0	0	0	0	0	0	0	0	0	0	0	0	0	0	0
Otu00110	0.027643	0	0	0	0	0	0	0	0	0	0	0	0	0	0	0	0	0	0	0	0	0	0	0	0	0	0	0	0	0	0	0	0	0	0	0	0	0	0	0	0	0	0	0	0
Otu00111	0	0	0	0	0	0	0	0	0	0	0	0	0	0	0	0	0	0	0.0331433	0	0	0	0	0	0	0	0	0	0	0	0	0	0	0	0	0	0	0	0	0	0	0	0	0	0
Otu00112	0	0	0	0	0	0	0	0	0	0	0	0	0	0	0	0	0	0	0	0	0	0	0	0	0	0	0	0	0	0	0	0	0	0	0	0	0	0	0	0	0.0225663	0	0	0	0
Otu00113	0	0	0	0	0	0	0	0	0	0	0.0359994	0	0	0	0	0	0	0	0	0	0	0	0	0	0	0	0	0	0	0	0	0	0	0	0	0	0	0	0	0	0	0	0	0	0
Otu00114	0	0	0	0	0	0	0	0	0	0	0	0	0	0	0	0	0	0	0	0	0	0	0	0	0	0	0	0	0	0	0	0	0	0	0	0	0	0	0.0111556	0	0	0	0	0	0
Otu00115	0	0	0	0	0	0	0.0694467	0	0	0	0	0	0	0	0	0	0	0	0	0	0	0	0	0	0	0	0	0	0	0	0	0	0	0	0	0	0	0	0	0	0	0	0	0	0
Otu00116	0	0	0	0	0	0	0	0	0	0	0	0	0	0	0	0	0	0	0	0	0	0	0	0	0	0	0	0	0	0	0	0	0	0	0.0174139	0	0	0	0	0	0	0	0	0	0
Otu00120	0.0252064	0	0	0	0	0	0	0	0	0	0	0	0	0	0	0	0	0	0	0	0	0	0	0	0	0	0	0	0	0	0	0	0	0	0	0	0	0	0	0	0	0	0	0	0
Otu00121	0	0	0	0	0	0	0	0	0	0	0	0	0	0.0289033	0	0	0	0	0	0	0	0	0	0	0	0	0	0	0	0	0	0	0	0	0	0	0	0	0	0	0	0	0	0	0
Otu00122	0.0250231	0	0	0	0	0	0	0	0	0	0	0	0	0	0	0	0	0	0	0	0	0	0	0	0	0	0	0	0	0	0	0	0	0	0	0	0	0	0	0	0	0	0	0	0
Otu00124	0.0216317	0	0	0	0	0	0	0	0	0	0	0	0	0	0	0	0	0	0	0	0	0	0	0	0	0	0	0	0	0	0	0	0	0	0	0	0	0	0	0	0	0	0	0	0
Otu00126	0	0	0	0	0	0	0	0	0	0	0	0	0	0	0.0537494	0	0	0	0	0	0	0	0	0	0	0	0	0	0	0	0	0	0	0	0	0	0	0	0	0	0	0	0	0	0
Otu00127	0	0	0	0	0	0	0	0	0	0	0	0.0187704	0	0	0	0	0	0	0	0	0	0	0	0	0	0	0	0	0	0	0	0	0	0	0	0	0	0	0	0	0	0	0	0	0
Otu00128	0	0	0	0	0	0	0	0	0	0	0	0	0	0	0	0	0	0	0	0	0	0	0	0	0	0	0	0	0	0	0	0	0	0	0	0	0	0	0	0	0.0322711	0	0	0	0
Otu00129	0	0	0	0	0	0	0	0	0	0	0	0	0	0	0	0	0	0	0	0	0	0	0	0	0	0	0	0	0	0	0	0	0	0	0	0	0	0	0	0	0.0281759	0	0	0	0
Otu00130	0	0	0	0	0	0	0	0	0	0	0	0	0	0	0	0	0	0	0	0	0	0	0	0	0	0	0	0	0	0	0	0	0	0	0.0142363	0	0	0	0	0	0	0	0	0	0
Otu00131	0	0	0	0	0	0	0	0	0	0	0	0	0	0	0	0	0	0	0	0	0	0	0	0	0.0231802	0	0	0	0	0	0	0	0	0	0	0	0	0	0	0	0	0	0	0	0
Otu00132	0	0	0	0	0	0	0	0	0	0.0117166	0	0.0122007	0	0	0	0	0	0	0	0	0	0	0	0	0	0	0	0	0	0	0	0	0	0	0	0	0	0	0	0	0	0	0	0	0
Otu00133	0	0	0	0.0113624	0	0	0	0	0	0	0	0	0	0	0	0	0	0	0	0	0	0	0	0	0	0	0	0	0	0	0	0	0	0	0	0	0	0	0	0	0	0	0	0	0
Otu00134	0	0	0	0	0	0	0	0	0	0	0	0	0	0	0	0	0	0	0	0	0	0	0	0	0	0	0	0	0	0	0	0	0	0	0	0	0	0	0	0	0	0	0.0414139	0	0
Otu00135	0	0	0	0	0	0	0	0	0	0	0	0	0	0	0	0	0	0	0	0	0	0	0	0	0	0	0	0	0	0	0	0	0	0	0.0182731	0	0	0	0	0	0	0	0	0	0
Otu00137	0	0	0	0	0	0	0	0	0	0.0235997	0	0	0	0	0	0	0	0	0	0	0	0	0	0	0	0	0	0	0	0	0	0	0	0	0	0	0	0	0	0	0	0	0	0	0
Otu00138	0	0	0	0	0	0	0	0	0	0	0	0	0	0	0	0	0	0	0	0	0	0	0	0	0	0	0	0	0	0	0	0	0	0	0	0	0	0.0117007	0	0	0	0	0	0	0
Otu00139	0	0	0	0	0.0280479	0	0	0	0	0	0	0	0	0	0	0	0	0	0	0	0	0	0	0	0	0	0	0	0	0	0	0	0	0	0	0	0	0	0	0	0	0	0	0	0
Otu00140	0	0	0	0	0	0	0	0	0	0	0	0	0	0	0	0	0	0	0	0	0	0	0	0	0	0	0	0	0	0	0	0	0	0	0	0	0	0	0	0	0.0279413	0	0	0	0
Otu00141	0	0	0	0	0	0	0	0	0	0.0261282	0	0	0	0	0	0	0	0	0	0	0	0	0	0	0	0	0	0	0	0	0	0	0	0	0	0	0	0	0	0	0	0	0	0	0
Otu00142	0	0	0	0	0.0257496	0	0	0	0	0	0	0	0	0	0	0	0	0	0	0	0	0	0	0	0	0	0	0	0	0	0	0	0	0	0	0	0	0	0	0	0	0	0	0	0
Otu00143	0	0	0	0	0	0	0	0	0.0182358	0	0	0	0	0	0	0	0	0	0	0	0	0	0	0	0	0	0	0	0	0	0	0	0	0	0	0	0	0	0	0	0	0	0	0	0
Otu00144	0	0	0	0	0.0248656	0	0	0	0	0	0	0	0	0	0	0	0	0	0	0	0	0	0	0	0	0	0	0	0	0	0	0	0	0	0	0	0	0	0	0	0	0	0	0	0
Otu00145	0	0	0	0	0	0	0	0	0	0	0.0122137	0	0	0	0	0	0	0	0	0	0	0	0	0	0	0	0	0	0	0	0	0	0	0	0	0	0	0	0	0	0	0	0	0	0
Otu00146	0	0	0	0	0	0	0	0	0.0107239	0	0	0	0	0	0	0	0	0	0	0	0	0	0	0	0	0	0	0	0	0	0	0	0	0	0	0	0	0	0	0	0	0	0	0	0
Otu00148	0	0	0	0	0	0	0	0	0	0.0121224	0	0	0	0	0	0	0	0	0	0	0	0	0	0	0	0	0	0	0	0	0	0	0	0	0	0	0	0	0	0	0	0	0	0	0
Otu00149	0	0	0	0	0	0	0	0	0	0	0	0.0120112	0	0	0	0	0	0	0	0	0	0	0	0	0	0	0	0	0	0	0	0	0	0	0	0	0	0	0	0	0	0	0	0	0
Otu00150	0	0	0	0	0	0	0	0	0	0	0	0	0	0	0	0	0	0	0	0	0	0	0	0	0	0	0	0	0	0	0	0	0	0	0	0	0	0	0	0	0.0230996	0	0	0	0
Otu00151	0	0	0	0	0	0	0	0	0	0	0	0	0	0	0	0	0	0	0	0	0	0	0	0	0	0	0	0	0	0.0208294	0	0	0	0	0	0	0	0	0	0	0	0	0	0	0
Otu00152	0	0	0	0	0	0	0	0	0	0	0	0	0	0	0	0	0	0	0	0	0	0	0	0.0212887	0	0	0	0	0	0	0	0	0	0	0	0	0	0	0	0	0	0	0	0	0
Otu00153	0	0	0	0	0.0229416	0	0	0	0	0	0	0	0	0	0	0	0	0	0	0	0	0	0	0	0	0	0	0	0	0	0	0	0	0	0	0	0	0	0	0	0	0	0	0	0
Otu00154	0	0	0	0	0	0	0	0	0	0	0	0	0	0	0	0	0	0	0	0	0	0	0	0	0	0	0	0	0	0	0	0	0	0	0	0	0	0	0	0	0	0	0	0	0.0197984
Otu00155	0	0	0	0	0	0	0	0	0.0120968	0	0	0	0	0	0	0	0	0	0	0	0	0	0	0	0	0	0	0	0	0	0	0	0	0	0	0	0	0	0	0	0	0	0	0	0
Otu00159	0.0108235	0	0	0	0	0	0	0	0	0	0	0	0	0	0	0	0	0	0	0	0	0	0	0	0	0	0	0	0	0	0	0	0	0	0	0	0	0	0	0	0	0	0	0	0
Otu00161	0	0	0	0	0	0	0	0	0	0	0	0	0	0	0	0	0	0	0	0	0	0	0	0	0	0	0	0	0	0	0	0	0	0	0.0125031	0	0	0	0	0	0	0	0	0	0
Otu00162	0	0	0	0	0	0	0	0	0	0	0	0	0	0	0	0	0	0	0.01039	0	0	0	0	0	0	0	0	0	0	0	0	0	0	0	0	0	0	0	0	0	0	0	0	0	0
Otu00163	0	0	0	0	0	0	0	0	0	0	0	0	0	0	0	0	0	0	0	0	0	0	0	0	0	0	0	0	0	0.0187419	0	0	0	0	0	0	0	0	0	0	0	0	0	0	0
Otu00164	0	0	0	0	0.0213921	0	0	0	0	0	0	0	0	0	0	0	0	0	0	0	0	0	0	0	0	0	0	0	0	0	0	0	0	0	0	0	0	0	0	0	0	0	0	0	0
Otu00170	0	0	0	0	0.0197802	0	0	0	0	0	0	0	0	0	0	0	0	0	0	0	0	0	0	0	0	0	0	0	0	0	0	0	0	0	0	0	0	0	0	0	0	0	0	0	0
Otu00173	0	0	0	0	0	0	0	0	0	0	0	0	0	0	0	0	0	0	0	0	0	0	0	0	0	0	0	0	0	0	0	0	0	0	0	0	0	0	0	0	0.019303	0	0	0	0
Otu00178	0	0	0	0	0	0	0	0	0	0	0	0	0	0	0	0	0	0	0	0	0	0	0	0	0	0	0	0	0	0.0155381	0	0	0	0	0	0	0	0	0	0	0	0	0	0	0
Otu00179	0	0	0	0	0	0	0	0	0	0	0	0.0153231	0	0	0	0	0	0	0	0	0	0	0	0	0	0	0	0	0	0	0	0	0	0	0	0	0	0	0	0	0	0	0	0	0
Otu00182	0	0	0	0.0108828	0	0	0	0	0	0	0	0	0	0	0	0	0	0	0	0	0	0	0	0	0	0	0	0	0	0	0	0	0	0	0	0	0	0	0	0	0	0	0	0	0
Otu00186	0	0	0	0	0	0	0	0	0	0	0	0	0	0	0	0	0	0	0	0	0	0	0	0	0	0	0	0	0	0	0	0	0	0	0.0107994	0	0	0	0	0	0	0	0	0	0
Otu00199	0	0	0	0	0	0	0	0	0	0	0	0	0	0	0	0	0	0	0.0123634	0	0	0	0	0	0	0	0	0	0	0	0	0	0	0	0	0	0	0	0	0	0	0	0	0	0
Otu00201	0	0	0	0	0	0	0	0	0	0	0	0	0	0	0.0223883	0	0	0	0	0	0	0	0	0	0	0	0	0	0	0	0	0	0	0	0	0	0	0	0	0	0	0	0	0	0
Otu00204	0	0	0	0	0	0	0	0	0	0	0	0	0	0	0	0	0	0	0	0	0	0	0	0	0	0	0.012095	0	0	0	0	0	0	0	0	0	0	0	0	0	0	0	0	0	0
Otu00210	0	0	0	0.0440477	0	0	0	0	0	0	0	0	0	0	0	0	0	0	0	0	0	0	0	0	0	0	0	0	0	0	0	0	0	0	0	0	0	0	0	0	0	0	0	0	0
Otu00224	0	0	0	0.0114731	0	0	0	0	0	0	0	0	0	0	0	0	0	0	0	0	0	0	0	0	0	0	0	0	0	0	0	0	0	0	0	0	0	0	0	0	0	0	0	0	0
Otu00228	0	0	0	0	0	0	0	0	0	0	0	0	0	0	0	0	0	0	0	0	0	0	0	0	0	0	0.0123551	0	0	0	0	0	0	0	0	0	0	0	0	0	0	0	0	0	0
Otu00239	0	0	0	0	0	0	0	0	0	0	0	0	0	0	0.0138686	0	0	0	0	0	0	0	0	0	0	0	0	0	0	0	0	0	0	0	0	0	0	0	0	0	0	0	0	0	0
Otu00306	0	0	0	0.0235364	0	0	0	0	0	0	0	0	0	0	0	0	0	0	0	0	0	0	0	0	0	0	0	0	0	0	0	0	0	0	0	0	0	0	0	0	0	0	0	0	0
Otu00313	0	0	0	0	0	0.0109496	0	0	0	0	0	0	0	0	0	0	0	0	0	0	0	0	0	0	0	0	0	0	0	0	0	0	0	0	0	0	0	0	0	0	0	0	0	0	0
Otu00339	0	0	0	0.0136127	0	0	0	0	0	0	0	0	0	0	0	0	0	0	0	0	0	0	0	0	0	0	0	0	0	0	0	0	0	0	0	0	0	0	0	0	0	0	0	0	0
Otu00430	0	0	0	0.0141292	0	0	0	0	0	0	0	0	0	0	0	0	0	0	0	0	0	0	0	0	0	0	0	0	0	0	0	0	0	0	0	0	0	0	0	0	0	0	0	0	0
Otu00473	0	0	0	0.011141	0	0	0	0	0	0	0	0	0	0	0	0	0	0	0	0	0	0	0	0	0	0	0	0	0	0	0	0	0	0	0	0	0	0	0	0	0	0	0	0	0

## Sheet: S10 - Cardiocondyla OTU IDs
	Rank1	Rank2	Rank3	Rank4	Rank5	Rank6
Otu00001	Bacteria	Proteobacteria	Gammaproteobacteria	Enterobacteriales	Enterobacteriaceae	Candidatus_Westeberhardia
Otu00002	Bacteria	Proteobacteria	Gammaproteobacteria	Enterobacteriales	Enterobacteriaceae	Candidatus_Westeberhardia
Otu00003	Bacteria	Proteobacteria	Gammaproteobacteria	Enterobacteriales	Enterobacteriaceae	Candidatus_Westeberhardia
Otu00004	Bacteria	Proteobacteria	Gammaproteobacteria	Pseudomonadales	Moraxellaceae	Acinetobacter
Otu00005	Bacteria	Proteobacteria	Gammaproteobacteria	Enterobacteriales	Enterobacteriaceae	Candidatus_Westeberhardia
Otu00007	Bacteria	Proteobacteria	Gammaproteobacteria	Enterobacteriales	Enterobacteriaceae	Serratia
Otu00008	Bacteria	Proteobacteria	Gammaproteobacteria	Pseudomonadales	Pseudomonadaceae	Pseudomonas
Otu00009	Bacteria	Proteobacteria	Alphaproteobacteria	Rickettsiales	Anaplasmataceae	Wolbachia
Otu00010	Bacteria	Tenericutes	Mollicutes	Entomoplasmatales	Spiroplasmataceae	Spiroplasma
Otu00011	Bacteria	Proteobacteria	Gammaproteobacteria	Pseudomonadales	Moraxellaceae	Acinetobacter
Otu00012	Bacteria	Firmicutes	Bacilli	Bacillales	Staphylococcaceae	Staphylococcus
Otu00013	Bacteria	Proteobacteria	Alphaproteobacteria	Rickettsiales	Anaplasmataceae	Wolbachia
Otu00014	Bacteria	Proteobacteria	Gammaproteobacteria	Enterobacteriales	Enterobacteriaceae	Candidatus_Westeberhardia
Otu00015	Bacteria	Proteobacteria	Gammaproteobacteria	Enterobacteriales	Enterobacteriaceae	Arsenophonus
Otu00016	Bacteria	Proteobacteria	Gammaproteobacteria	Pseudomonadales	Moraxellaceae	Acinetobacter
Otu00017	Bacteria	Tenericutes	Mollicutes	Entomoplasmatales	Entomoplasmataceae	Mesoplasma
Otu00018	Bacteria	Proteobacteria	Gammaproteobacteria	Pseudomonadales	Moraxellaceae	Acinetobacter
Otu00019	Bacteria	Proteobacteria	Alphaproteobacteria	Rhizobiales	Rhizobiaceae	Shinella
Otu00021	Bacteria	Bacteroidetes	Bacteroidia	Flavobacteriales	Flavobacteriaceae	Flavobacterium
Otu00022	Bacteria	Proteobacteria	Gammaproteobacteria	Xanthomonadales	Xanthomonadaceae	Vulcaniibacterium
Otu00023	Bacteria	Firmicutes	Bacilli	Bacillales	Staphylococcaceae	Staphylococcus
Otu00024	Bacteria	Proteobacteria	Gammaproteobacteria	Enterobacteriales	Enterobacteriaceae	Serratia
Otu00025	Bacteria	Proteobacteria	Gammaproteobacteria	Enterobacteriales	Enterobacteriaceae	Enterobacteriaceae_unclassified
Otu00026	Bacteria	Actinobacteria	Actinobacteria	Corynebacteriales	Segniliparaceae	Segniliparus
Otu00027	Bacteria	Proteobacteria	Gammaproteobacteria	Enterobacteriales	Enterobacteriaceae	Pluralibacter
Otu00028	Bacteria	Proteobacteria	Alphaproteobacteria	Rhizobiales	Xanthobacteraceae	Bradyrhizobium
Otu00030	Bacteria	Tenericutes	Mollicutes	Entomoplasmatales	Spiroplasmataceae	Spiroplasma
Otu00031	Bacteria	Proteobacteria	Alphaproteobacteria	Rhodobacterales	Rhodobacteraceae	Paracoccus
Otu00032	Bacteria	Proteobacteria	Gammaproteobacteria	Aeromonadales	Aeromonadaceae	Aeromonas
Otu00033	Bacteria	Actinobacteria	Actinobacteria	Micrococcales	Brevibacteriaceae	Brevibacterium
Otu00034	Bacteria	Proteobacteria	Gammaproteobacteria	Betaproteobacteriales	Rhodocyclaceae	Methyloversatilis
Otu00035	Bacteria	Actinobacteria	Actinobacteria	Corynebacteriales	Mycobacteriaceae	Mycobacterium
Otu00036	Bacteria	Proteobacteria	Gammaproteobacteria	Pseudomonadales	Pseudomonadaceae	Pseudomonas
Otu00037	Bacteria	Actinobacteria	Actinobacteria	Corynebacteriales	Tsukamurellaceae	Tsukamurella
Otu00038	Bacteria	Proteobacteria	Gammaproteobacteria	Enterobacteriales	Enterobacteriaceae	Enterobacteriaceae_unclassified
Otu00039	Bacteria	Bacteroidetes	Bacteroidia	Chitinophagales	Chitinophagaceae	Sediminibacterium
Otu00040	Bacteria	Proteobacteria	Gammaproteobacteria	Pseudomonadales	Moraxellaceae	Acinetobacter
Otu00041	Bacteria	Actinobacteria	Actinobacteria	Corynebacteriales	Corynebacteriaceae	Corynebacterium_1
Otu00042	Bacteria	Proteobacteria	Alphaproteobacteria	Rickettsiales	Anaplasmataceae	Wolbachia
Otu00043	Bacteria	Proteobacteria	Gammaproteobacteria	Pseudomonadales	Moraxellaceae	Acinetobacter
Otu00044	Bacteria	Tenericutes	Mollicutes	Entomoplasmatales	Spiroplasmataceae	Spiroplasma
Otu00045	Bacteria	Actinobacteria	Actinobacteria	Corynebacteriales	Nocardiaceae	Gordonia
Otu00046	Bacteria	Proteobacteria	Gammaproteobacteria	Enterobacteriales	Enterobacteriaceae	Candidatus_Westeberhardia
Otu00047	Bacteria	Bacteroidetes	Bacteroidia	Sphingobacteriales	Sphingobacteriaceae	Sphingobacterium
Otu00048	Bacteria	Proteobacteria	Alphaproteobacteria	Rhodobacterales	Rhodobacteraceae	Paracoccus
Otu00049	Bacteria	Bacteroidetes	Bacteroidia	Flavobacteriales	Flavobacteriaceae	Myroides
Otu00050	Bacteria	Proteobacteria	Gammaproteobacteria	Xanthomonadales	Xanthomonadaceae	Stenotrophomonas
Otu00051	Bacteria	Bacteroidetes	Bacteroidia	Sphingobacteriales	Sphingobacteriaceae	Sphingobacterium
Otu00052	Bacteria	Tenericutes	Mollicutes	Entomoplasmatales	Spiroplasmataceae	Spiroplasma
Otu00053	Bacteria	Bacteroidetes	Bacteroidia	Flavobacteriales	Weeksellaceae	Chryseobacterium
Otu00055	Bacteria	Actinobacteria	Actinobacteria	Corynebacteriales	uncultured	uncultured_ge
Otu00056	Bacteria	Proteobacteria	Alphaproteobacteria	Rickettsiales	Anaplasmataceae	Wolbachia
Otu00058	Bacteria	Actinobacteria	Actinobacteria	Pseudonocardiales	Pseudonocardiaceae	Pseudonocardia
Otu00059	Bacteria	Proteobacteria	Gammaproteobacteria	Betaproteobacteriales	Burkholderiaceae	Burkholderiaceae_unclassified
Otu00060	Bacteria	Actinobacteria	Actinobacteria	Corynebacteriales	Nocardiaceae	Nocardia
Otu00061	Bacteria	Proteobacteria	Gammaproteobacteria	Betaproteobacteriales	Burkholderiaceae	Burkholderiaceae_unclassified
Otu00062	Bacteria	Proteobacteria	Gammaproteobacteria	Pseudomonadales	Moraxellaceae	Acinetobacter
Otu00063	Bacteria	Proteobacteria	Gammaproteobacteria	Betaproteobacteriales	Burkholderiaceae	Delftia
Otu00064	Bacteria	Proteobacteria	Gammaproteobacteria	Betaproteobacteriales	Burkholderiaceae	Ralstonia
Otu00065	Bacteria	Proteobacteria	Gammaproteobacteria	Pseudomonadales	Pseudomonadaceae	Pseudomonas
Otu00066	Bacteria	Proteobacteria	Alphaproteobacteria	Rhizobiales	Rhizobiaceae	Rhizobiaceae_unclassified
Otu00067	Bacteria	Proteobacteria	Alphaproteobacteria	Rhizobiales	Beijerinckiaceae	Chelatococcus
Otu00068	Bacteria	Proteobacteria	Gammaproteobacteria	Xanthomonadales	Xanthomonadaceae	Pseudoxanthomonas
Otu00069	Bacteria	Actinobacteria	Actinobacteria	Micrococcales	Micrococcaceae	Glutamicibacter
Otu00070	Bacteria	Proteobacteria	Gammaproteobacteria	Enterobacteriales	Enterobacteriaceae	Candidatus_Westeberhardia
Otu00071	Bacteria	Proteobacteria	Gammaproteobacteria	Pseudomonadales	Moraxellaceae	Acinetobacter
Otu00072	Bacteria	Proteobacteria	Gammaproteobacteria	Betaproteobacteriales	Burkholderiaceae	Achromobacter
Otu00073	Bacteria	Proteobacteria	Alphaproteobacteria	Rhizobiales	Rhizobiaceae	Brucella
Otu00074	Bacteria	Firmicutes	Bacilli	Bacillales	Bacillales_unclassified	Bacillales_unclassified
Otu00075	Bacteria	Actinobacteria	Actinobacteria	Micrococcales	Micrococcaceae	Glutamicibacter
Otu00076	Bacteria	Proteobacteria	Gammaproteobacteria	Pseudomonadales	Pseudomonadaceae	Pseudomonas
Otu00077	Bacteria	Tenericutes	Mollicutes	Entomoplasmatales	Spiroplasmataceae	Spiroplasma
Otu00078	Bacteria	Proteobacteria	Gammaproteobacteria	Pseudomonadales	Moraxellaceae	Enhydrobacter
Otu00079	Bacteria	Firmicutes	Bacilli	Lactobacillales	Lactobacillaceae	Lactobacillus
Otu00080	Bacteria	Proteobacteria	Gammaproteobacteria	Betaproteobacteriales	Burkholderiaceae	Acidovorax
Otu00081	Bacteria	Actinobacteria	Actinobacteria	Corynebacteriales	Corynebacteriaceae	Corynebacterium_1
Otu00082	Bacteria	Proteobacteria	Gammaproteobacteria	Betaproteobacteriales	Burkholderiaceae	Massilia
Otu00083	Bacteria	Actinobacteria	Actinobacteria	Streptomycetales	Streptomycetaceae	Streptomyces
Otu00084	Bacteria	Actinobacteria	Actinobacteria	Corynebacteriales	Corynebacteriaceae	Corynebacteriaceae_unclassified
Otu00085	Bacteria	Proteobacteria	Alphaproteobacteria	Caulobacterales	Caulobacteraceae	Brevundimonas
Otu00086	Bacteria	Bacteroidetes	Bacteroidia	Sphingobacteriales	Sphingobacteriaceae	Sphingobacteriaceae_unclassified
Otu00087	Bacteria	Bacteroidetes	Bacteroidia	Cytophagales	Spirosomaceae	Spirosoma
Otu00088	Bacteria	Proteobacteria	Gammaproteobacteria	Betaproteobacteriales	Burkholderiaceae	Pigmentiphaga
Otu00089	Bacteria	Actinobacteria	Actinobacteria	Corynebacteriales	Corynebacteriaceae	Corynebacteriaceae_unclassified
Otu00090	Bacteria	Proteobacteria	Alphaproteobacteria	Rhizobiales	Beijerinckiaceae	Microvirga
Otu00091	Bacteria	Proteobacteria	Alphaproteobacteria	Rhizobiales	Rhizobiaceae	Rhizobiaceae_unclassified
Otu00092	Bacteria	Actinobacteria	Actinobacteria	Micrococcales	Microbacteriaceae	Rhodoluna
Otu00093	Bacteria	Proteobacteria	Alphaproteobacteria	Rhizobiales	Rhizobiaceae	Rhizobiaceae_unclassified
Otu00094	Bacteria	Proteobacteria	Gammaproteobacteria	Pseudomonadales	Pseudomonadaceae	Pseudomonas
Otu00095	Bacteria	Actinobacteria	Actinobacteria	Corynebacteriales	Nocardiaceae	Gordonia
Otu00096	Bacteria	Bacteroidetes	Bacteroidia	Flavobacteriales	Weeksellaceae	Chryseobacterium
Otu00097	Bacteria	Proteobacteria	Gammaproteobacteria	Xanthomonadales	Xanthomonadaceae	Luteimonas
Otu00098	Bacteria	Proteobacteria	Alphaproteobacteria	Rhizobiales	Beijerinckiaceae	Methylobacterium
Otu00100	Bacteria	RsaHf231	RsaHf231_cl	RsaHf231_or	RsaHf231_fa	RsaHf231_ge
Otu00101	Bacteria	Proteobacteria	Gammaproteobacteria	Pseudomonadales	Pseudomonadaceae	Pseudomonas
Otu00102	Bacteria	Proteobacteria	Alphaproteobacteria	Rickettsiales	Anaplasmataceae	Wolbachia
Otu00104	Bacteria	Proteobacteria	Alphaproteobacteria	Sphingomonadales	Sphingomonadaceae	Sphingobium
Otu00105	Bacteria	Bacteroidetes	Bacteroidia	Sphingobacteriales	Sphingobacteriaceae	Sphingobacterium
Otu00106	Bacteria	Bacteroidetes	Bacteroidia	Flavobacteriales	Flavobacteriaceae	Flavobacterium
Otu00107	Bacteria	Actinobacteria	Actinobacteria	Corynebacteriales	Mycobacteriaceae	Mycobacterium
Otu00108	Bacteria	Proteobacteria	Gammaproteobacteria	Enterobacteriales	Enterobacteriaceae	Enterobacteriaceae_unclassified
Otu00109	Bacteria	Proteobacteria	Gammaproteobacteria	Betaproteobacteriales	Burkholderiaceae	Polynucleobacter
Otu00110	Bacteria	Proteobacteria	Gammaproteobacteria	Betaproteobacteriales	Burkholderiaceae	Caldimonas
Otu00111	Bacteria	Proteobacteria	Alphaproteobacteria	Rhizobiales	Beijerinckiaceae	Methylobacterium
Otu00112	Bacteria	Bacteroidetes	Bacteroidia	Chitinophagales	Chitinophagaceae	Vibrionimonas
Otu00113	Bacteria	Proteobacteria	Gammaproteobacteria	Xanthomonadales	Xanthomonadaceae	Lysobacter
Otu00114	Bacteria	Verrucomicrobia	Verrucomicrobiae	Verrucomicrobiales	Verrucomicrobiaceae	uncultured
Otu00115	Bacteria	Proteobacteria	Alphaproteobacteria	Rickettsiales	Anaplasmataceae	Wolbachia
Otu00116	Bacteria	Bacteroidetes	Bacteroidia	Flavobacteriales	Flavobacteriaceae	Flavobacterium
Otu00120	Bacteria	Firmicutes	Bacilli	Bacillales	Paenibacillaceae	Paenibacillus
Otu00121	Bacteria	Proteobacteria	Gammaproteobacteria	Xanthomonadales	Xanthomonadaceae	Stenotrophomonas
Otu00122	Bacteria	Firmicutes	Bacilli	Bacillales	Bacillaceae	Bacillaceae_unclassified
Otu00124	Bacteria	Proteobacteria	Alphaproteobacteria	Caulobacterales	Caulobacteraceae	Brevundimonas
Otu00126	Bacteria	Proteobacteria	Gammaproteobacteria	Xanthomonadales	Xanthomonadaceae	Stenotrophomonas
Otu00127	Bacteria	Proteobacteria	Alphaproteobacteria	Rhizobiales	Rhizobiaceae	Rhizobiaceae_unclassified
Otu00128	Bacteria	Proteobacteria	Gammaproteobacteria	Betaproteobacteriales	Betaproteobacteriales_unclassified	Betaproteobacteriales_unclassified
Otu00129	Bacteria	Proteobacteria	Alphaproteobacteria	Sphingomonadales	Sphingomonadaceae	Sphingomonas
Otu00130	Bacteria	Proteobacteria	Gammaproteobacteria	Betaproteobacteriales	Burkholderiaceae	Pigmentiphaga
Otu00131	Bacteria	Proteobacteria	Gammaproteobacteria	Betaproteobacteriales	Burkholderiaceae	Burkholderiaceae_unclassified
Otu00132	Bacteria	Actinobacteria	Actinobacteria	Corynebacteriales	Corynebacteriaceae	Corynebacterium_1
Otu00133	Bacteria	Actinobacteria	Actinobacteria	Pseudonocardiales	Pseudonocardiaceae	Pseudonocardiaceae_unclassified
Otu00134	Bacteria	Firmicutes	Bacilli	Bacillales	Paenibacillaceae	Paenibacillus
Otu00135	Bacteria	Bacteroidetes	Bacteroidia	Sphingobacteriales	Sphingobacteriaceae	Sphingobacterium
Otu00137	Bacteria	Proteobacteria	Alphaproteobacteria	Rickettsiales	Anaplasmataceae	Wolbachia
Otu00138	Bacteria	Proteobacteria	Gammaproteobacteria	Pseudomonadales	Pseudomonadaceae	Pseudomonadaceae_unclassified
Otu00139	Bacteria	Proteobacteria	Gammaproteobacteria	Enterobacteriales	Enterobacteriaceae	Arsenophonus
Otu00140	Bacteria	Actinobacteria	Thermoleophilia	Solirubrobacterales	Solirubrobacteraceae	Parviterribacter
Otu00141	Bacteria	Proteobacteria	Alphaproteobacteria	Rhizobiales	Methylopilaceae	Methylopila
Otu00142	Bacteria	Proteobacteria	Gammaproteobacteria	Enterobacteriales	Enterobacteriaceae	Enterobacteriaceae_unclassified
Otu00143	Bacteria	Actinobacteria	Actinobacteria	Corynebacteriales	Tsukamurellaceae	Tsukamurella
Otu00144	Bacteria	Proteobacteria	Gammaproteobacteria	Enterobacteriales	Enterobacteriaceae	Arsenophonus
Otu00145	Bacteria	Bacteroidetes	Bacteroidia	Cytophagales	Spirosomaceae	Pseudarcicella
Otu00146	Bacteria	Proteobacteria	Alphaproteobacteria	Rhizobiales	Rhizobiaceae	Mesorhizobium
Otu00148	Bacteria	Actinobacteria	Actinobacteria	Corynebacteriales	Corynebacteriaceae	Corynebacteriaceae_unclassified
Otu00149	Bacteria	Actinobacteria	Actinobacteria	Corynebacteriales	Corynebacteriaceae	Corynebacterium_1
Otu00150	Bacteria	Proteobacteria	Alphaproteobacteria	Sphingomonadales	Sphingomonadaceae	Sphingobium
Otu00151	Bacteria	Proteobacteria	Gammaproteobacteria	Enterobacteriales	Enterobacteriaceae	Enterobacteriaceae_unclassified
Otu00152	Bacteria	Proteobacteria	Gammaproteobacteria	Enterobacteriales	Enterobacteriaceae	Enterobacteriaceae_unclassified
Otu00153	Bacteria	Proteobacteria	Gammaproteobacteria	Enterobacteriales	Enterobacteriaceae	Arsenophonus
Otu00154	Bacteria	Actinobacteria	Actinobacteria	Propionibacteriales	Nocardioidaceae	Aeromicrobium
Otu00155	Bacteria	Proteobacteria	Alphaproteobacteria	Rhizobiales	Xanthobacteraceae	Afipia
Otu00159	Bacteria	Firmicutes	Bacilli	Bacillales	Bacillaceae	Anoxybacillus
Otu00161	Bacteria	Bacteroidetes	Bacteroidia	Sphingobacteriales	Sphingobacteriaceae	Sphingobacterium
Otu00162	Bacteria	Proteobacteria	Alphaproteobacteria	Rhizobiales	Beijerinckiaceae	Methylobacterium
Otu00163	Bacteria	Proteobacteria	Gammaproteobacteria	Enterobacteriales	Enterobacteriaceae	Enterobacteriaceae_unclassified
Otu00164	Bacteria	Proteobacteria	Gammaproteobacteria	Enterobacteriales	Enterobacteriaceae	Arsenophonus
Otu00170	Bacteria	Proteobacteria	Gammaproteobacteria	Enterobacteriales	Enterobacteriaceae	Arsenophonus
Otu00173	Bacteria	Proteobacteria	Gammaproteobacteria	Betaproteobacteriales	Burkholderiaceae	Burkholderiaceae_unclassified
Otu00178	Bacteria	Proteobacteria	Gammaproteobacteria	Enterobacteriales	Enterobacteriaceae	Arsenophonus
Otu00179	Bacteria	Bacteroidetes	Bacteroidia	Sphingobacteriales	Lentimicrobiaceae	Lentimicrobiaceae_ge
Otu00182	Bacteria	Bacteroidetes	Bacteroidia	Sphingobacteriales	Sphingobacteriaceae	Sphingobacterium
Otu00186	Bacteria	Proteobacteria	Gammaproteobacteria	Xanthomonadales	Xanthomonadaceae	Stenotrophomonas
Otu00199	Bacteria	Proteobacteria	Alphaproteobacteria	Acetobacterales	Acetobacteraceae	Belnapia
Otu00201	Bacteria	Proteobacteria	Gammaproteobacteria	Betaproteobacteriales	Burkholderiaceae	Burkholderiaceae_unclassified
Otu00204	Bacteria	Actinobacteria	Actinobacteria	Propionibacteriales	Nocardioidaceae	Nocardioides
Otu00210	Bacteria	Bacteroidetes	Bacteroidia	Chitinophagales	Chitinophagaceae	Chitinophagaceae_unclassified
Otu00224	Bacteria	Proteobacteria	Alphaproteobacteria	Caulobacterales	Caulobacteraceae	Caulobacter
Otu00228	Bacteria	Actinobacteria	Actinobacteria	Micrococcales	Promicromonosporaceae	Promicromonospora
Otu00239	Bacteria	Proteobacteria	Gammaproteobacteria	Xanthomonadales	Xanthomonadaceae	Stenotrophomonas
Otu00306	Bacteria	Proteobacteria	Alphaproteobacteria	Caulobacterales	Caulobacteraceae	Brevundimonas
Otu00313	Bacteria	Proteobacteria	Gammaproteobacteria	Betaproteobacteriales	Burkholderiaceae	Burkholderia-Caballeronia-Paraburkholderia
Otu00339	Bacteria	Proteobacteria	Alphaproteobacteria	Sphingomonadales	Sphingomonadaceae	Sphingomonadaceae_unclassified
Otu00430	Bacteria	Proteobacteria	Gammaproteobacteria	Pseudomonadales	Moraxellaceae	Alkanindiges
Otu00473	Bacteria	Actinobacteria	Actinobacteria	Propionibacteriales	Nocardioidaceae	Aeromicrobium

[truncated: 1 more sheets: S11 - Negative 16S Controls]
